## Defining dysfunction due to loss of MECP2 in Rett Patient Brain

Korsakova E<sup>1,2,4</sup>, Morales A<sup>1,2</sup>, McDaniel T<sup>2</sup>, Lund A<sup>1</sup>, Cooper B<sup>2</sup>, Ma F<sup>2</sup>, Allison TF<sup>6</sup>, Plath K<sup>1,4,5,6</sup>,  
Graham NA, Bhaduri A<sup>1,4,6</sup> and Lowry WE<sup>1,2,3,4,5</sup>

1, Molecular Biology Institute, UCLA

2, Department of Molecular Cell and Developmental Biology, UCLA

3, Division of Dermatology, David Geffen School of Medicine, UCLA

4, Broad Center for Regenerative Medicine, UCLA

5, Jonsson Comprehensive Cancer Center, UCLA

6, Department of Biological Chemistry, David Geffen School of Medicine, UCLA

7, Mork Family Department of Chemical Engineering and Materials Science, University of Southern California, Los Angeles, CA 90089, USA.

To whom correspondence should be addressed:

William E Lowry

615 Charles Young Drive South

Los Angeles, CA 90095

[blowry@ucla.edu](mailto:blowry@ucla.edu)

and

Aparna Bhaduri

621 Charles Young Drive South

Los Angeles, CA 90095

[ABhaduri@mednet.ucla.edu](mailto:ABhaduri@mednet.ucla.edu)

## Abstract

Rett Syndrome is characterized by a postnatal loss of neurophysiological function and regression of childhood development. Because the syndrome is X-linked and males with MECP2 mutations generally do not survive birth, the study of this syndrome has been complicated by the fact that in female brain, a portion of neurons express wild type MECP2, and another portion express a non-functional allele of MECP2. Therefore, bulk-RNA-sequencing of Rett brain is confounded by the presence of chimerism of neurons for functional MECP2 in neurons. We developed an approach that allows for single-nuclei transcriptional profiling of individual neurons and a direct comparison between neurons that express functional MECP2 with those that express the disease-causing allele. We found that mutant neurons from Rett brain show patterns of aberrant expression of synaptic and metabolic genes, both of which can be detected in *in vitro* models of Rett Syndrome. We used these resources to identify a role for POU2F1/OCT1 transcription factor in mediating the response to stress due to loss of MECP2, highlighting a potential key molecular regulator of stress in Rett neurons. Together, our new sorting approach enables us to highlight defective molecular and metabolic pathways in Rett brain neurons and suggests that *in vitro* models could serve as valuable tools to further study this syndrome and potentially for development of novel therapeutics.

## Introduction

The disruption of the methyl-CpG-binding protein 2 (MECP2), encoded on the X chromosome, is known to cause a severe neurodevelopmental disease called Rett Syndrome[1]. It is an X-linked dominant disorder observed mostly in female heterozygotes, as males with this mutation on their only X chromosome typically fail to survive birth[1]. Female patients with Rett Syndrome present with short stature overall, but have a relatively more profound microcephaly phenotype, suggesting a prominent role for MECP2 in the brain[2]. While the MECP2 protein is present in all tissues, the expression of MECP2 is particularly high in all types of mature neurons of the CNS[3]. Brain-specific deletion of MECP2 in mice phenocopies MECP2-null animals[4-7], and subsequent studies showed that neuronal specific deletion of MECP2 recapitulated phenotypes of MECP2-null animals.

MECP2 has been described as both a transcriptional stimulator and inhibitor, a regulator of RNA splicing, and a regulator of DNA methylation or reader of methylation[8-10]. Moreover, loss of MECP2 has been argued to lead to a variety of cell physiological defects such as mitochondrial permeability, diminished dendritic branching, altered electrophysiological activity, and changes in nuclear and nucleolar size, etc[11, 12]. Despite all these interesting observations, it is still not clear which of these are relevant for human Rett Syndrome patients, and which should serve as proxies for experimentally targeting and developing therapeutic strategies. The vast majority of these observations have been made *in vitro* with cell-based models of the disease or in murine models of the syndrome lacking MECP2[12], instead of in actual Rett patients. Therefore, the identification of which of these phenotypes occur in human patient brain is critical to

understand the etiology of the disease and to uncover which *in vitro* or murine models most accurately reflect the human condition.

We previously created an isogenic *in vitro* system to model how the loss of MECP2 impacts development of human neural cell types by exploiting reprogramming of patient fibroblasts to a pluripotent state to create human induced pluripotent stem cells (hiPSCs), and differentiation towards particular neural lineages (Neural Progenitor Cells (NPCs) and interneurons)[13]. Our previously published work with this *in vitro* model of Rett Syndrome indicated that specifically postmitotic neurons lacking MECP2 show defects in dendritic branching coincident with induction of p53 and cellular senescence. Blocking senescence with P53 inhibition restored dendritic branching in Rett-patient-derived neurons[13]. These results were consistent with those of the Galderisi group who also showed senescence phenotypes in various Rett models[14, 15].

The study of the human Rett brain until very recently was limited to pathological examination of tissue or bulk molecular methods to understand the course of the disease. For example, Gogliotti et al performed bulk RNA-seq on a number of Rett brain samples versus unaffected controls, and found 100s of differentially expressed genes. However, the methods employed precluded identification of cell type specific changes and are complicated by the fact that the female Rett brain is chimeric for both MECP2 WT and MECP2 mutant cells based on random X-inactivation during development. A more recent study took advantage of differential SNPs between maternal and paternal alleles coupled with Single Cell-RNA-seq (sc-RNA-seq) to define gene expression changes in specific

cell types[16]. While this study did identify differentially expressed genes in MECP2-cells, the analysis did not implicate particular dysfunctional pathways to shed light on the effect of loss of MECP2 in neurons.

Here we employ single-nuclei sequencing (sn-RNA-seq) on neurons from Rett brains and unaffected control brains to understand the effects of loss of MECP2. In addition, we re-analyzed data from previous Rett brain studies, as well as various *in vitro* models, to corroborate our findings and identify effective models of Rett Syndrome. We determined that while loss of *MECP2* leads to differential synaptic and metabolic gene expression patterns, which are reminiscent of neurons in aging brain, the ratio of subtypes of neurons within Rett brain is not dramatically altered. We also identify *POU2F1/OCT1* as a potential key transcription factor regulator of the stress response observed in *MECP2*-null neurons, and demonstrate that some of the key phenotypes found in Rett brain are recapitulated in *in vitro* models of the disease.

## Results

*Method to isolate and profile neurons with and without expression of MECP2 from individual Rett patient brains* Rett syndrome is caused by a heterozygous mutation in MECP2 gene. MECP2 is an X-linked gene, thus half of MECP2 alleles are turned off in a female brain due to random X chromosome inactivation, resulting in roughly half of the expressed alleles being wild type and the other half harboring MECP2 mutations[1, 17]. By isolating cells from a single brain, we can directly compare wild type cells to the mutant cells, without confounding variables such as genetic background or environment.

We used banked frozen brain sections of Rett patients to investigate differences in gene expression between MECP2<sup>hi</sup> and MECP2<sup>low</sup> cells. We took advantage of post-mortem tissue where we previously showed that Rett patient neurons harbor chimerism for MECP2 expression[13]. To preserve maximum genetic material following tissue thawing, we isolated the nuclei from these sections (Fig 1A)[18]. Nuclei isolation was performed utilizing sucrose gradient accompanied by a series of washes and centrifugations. The quality of nuclei isolation was assessed visually and quantitatively using a hemocytometer. We were particularly interested in the role of MECP2 in neurons because deletion of this protein in neurons has a particularly strong effect in Rett models, and because MECP2 is known to be expressed at a higher level in neurons than other cell types in the brain. Thus, we chose NeuN, a commonly used mature neuron nuclear marker to isolate neuronal populations from Rett nuclei. We stained the nuclei with MECP2, NeuN and DAPI and subjected them to FACS. We collected DAPI<sup>+</sup>/NeuN<sup>+</sup> intact neuronal nuclei, which were either MECP2<sup>hi</sup> or MECP2<sup>low</sup>. To confirm the nuclei sorting strategy was successful, we used cytospin, immunostaining, and western blotting which confirmed that the expression level of MECP2 was highly diminished in the MECP2<sup>low</sup> population of neurons (Fig 1B and C).

Wild type and mutant neuronal nuclei were separately analyzed by both Drop-SEQ (3 individual Rett patients)[19] and 10x RNA sequencing (10x Genomics) (2 individual Rett patients). While both methods detected numerous clusters related to various neuronal subtypes and were largely concordant with one another, the coverage of the 10X capture

was more substantial and thus became the focus of our follow-on analyses (Supplemental Figure 1). The drop-seq data were sufficient to identify neuronal subtypes and were thus used to explore cell proportion changes in response to loss of MECP2. Clustering of the 10X data generated 19 transcriptionally unique clusters in both the WT and mutant populations. Further analysis of the gene expression revealed several subtypes each of inhibitory and excitatory neuronal populations (Fig 1D).

This sorting and transcriptomic approach allowed for a determination of whether the proportion of cell types was affected by MECP2 expression. Because NeuN expression tracked nearly identically with MECP2 expression in wildtype neurons (not shown), and because all identified subtypes of neurons expressed NeuN and MECP2 to a similar degree, we were able to construct a proportional analysis of cells types between MECP2<sup>hi</sup> and MECP2<sup>low</sup> neurons. In total, we generated data from 5 individual brains (with both Drop-seq and 10X), and we also re-analyzed data from Renthal et al that used SNP analysis to define WT vs mutant neurons from the Rett brain. Taken together, this analysis from 8 Rett samples did not reveal a significant difference in the ratio of any neuronal subtypes amongst all these Rett patient brains (Fig 1E). These data suggest that neurological deficits in Rett patients are probably not due to different proportions of neurons.

We next performed differential expression analysis and applied a *p-value* cut off of 0.01 to identify differentially expressed genes (DEGs) between MECP2<sup>hi</sup> and MECP2<sup>low</sup> neurons from each brain. We first compared DEGs identified in our own data versus those

uncovered from Renthal et al to identify overlap between the two methods (Supplemental Figure 2). In fact, DEGs from our 10X analysis overlapped significantly with data from the Greenberg group with independent brain samples despite the differences in methods (identification of WT vs Mutant and sc-RNA-seq approaches) (Figure 2A), indicative of the robustness of our approach. We next showed that there are overlapping DEGs patterns found in both excitatory and inhibitory neurons in Rett brain (Figure 2B), suggesting general physiological defects due to loss of MECP2. Looking at DEGs across various neuronal subtypes from our own data, we noticed that only a subset of neurons appear to be affected transcriptionally by loss of MECP2, suggesting there is something of a selective vulnerability (Figure 2C) as only particular subtypes of neurons showed significant transcriptional effects to loss of MECP2 despite the fact that this protein is ubiquitously expressed by all neurons. Another surprising finding was the BDNF, a gene that has been proposed to be a “target” of MECP2 regulation in scores of studies was only found to be strongly expressed in one excitatory neuron cluster (SLC17A7+/NR4A2+), and was not differentially expressed between MECP2<sup>hi</sup> and MECP2<sup>low</sup> neurons. While this is consistent with the Renthal et al study[16], this is in contrast to numerous studies in murine and human models of Rett Syndrome over the last 15 years, and could highlight the importance of studies of authentic disease patient tissue.

We then used Gene Ontological (GO) analysis to determine which patterns of gene expression are upregulated and downregulated in either excitatory or inhibitory subclasses of neurons in the absence of MECP2. Remarkably, in the two major classes



of excitatory neurons (SLC17A6+ and SCL17A7+), nearly all the gene expression changes induced in MECP2<sup>low</sup> neurons appeared to be related specifically to neuronal physiology such as ‘Neuron Projection Morphogenesis’, ‘Synapse Organization’, ‘Dendrite Development’, ‘Neuron Differentiation’ etc. This is an important observation considering recent data from our own group showing that Rett patient derived neural organoids show elevated levels of synapses and synaptic genes (Samarsinghe et al, 2021). On the other hand, the majority of gene expression changes downregulated, appeared to be related to cellular metabolism, such as ‘Translocation of GLUT4 to membrane’, ‘Mitochondrion Organization’, ‘Gluconeogenesis’ etc. Considering the overlapping pattern of DEGs shown in Figure 2B, it is not surprising that the same GO analysis on inhibitory neuron subtypes (RELN+, SST+, VIP+) yielded similar results, where the same categories of DEGs were found in both the up- and downregulated expression patterns. While it is perhaps not surprising that genes related to neuronal physiology were perturbed in MECP2<sup>low</sup> neurons in the Rett brain, considering previously reported phenotypes from both *in vivo* and *in vitro* phenotypes, the alteration of metabolism in Rett brain is relatively unexplored and warranted further investigation. This pattern of metabolic disruption at the RNA level could portend metabolic defects in the neurons, as it has been previously established that metabolic dysfunction can present at the level of RNA expression of important metabolic enzymes[20, 21].

Numerous attempts to model Rett Syndrome have taken advantage of deletion of *Mecp2* via homologous recombination[4, 5, 22-30]. These models recapitulate some, but not all phenotypes of human Rett Syndrome. We re-analyzed a dataset from murine Rett brain

and found first that many of the same neuronal-specific categories of genes were downregulated instead of upregulated as in the human Rett brain, and that most of the upregulated genes were related to inflammatory responses such as 'Inflammatory Response', 'Leukocyte Migration', 'Wound Healing' etc (Figure 2E). It is tempting to speculate that the differences observed between the human and murine cases is due to the design of the mouse model, whereby *Mecp2* was deleted as opposed to mutated, which could have induced a more profound phenotype than that observed in human.

Next, we looked at the published RNA sequencing data sets that recently became available for other syndromes such as Alzheimers, Aging, and Autism-Spectrum Disorders. Here we demonstrate that only the Aging brain showed a similar pattern to the Rett brain whereby genes related to synapse and metabolism pathways were misregulated. The Aging brain also showed a strong induction of inflammatory gene signatures similar to what we observed in the murine Rett brain such as 'Inflammatory Response', 'Positive Regulation of NFKB', 'Microglial Activation' etc. Conversely, downregulated gene categories were almost entirely related to metabolism such as 'Mitochondrion Organization', 'Inner Mitochondrion Membrane Organization' and 'Aerobic Respiration', nearly identical to what was observed in the human Rett brain. (Supplemental Figure 3) These data suggest that recent evidence for a role in senescence and neuronal stress in Rett neurons could be akin to premature aging of the neurons in Rett patients[13-15, 31-36].

*POU2F1/OCT1 binding sites are enriched in genes affected by loss of MECP2 function*

To gain more insight into the molecular nature of the changes in the Rett patient brain, we analyzed transcription factor binding sites enriched within the promoter of significantly altered genes (Figure 3A). A similar pattern emerged from analysis of the Greenberg Rett sc-RNA-seq data (Figure 3C), as well as in the Gogliotti bulk RNA-seq data from Rett brain (Figure 3D). Furthermore, looking across the Aging brain, Rett Brain, and *in vitro* culture, in every case, POU2F1/OCT1 binding sites were also among the most enriched in both up and downregulated genes (Figure 3, and 4). This suggests that POU2F1/OCT1 could be playing an outsized role in neuronal aging and in the response of neurons to loss of MECP2 in a variety of settings. This finding is interesting in light of extensive data suggesting that POU2F1/OCT1 is important in mediating stress responses in a variety of tissues[37-40], and the previous work from our group and the Galderisi group that MECP2<sup>low</sup> neurons undergo upregulation of stress response pathways downstream of P53[13-15].

To corroborate our findings and identify faithful *in vitro* models of Rett Syndrome, we investigated whether similar gene expression patterns are present in a cell culture model of Rett. We analyzed bulk RNA sequencing results of interneurons generated in our lab through a standard protocols using a combination of growth factors and three pharmacological inhibitors of signaling pathways[41, 42]. As in the Rett brain neurons, of MECP2 *in vitro* caused downregulation of 'Axon development', 'Synaptic signaling', 'Synapse assembly' and 'Cerebellum development'. In addition, MECP2<sup>low</sup> neurons showed induction of stress pathways such as 'Wound healing' and 'Negative regulation

of cell proliferation', similar to what was seen in Aging brains. Comparing isogenic neurons both wild type to mutant for *MECP2* expression revealed that *POU2F1/OCT1* was significantly upregulated at the protein level in the absence of *MECP2* by western blotting and immunofluorescence (Figure 4A, B).

#### *Potential routes to activation of POU2F1/OCT1*

*POU2F1/OCT1* is known to be regulated post-translationally through covalent modification and stabilization from degradation [43, 44]. Several studies have suggested that DNA damage or lack of DNA repair is a stressor sufficient to stabilize *POU2F1/OCT1* levels in the cell. Our data from Rett brain suggests that metabolic disruption is present and this could be another route to stabilization of *POU2F1/OCT1*. Therefore, to determine what types of stress in human neurons can stabilize *POU2F1/OCT1* protein, we treated wildtype human neurons with various stress inducing insults and measured *POU2F1/OCT1* protein levels. Because the sc-RNA-seq data from Rett brains showed evidence of neuronal dysfunction due to metabolic stress, we attempted to see which of these could potentially be relevant in *in vitro* models of Rett Syndrome, and which could potentially induce *POU2F1/OCT1* as a result.

In Ohashi et al[13] we showed evidence that *MECP2*<sup>low</sup> neurons potentially have increased DNA damage by staining for H2AX, even in the absence of deliberate DNA damage[13] using an interneuron differentiation scheme. Here, we repeated this type of study using neurons generated by growth factor withdrawal to determine the general applicability of these findings. We found that activation ofATR was significantly increased

upon UV induced DNA damage, and that MECP2<sup>+</sup> and MECP2<sup>-</sup> neurons responded similarly to the damage (Figure 5A). In addition, we found that inducing DNA damage in WT neurons led to a strong increase in POU2F1/OCT1 protein expression (Figure 5A and B), possibly indicating a role for POU2F1/OCT1 as a stress sensor also in human neurons.

Mitochondrial dysfunction is known to lead to induction of stress pathways such as P53[45]. Therefore, we attempted to disrupt mitochondrial function *in vitro* to ascertain whether metabolic stress could induce POU2F1/OCT1 protein stabilization in human neurons, as we predict is happening in Rett neurons *in vivo*. In fact, disruption of metabolic homeostasis through the use of uncoupling agents or inhibitors of the electron transport chain led to a significant induction of POU2F1/OCT1 protein in otherwise normal neurons to nearly the level observed in Rett mutant neurons (Figure 5C, D). Taken together, these experiments in Figure 5 suggest that either metabolic aberration or activation of DNA repair pathways in the Rett brain could potentially be driving changes in POU2F1/OCT1 activity or expression that then affect the expression of numerous target genes as reflected in the sc-RNA-seq data.

Based on the ontological analysis of the transcriptional data from the Rett brain, we hypothesized that glucose metabolism and pyruvate oxidation pathways could be disrupted in Rett neurons. To test this hypothesis *in vitro*, we next used glucose tracing and metabolomics by Mass Spectrometry to assess the utilization of glucose in neurons

with and without MECP2 function, and found defects in several TCA metabolites, which would be consistent with mitochondrial dysfunction due to lack of pyruvate oxidation and energy production through the electron transport chain (Figure 6A). Repeated metabolomics experiments were compiled and organized into pathway enrichment scores for the observed metabolic changes (similar to Gene Set Enrichment Analysis (GSEA) for RNA data) leading to categories such as 'Pyruvate metabolism' (Figure 6B). To functionally measure whether Rett neurons lacking MECP2 expression show defective cellular metabolism, we used Seahorse assay to determine their oxygen consumption rate, a direct output of mitochondrial function, particularly the TCA cycle and the electron transport chain, which was predicted to be affected in Rett neurons both in patients transcriptionally and in our *in vitro* model via metabolomics. The Seahorse assay showed that Rett mutant neurons from two distinct Rett patients are defective at all stages of the electron transport chain (Figure 6C). Further analysis of Seahorse data from these experiments show that these same Rett neurons from two patients had a reduced ATP consumption rate relative to isogenic neurons expressing MECP2 (Figure 6D).

We also reanalyzed the DEGs shown in Figure 3 to isolate just those called out as 'Metabolism related' by gene ontology, and used transcription factor binding site enrichment analysis to identify transcription factors that potentially regulate differences in metabolic gene expression. In the Metabolic genes upregulated, POU2F1/OCT1 again stood out as a potential regulator of these genes (Figure 6E). To take an unbiased approach to analyze metabolic pathways in the Rett brain, we next used Gene Set Enrichment Analysis (GSEA)[46] across all metabolic pathways from KEGG[47]. This

method allowed for comparison of the relative metabolic pathway expression in different neuronal cell types in the brain. This analysis demonstrated that most neuronal subtypes in the Rett brain have significantly reduced expression of the oxidative phosphorylation pathway (Figure 6F), consistent with the reduced TCA cycle activity observed in our *in vitro* model (Figure 6A-C). Together, these data are consistent with mitochondrial dysfunction in the absence of MECP2 function, which perhaps sheds light on some of the transcriptional differences observed in Rett brain. As others have already identified metabolic deficiencies in murine and human Rett experimental models[31, 32, 48], the single cell analysis performed here on human Rett brain suggests a similar dysfunction potentially driving Rett phenotypes in patients.

## **Discussion**

This study sheds new light on the etiology of Rett Syndrome by molecular interrogation of individual neurons from Rett patient brain tissue. From these data, several important observations were made about selective susceptibility of individual subtypes of neurons, the proportions of neuronal subtypes, effects on expression of synaptic genes, and the nature of stress in neurons induced by loss of *MECP2* function. We identified a transcription factor that potentially plays a role in regulating the differential gene expression observed in some subtypes of neurons lacking *MECP2* function. We used *in vitro* models to both confirm what we had observed in Rett brains, but also to extend this work and determine the nature of the stress

Given their critical role in cognition, it is especially important that neurons be equipped to withstand various threats such as injury and disease. This is especially true for postmitotic cells, which bear special relevance to Rett Syndrome because MECP2 is most highly expressed in these specifically [6, 7, 49]. It is known that many forms of neuronal stress response lead ultimately to the activation of various transcription factors, which in turn act to determine cell fate[50-52]. Some hypothesize that the resulting transcriptional changes may be a cellular attempt to mitigate the initial stress or its downstream impacts, remove damaged neurons, alter brain activity to compensate for the stressor, or may even directly be a pathological symptom [53]. Further, neuroinflammation, a known consequence of chronic stress [54], has been linked to MECP2 mutations as measured by observed dysregulation of several acute-phase response (APR) proteins in a Rett mouse model [55]. The current study attempted to define which types of neurons in the Rett brain are undergoing stress and what are potential molecular or physiological triggers of that stress.

Studies from our group and others have suggested an important role of senescence in Rett Syndrome. It has been argued that senescence may be a cellular adaptation designed to conserve energy required for division and differentiation so the cell can survive when facing stress[56]. The Galderisi group has published several studies demonstrating senescence in Rett patient mesenchymal stem cells (MSCs) [14, 15], partially MECP2 silenced human MSCs[14], MECP2 silenced human neuroblastoma cells [32], and heterozygous MECP2 mutant mouse mesenchymal stromal cells [31] and neural stem cells [32]. In our previous study on Rett derived hiPSCs, we found SASP induction in MECP2 null interneurons, consistent with these previous results[13]. While neurons



from the human Rett brain did not show clear transcriptional evidence of a senescence program, there was evidence for metabolic stress.

Given their critical role in cellular energy production, mitochondrial function is highly important for normal cell function. We found strong evidence for mitochondrial disruption in the Rett brain via ontological analysis of differentially expressed genes (Fig 6). These data were consistent with an increasingly large body of evidence which connects *Mecp2* deficiency to mitochondrial abnormalities, and in turn these abnormalities to further Rett phenotypes. Multiple studies in Rett mice models and human Rett samples have shown that *Mecp2* interacts with genes encoding mitochondrial subunits which are abnormally expressed in its absence [57-59]. Additionally, analysis of male mice hemizygous for *Mecp2* mutation revealed redox-imbalance across cytosol and mitochondria of neurons accompanied by increased oxygen consumption and generation of reactive oxygen species (ROS) [34]. Increased oxygen consumption was also confirmed in NPCs derived from Rett Syndrome patient cells in a separate study[60]. This is particularly interesting since another characteristic Rett mitochondrial alteration is a leaky inner membrane [61].

Our data suggest that *MECP2*<sup>low</sup> neurons have dysfunctional mitochondrial metabolism, which is consistent with previous studies. This is interesting in light of what is known about mitochondrial diseases caused by mutations in genes for mitochondrial proteins. These diseases share many of the characteristic clinical symptoms of Rett Syndrome including intellectual disability, motor problems, and seizures [62, 63]. In addition, they are

accompanied by evidence of oxidative damage and increased blood lactate and pyruvate content [64] which have also been identified as features of Rett [34, 61, 65].

There is also extensive evidence of the role of abnormal mitochondria in oxidative stress, a type of neuronal stress heavily implicated in many diseases including Rett Syndrome which leads to the before mentioned oxidative damage. Oxidative stress is a cellular condition caused by excessive ROS. This therefore suggests a positive feedback mechanism in which mitochondrial defects (initially stemming from MECP2 loss) lead to overproduction of ROS which in turn causes further mitochondrial defects due to oxidative stress. This cycle may explain the delayed onset of Rett as the initial mitochondrial deficiency caused by loss of MECP2 may not produce a large enough effect to lead to symptoms, but accumulation of mitochondrial defects over time can. However, this hypothesis conflicts with the fact that unlike many other neurological diseases in which oxidative stress is implicated (such as Alzheimer's and Parkinson's) [53], Rett Syndrome is not degenerative. Additionally, reintroduction of *Mecp2* into both *Mecp2* null and deficient symptomatic mice models rescued wildtype levels of several oxidative stress markers[5, 66]. One possible explanation for this is that once the initial driver of mitochondrial dysfunction is ameliorated, the brain is able to correct for the accumulation of mitochondrial defects, likely through the major mtDNA repair mechanism, base excision repair. However, further studies are required to determine if this is true, and more generally how the dynamics of cellular stress and cellular stress response work together to produce Rett symptoms without typical neurodegeneration.

Critically, oxidative stress is known to induce senescence, p53 activation, and Oct1 upregulation, both of which we have identified as key features of MECP2<sup>low</sup> neurons. The Oct family, one branch of the POU transcription factors, is a group of transcription factors so named for their characteristic recognition of the octamer DNA element ATGCAAAT. Unlike any of its family members, Oct1 is expressed ubiquitously both temporally and spatially throughout the body [37, 38]. A study on Oct1 deficient mice revealed abnormal expression of many stress related genes as well as hypersensitivity to oxidative stress[38, 39, 67]. Based on the observation that many of the genes dysregulated in response to stress inputs contained human-conserved octamer sequences in their regulatory regions, it is hypothesized that Oct1 may play an important role in regulation of cell-stress response genes. However, other findings suggest that Oct1 may be a direct participant in cellular response pathways[37]. Oct1 has been shown through various studies to interact with multiple stress-response implicated factors. One of these studies found that Oct1 mediates the induction by BRCA1 of the gene GADD45[68]. This is of particular interest since GADD45 is a stress-inducible DNA repair gene regulated by p53[69]. In addition, we found that GADD45 was one of several p53 targets whose expression was upregulated following silencing of MECP2 in neuronal cultures.

Another question not answered by the current study is exactly how loss of MECP2 function can lead to metabolic dysfunction. While MECP2 is known to bind methylated DNA, it is also now clear that MECP2 can bind RNA as well and this protein has been implicated in a panoply of different functions. One could speculate that loss of function of an epigenetic regulator such as MECP2 could disrupt gene regulation of important

metabolic proteins; or perhaps induce a stress response that leads to P53 upregulation and subsequent decrease of metabolic activity in an active effort to diminish ROS levels and allow for repair; or many have argued that MECP2 can regulate gene expression as a DNA binding protein or more recently through its ability to directly bind RNA. Finally, it is tempting to speculate that because epigenetic regulation and metabolism both share similar substrates and products, that perhaps epigenetic regulation in the nucleus leads to an imbalance of substrates available for metabolic enzymes, and therefore metabolic disruption.

Here we found that POU2F1/OCT1 is potentially a key regulator of gene expression in response to loss of MECP2 in Rett brain, and is clearly upregulated in MECP2-null neurons *in vitro*. Furthermore, we probed for potential instigators of OCT1 stabilization and found that metabolic stress and DNA damage can induce OCT1 in normal neurons. Whether OCT1 induction is required for the physiological manifestations associated with Rett disease in patients is an open question. While it does seem likely that OCT1 induction is due to increased stress in neurons lacking MECP2, it is not clear whether blocking OCT1 function in neurons would reverse synaptic transmission defects observed in other studies in response to loss of MECP2. It is also possible that increasing OCT1 further would promote the type of repair or abrogation of stress necessary to promote neurophysiological restoration of MECP2-null neurons. Future effort will be devoted to understanding how OCT1 functionally regulates neuronal stress in Rett brain.

## **Materials and Methods**

**Generation of *in vitro* neurons** First, isogenic Rett Syndrome and wild type iPSCs were derived from Rett patient fibroblasts as described previously [13]. iPSCs were maintained on plates coated with matrigel (Corning) in mTeSR1 (StemCell Technologies) until 80% confluency. Neural progenitor cell (NPC) fate was induced following the manufacturer's protocol. Briefly, 2 million cells were passaged per each well using Accutase (StemCell Technologies) into the STEMdiff SMADi neural induction medium (StemCell Technologies). Cells were passaged this way once a week, two more times to induce NPC fate. Next, NPCs were differentiated to a Cajal-Retzius neuronal cell type using growth factor withdrawal method. EGF and FGF were removed from the media, and the cells were cultured in DMEMF12 supplemented with N2 and B27 (Thermo Fisher).

**Western Blot** Cell lysate was prepared using RIPA buffer (Pierce) supplemented with Halt Protease Inhibitor Cocktail (ThermoFisher Scientific) and Halt Phosphatase Inhibitor Cocktail (ThermoFisher Scientific). Total protein concentration was determined using BCA Protein Assay Kit (ThermoFisher Scientific) following the manufacturer's protocol. Equal protein concentrations were loaded onto the NuPAGE 4-12% Bis-Tris gel (ThermoFisher Scientific) and run at 150 Volts for 90 minutes in running buffer, containing 25 mL of 20x NuPAGE MOPS SDS Running Buffer (ThermoFisher Scientific) and 475 mL of milli-Q water. Next, the protein was transferred onto the nitrocellulose membrane at 30 Volts for 60 minutes in transfer buffer, containing 25 mL 20x NuPAGE Transfer Buffer (ThermoFisher Scientific), 100 mL Methanol (ThermoFisher Scientific), 375 mL milli-Q water. The membrane was blocked overnight at 4°C in OneBlock Western-FL Blocking Buffer (Genesee Scientific), then incubated in the primary antibody at 4°C overnight. The following primary antibodies were used: rabbit MECP2 (Diagenode C15410052, 1:1000),

rabbit anti-histone H3 (Abcam ab1791, 1:1000), rabbit OCT1 (Novus Biologicals NBP2-21584, 1:500), mouse  $\alpha$ -actin (SCBT sc-47778, 1:500). Membrane was washed twice with 0.1% PBST and incubated in anti-rabbit or anti-mouse secondary HRP-labeled secondary antibody (ThermoFisher Scientific 31460, 31430 1:100000) for 1 hour at room temperature. Membrane was washed twice with 0.1% PBST and SuperSignal West Femto Maximum Sensitivity Substrate (ThermoFisher Scientific) was added to the membrane and subjected to film exposure.

**Immunofluorescence and image quantification** Cells grown on coverslips were washed with PBS and fixed with 4% paraformaldehyde (Electron Microscopy Sciences) for 15 minutes at room temperature. Next, the cells were washed with 0.1 % PBST three times and blocked in MAXblock Blocking Medium (Active Motif) for 1 hour at room temperature, then incubated overnight at 4°C in the primary antibody. The following primary antibodies were used: rabbit MECP2 (Diagenode C15410052, 1:1000), rabbit OCT1 (Novus Biologicals NBP2-21584, 1:500), rabbit pATR (Abcam ab227851 1:500). Next, the slides were washed three times with 0.1% PBST and secondary antibody conjugated with Alexa 488, 568, 594 or 647 (1:500, Life Technologies A-21203, A21202, A31571, A-21207) was used, accompanied by DAPI (Invitrogen 1:500). Slides were then washed three times with 0.1% PBST and mounted using Prolong Gold (Invitrogen). Mean fluorescent intensity was quantified using ImageJ.

**Cytospin** Sorted nuclei were injected into the cytofunnel and spun down at 600 rpm for 15 minutes. Next, the nuclei were fixed with 4% paraformaldehyde following the immunofluorescence procedure.

**UV irradiation** Cell culture media was exchanged for PBS and the cells were placed in the GS GENE LINKER UV chamber (Bio-Rad). The irradiation was set to 100 mJ for 45 seconds. Next, the cells were washed with PBS and growth factor withdrawal media was applied. 4 hours later the cells were fixed for immunofluorescence.

**Disruption of mitochondrial function** Cells were washed with PBS and treated with either DMSO, 1 uM Phenformin, 20 uM Phenformin, 0.1 uM Rotenone or 5 uM Rotenone for three days. Media was changed every day.

**C13 labeled glucose incorporation** Cells were fed with DMEM (ThermoFisher Scientific) supplemented with 4 mM glutamine (ThermoFisher Scientific), 1 mM pyruvate (ThermoFisher Scientific), and 10 mM C13 labeled glucose (Cambridge Isotope Laboratories). 24 hours later the cells were washed twice with ammonium acetate (ThermoFisher Scientific) on ice and 80% methanol (ThermoFisher Scientific) was added to the cells. The plates were placed in -80C for 15 minutes. Next, the cells were scraped off the plate into eppendorf tubes, vortexed and centrifuged at 17000 g for 10 minutes at 4C. The methanol was then evaporated using the EZ-Lite evaporator. Dried samples were analyzed using Mass Spectrometry.

**Seahorse Assay** Cell were plated at a density 50,000-90,000 cells per well in a XF96 microplate (Agilent) and placed in the 37oC 5% CO2 incubator overnight. The next day, the cells were washed twice with the assay medium (Dulbecco's Modified Eagle's Medium supplemented with 10 mM glucose, 2 mM L-glutamine, 1 mM pyruvate and 5 mM HEPES,

pH 7.4), and the microplate was placed in a 37°C incubator without CO<sub>2</sub>. 30 minutes later, the plate was loaded into the Seahorse XF96 Extracellular Flux Analyzer (Agilent Technologies). The following compounds were injected during the assay: 2 µM oligomycin, 0.75 and 1.35 µM FCCP; 2 µM rotenone and antimycin A. When the measurements were done, cells were fixed with 4% paraformaldehyde, stained with Hoechst, and cell number per well was determined using an Operetta High-Content Imaging System (PerkinElmer). Oxygen consumption rates (OCR) were normalized to cell number per well.

**Nuclei isolation from frozen brain samples** Nuclei were isolated as described previously (Krishnaswami et al. 2016). Briefly, brain tissue was cut on ice using a scalpel and homogenized in a glass dounce. The homogenate was then filtered through a 40 µm cell strainer and centrifuged at 1000g for 8 min at 4°C. The pellet was resuspended in a homogenization buffer and mixed with equal amounts of iodixanol. This mixture was then gently placed in a new tube over a 29% iodixanol. The nuclei were centrifuged at 13500g for 20 min at 4°C. The pellet was resuspended in the immunostaining buffer and incubated for 15 min at 4°C. Next, primary antibody was added to the nuclei pellet and incubated on a rotator at 4°C for 40 min. The following primary antibodies were used: rabbit MECP2 (Diagenode C15410052, 1:250), chicken Neun (Millipore Sigma MAB377 1:250). Nuclei were centrifuged at 400 g for 5 min at 4 °C and washed with PBS/BSA twice. Secondary antibodies conjugated with Alexa 488 and 594 (1:500, Life Technologies A-21203, A21202) were added, accompanied by DAPI (Invitrogen 1:500), the nuclei were incubated on a rotator at 4°C for 30 min. Immunostained nuclei were subjected to FACS.



**Library Preparation and Sequencing** Sorted nuclei were delivered to the UCLA Technology Center for Genomics & Bioinformatics where libraries for RNA sequencing were prepared. The samples were sequenced using NovaSeq 6000 S2 PE 2x50 with 50,000 reads per cell.

**Single-cell RNA-sequencing analysis** Aligned counts were clustered using Seurat v3 and the standard clustering pipeline and parameters. Clustermarkers were calculated using the Wilcoxon rank sum test to compare distributions across individual clusters and the rest of the population. All differential expression analyses were also calculated using the Wilcoxon rank sum test. Venn diagrams were generated using bioVenn. Cite: BioVenn - a web application for the comparison and visualization of biological lists using area-proportional Venn diagrams T. Hulsen, J. de Vlieg and W. Alkema, BMC Genomics 2008, 9 (1): 488. Gene ontology visualizations were generated using ggplot2, with geometric points and a scaled color gradient.

**Transcription factor binding site enrichment analysis** Analysis was performed using the DIRE tool <https://dire.dcode.org>.

**Gene ontology analysis** Analysis was performed using Metascape, a Gene Annotation & Analysis Resource <https://metascape.org/gp/index.html#/main/step1>.

## Figures and Legends

**Figure 1. A method to isolate and molecularly profile MECP2<sup>hi</sup> and MECP2<sup>low</sup> neurons from Rett brain** (A) The diagram depicts the process of nuclei isolation that employs sucrose gradient and a number of washes and centrifugations followed by immunostaining and FACS. (B) Immunostaining of the sorted MECP2<sup>hi</sup> and MECP2<sup>low</sup> neuronal nuclei after cytopspin from Rett patient brain shows a decrease in MECP2 expression in the MECP2<sup>low</sup> fraction, images taken at 40x. (right), quantification of IF signal. Statistical significance was checked using a paired t-test, where \*  $p < 0.05$ , \*\*  $p < 0.01$ , \*\*\*  $p < 0.001$ , \*\*\*\*  $p < 0.0001$ . (C) Western blot analysis verifying a decrease in MECP2 expression in the MECP2<sup>low</sup> fraction isolated by FACS. (D) UMAP showing 19 clusters identified during the analysis of RNA-seq. MECP2<sup>low</sup> (MUT) and MECP2<sup>hi</sup> (WT) nuclei contribute to multiple identified clusters, expressing excitatory and inhibitory neuronal subtypes. (E) UMAP plots of abundant neuronal subtypes as defined by the indicated markers. (F) Proportions of neuronal subtypes in MECP2<sup>hi</sup>, MECP2<sup>low</sup> and WT nuclei from three independent experiments. Mutant (MECP2-Mutant nuclei from Rett brain), WT (MECP2-wild type nuclei from Rett brain), Normal (wild type nuclei from wild type brain).

**Figure 2. Transcriptome analysis reveals alteration in synaptic and metabolic gene expression due to lack of MECP2** (A) Venn diagram showing the number of overlapping genes in several excitatory and inhibitory neuronal populations between our data and a published data set from the Greenberg lab. (B) Venn diagram showing the number of genes that overlap between our excitatory and inhibitory neuronal populations. (C) A summary of the number of Differentially Expressed Genes (DEGs) in several of the

main cell types. **(D)** Gene ontology (GO) analysis of misregulated pathways indicate significant alterations in synaptic and metabolic gene expression in both excitatory (left) and inhibitory (right) MECP2<sup>low</sup> neurons. **(E)** GO analysis of sc-RNA-seq data from MECP2 null transgenic brain neurons.

**Figure 3. POU2F1/OCT1 is one of the most enriched potential regulators of genes altered in Rett patient brain MECP2<sup>low</sup> neurons** **(A)** Analysis of the transcription factor binding sites within the genes significantly altered due to lack of MECP2 shows POU2F1/OCT1 binding site enrichment (Measured by DIRE algorithm). y-axis indicates the percentage of genes containing a conserved binding site for a particular transcription factor. **(B)** Same analysis as in **(A)**, but using the Greenberg Rett dataset. **(C)** Same analysis as in **(A)**, but performed on bulk-RNA-seq DEGs from Gogliotti et al. **(D)** Expression of the enriched potential regulators of genes altered in MECP2<sup>low</sup> neurons by brain region. Analysis of Rett patient derived *in vitro* neurons shows enrichment of POU2F1/OCT1 binding sites within the differentially expressed genes.

**Figure 4. POU2F1/OCT1 expression is induced in neurons lacking MECP2 *in vitro*** **(A)** DIRE analysis on RNA-seq data from Rett neurons *in vitro* showed enrichment for OCT1 binding sites in DEGs. **(B)** Left, immunostaining shows significantly higher expression of POU2F1/OCT1 in patient derived Rett neurons compared to the wild type, 40x. Right, quantification of the immunostaining. **(C)** Western blot shows that POU2F1/OCT1 is induced in two independently derived Rett cell lines compared to two wild types.

**Figure 5. POU2F1/OCT1 is induced in wild type neurons upon DNA damage and disruption of mitochondrial function *in vitro*** (A) Left, schematic of UV irradiation of wild type neurons. Middle, immunostaining showing that phosphorylation of ATR increases in neurons upon UV irradiation, indicating DNA damage, 40x. Right, quantification of the immunostaining. (B) Left, immunostaining showing that Induction of DNA damage in wild type neurons leads to elevated expression of POU2F1/OCT1 protein, 40x. Right, quantification of the immunostaining (C) Immunostaining showing that wild type neurons treated with 20 uM Phenformin or 5 uM Rotenone which leads to a disruption of mitochondrial function, induce of POU2F1/OCT1 expression, 40x. (D) Quantification of the immunostaining, POU2F1/OCT1 is induced upon Phenformin or Rotenone treatment in a concentration dependent manner.

**Figure 6. Rett neurons exhibit metabolic dysfunction *in vitro*** (A) Lack of MECP2 in patient derived neurons leads to a decreased incorporation of C13 labeled glucose into the citric acid cycle. (B) Pathway enrichment showing the processes most affected by the metabolic dysfunction in Rett neurons. x-axis is the number of times a particular pathway came up as affected during the analysis. (C) Oxygen consumption rate is decreased in Rett neurons as detected by the Seahorse assay. (D) Rett neurons also exhibit decreased ATP consumption rate. (E) Analysis of transcription factor binding sites within significantly changed metabolic genes revealed POU2F1/OCT1 as being one of the potential regulators of these genes. (F) GSEA analysis of Rett neurons from patient brain predicts diminished activity of TCA cycle in most identifiable neuronal subtypes in Rett brain.

## Supplemental Figure Legends

**Supplemental Figure 1. Quality control analysis of the single cell data** (A) A violin plot showing the number of counts per cell in the Drop Seq and 10x data. (B) Number of genes per cell in each sample. (C) Percent mitochondrial reads per cell in each sample. (D) Number of cells detected in each sample.

**Supplemental Figure 2. Reanalysis of published sc-RNA-seq data** (A) Left, the diagram depicts the process of nuclei isolation employed by the Greenberg group followed by immunostaining and FACS. Right, UMAP showing 12 unique clusters identified during the reanalysis of the data. (B) GO analysis of misregulated pathways shows similar trend to our 10x data, with synaptic and metabolic gene expression being altered due to lack of MECP2. (C) GO analysis of DEGs from mouse knock out model shows downregulation of genes related to synapse while inflammation related genes are upregulated due to lack of Mecp2.

**Supplemental Figure 3. POU2F1/OCT1 is one of the most enriched potential regulators of genes altered in the Aging brain** DIRE analysis on RNA-seq data from the Aging brain showed enrichment for OCT1 binding sites in DEGs.

## References

1. Amir, R.E., et al., *Rett syndrome is caused by mutations in X-linked MECP2, encoding methyl-CpG-binding protein 2*. Nat Genet, 1999. **23**(2): p. 185-8,
2. Moretti, P. and H.Y. Zoghbi, *MeCP2 dysfunction in Rett syndrome and related disorders*. Curr Opin Genet Dev, 2006. **16**(3): p. 276-81,

3. Akbarian, S., et al., *Expression pattern of the Rett syndrome gene MeCP2 in primate prefrontal cortex*. Neurobiol Dis, 2001. **8**(5): p. 784-91,
4. Fyffe, S.L., et al., *Deletion of Mecp2 in Sim1-expressing neurons reveals a critical role for MeCP2 in feeding behavior, aggression, and the response to stress*. Neuron, 2008. **59**(6): p. 947-58.PMC2597031
5. Giacometti, E., et al., *Partial rescue of MeCP2 deficiency by postnatal activation of MeCP2*. Proc Natl Acad Sci U S A, 2007. **104**(6): p. 1931-6.1794312
6. Luikenhuis, S., et al., *Expression of MeCP2 in postmitotic neurons rescues Rett syndrome in mice*. Proc Natl Acad Sci U S A, 2004. **101**(16): p. 6033-8.395918
7. Chen, R.Z., et al., *Deficiency of methyl-CpG binding protein-2 in CNS neurons results in a Rett-like phenotype in mice*. Nat Genet, 2001. **27**(3): p. 327-31,
8. Kinde, B., et al., *Reading the unique DNA methylation landscape of the brain: Non-CpG methylation, hydroxymethylation, and MeCP2*. Proc Natl Acad Sci U S A, 2015. **112**(22): p. 6800-6.PMC4460470
9. Wen, L. and F. Tang, *Genomic distribution and possible functions of DNA hydroxymethylation in the brain*. Genomics, 2014. **104**(5): p. 341-6,
10. Guy, J., et al., *The role of MeCP2 in the brain*. Annu Rev Cell Dev Biol, 2011. **27**: p. 631-52,
11. Cohen, S., et al., *Genome-wide activity-dependent MeCP2 phosphorylation regulates nervous system development and function*. Neuron, 2011. **72**(1): p. 72-85.PMC3226708
12. Marchetto, M.C., et al., *A model for neural development and treatment of Rett syndrome using human induced pluripotent stem cells*. Cell, 2010. **143**(4): p. 527-39.3003590
13. Ohashi, M., et al., *Loss of MECP2 Leads to Activation of P53 and Neuronal Senescence*. Stem Cell Reports, 2018. **10**(5): p. 1453-1463.PMC5995366
14. Squillaro, T., et al., *Partial silencing of methyl cytosine protein binding 2 (MECP2) in mesenchymal stem cells induces senescence with an increase in damaged DNA*. FASEB J, 2010. **24**(5): p. 1593-603,
15. Squillaro, T., et al., *A case report: bone marrow mesenchymal stem cells from a Rett syndrome patient are prone to senescence and show a lower degree of apoptosis*. J Cell Biochem, 2008. **103**(6): p. 1877-85,
16. Renthal, W., et al., *Characterization of human mosaic Rett syndrome brain tissue by single-nucleus RNA sequencing*. Nat Neurosci, 2018. **21**(12): p. 1670-1679.PMC6261686
17. Quaderi, N.A., et al., *Genetic and physical mapping of a gene encoding a methyl CpG binding protein, Mecp2, to the mouse X chromosome*. Genomics, 1994. **22**(3): p. 648-51,
18. Habib, N., et al., *Massively parallel single-nucleus RNA-seq with DroNc-seq*. Nat Methods, 2017. **14**(10): p. 955-958.PMC5623139
19. Macosko, E.Z., et al., *Highly Parallel Genome-wide Expression Profiling of Individual Cells Using Nanoliter Droplets*. Cell, 2015. **161**(5): p. 1202-14.PMC4481139
20. Joly, J.H., W.E. Lowry, and N.A. Graham, *Differential Gene Set Enrichment Analysis: A statistical approach to quantify the relative enrichment of two gene sets*. Bioinformatics, 2020,
21. Flores, A., et al., *Lactate dehydrogenase activity drives hair follicle stem cell activation*. Nat Cell Biol, 2017. **19**(9): p. 1017-1026.PMC5657543

22. Ito-Ishida, A., et al., *Loss of MeCP2 in Parvalbumin-and Somatostatin-Expressing Neurons in Mice Leads to Distinct Rett Syndrome-like Phenotypes*. *Neuron*, 2015. **88**(4): p. 651-8.PMC4656196
23. Tomassy, G.S., et al., *Developmental abnormalities of cortical interneurons precede symptoms onset in a mouse model of Rett syndrome*. *J Neurochem*, 2014. **131**(1): p. 115-27,
24. Baker, S.A., et al., *An AT-hook domain in MeCP2 determines the clinical course of Rett syndrome and related disorders*. *Cell*, 2013. **152**(5): p. 984-96.PMC3641682
25. Lang, M., et al., *Selective preservation of MeCP2 in catecholaminergic cells is sufficient to improve the behavioral phenotype of male and female Mecp2-deficient mice*. *Hum Mol Genet*, 2013. **22**(2): p. 358-71,
26. Panayotis, N., et al., *Morphological and functional alterations in the substantia nigra pars compacta of the Mecp2-null mouse*. *Neurobiol Dis*, 2011. **41**(2): p. 385-97,
27. Samaco, R.C., et al., *Loss of MeCP2 in aminergic neurons causes cell-autonomous defects in neurotransmitter synthesis and specific behavioral abnormalities*. *Proc Natl Acad Sci U S A*, 2009. **106**(51): p. 21966-71.PMC2799790
28. Smrt, R.D., et al., *Mecp2 deficiency leads to delayed maturation and altered gene expression in hippocampal neurons*. *Neurobiol Dis*, 2007. **27**(1): p. 77-89.2789309
29. Tudor, M., et al., *Transcriptional profiling of a mouse model for Rett syndrome reveals subtle transcriptional changes in the brain*. *Proc Natl Acad Sci U S A*, 2002. **99**(24): p. 15536-41.137752
30. Guy, J., et al., *A mouse Mecp2-null mutation causes neurological symptoms that mimic Rett syndrome*. *Nat Genet*, 2001. **27**(3): p. 322-6,
31. Squillaro, T., et al., *Senescence Phenomena and Metabolic Alteration in Mesenchymal Stromal Cells from a Mouse Model of Rett Syndrome*. *Int J Mol Sci*, 2019. **20**(10).PMC6567034
32. Alessio, N., et al., *Neural stem cells from a mouse model of Rett syndrome are prone to senescence, show reduced capacity to cope with genotoxic stress, and are impaired in the differentiation process*. *Exp Mol Med*, 2018. **50**(3): p. 1.PMC6118406
33. Huang, J.L., et al., *MeCP2 prevents age-associated cognitive decline via restoring synaptic plasticity in a senescence-accelerated mouse model*. *Aging Cell*, 2021: p. e13451,
34. Can, K., et al., *Neuronal Redox-Imbalance in Rett Syndrome Affects Mitochondria as Well as Cytosol, and Is Accompanied by Intensified Mitochondrial O<sub>2</sub> Consumption and ROS Release*. *Front Physiol*, 2019. **10**: p. 479.PMC6503037
35. Zhou, J., et al., *Age-related Changes in the Global DNA Methylation Profile of Oligodendrocyte Progenitor Cells Derived from Rat Spinal Cords*. *Curr Med Sci*, 2019. **39**(1): p. 67-74,
36. Cianfaglione, R., et al., *Ageing in Rett syndrome*. *J Intellect Disabil Res*, 2016. **60**(2): p. 182-90,
37. Kang, J., et al., *A general mechanism for transcription regulation by Oct1 and Oct4 in response to genotoxic and oxidative stress*. *Genes Dev*, 2009. **23**(2): p. 208-22.PMC2648538
38. Kang, J., A. Shakya, and D. Tantin, *Stem cells, stress, metabolism and cancer: a drama in two Octs*. *Trends Biochem Sci*, 2009. **34**(10): p. 491-9,

39. Vazquez-Arreguin, K., et al., *Oct1/Pou2f1 is selectively required for colon regeneration and regulates colon malignancy*. PLoS Genet, 2019. **15**(5): p. e1007687.PMC6522070
40. Jafek, J.L., et al., *Transcription factor Oct1 protects against hematopoietic stress and promotes acute myeloid leukemia*. Exp Hematol, 2019. **76**: p. 38-48 e2,
41. Chambers, S.M., et al., *Highly efficient neural conversion of human ES and iPS cells by dual inhibition of SMAD signaling*. Nat Biotechnol, 2009. **27**(3): p. 275-80,
42. Maroof, A.M., et al., *Directed differentiation and functional maturation of cortical interneurons from human embryonic stem cells*. Cell stem cell, 2013. **12**(5): p. 559-72,
43. Kang, J., et al., *Regulation of Oct1/Pou2f1 transcription activity by O-GlcNAcylation*. FASEB J, 2013. **27**(7): p. 2807-17.PMC3688745
44. Kang, J., et al., *Dynamic regulation of Oct1 during mitosis by phosphorylation and ubiquitination*. PLoS One, 2011. **6**(8): p. e23872.PMC3163677
45. Lauri, A., G. Pompilio, and M.C. Capogrossi, *The mitochondrial genome in aging and senescence*. Ageing Res Rev, 2014. **18**: p. 1-15,
46. Subramanian, A., et al., *Gene set enrichment analysis: a knowledge-based approach for interpreting genome-wide expression profiles*. Proc Natl Acad Sci U S A, 2005. **102**(43): p. 15545-50.1239896
47. Cai, J., et al., *Modeling co-expression across species for complex traits: insights to the difference of human and mouse embryonic stem cells*. PLoS computational biology, 2010. **6**(3): p. e1000707.2837392
48. Mucerino, S., et al., *Alterations in the carnitine cycle in a mouse model of Rett syndrome*. Sci Rep, 2017. **7**: p. 41824.PMC5288798
49. Alvarez-Saavedra, M., et al., *Cell-specific expression of wild-type MeCP2 in mouse models of Rett syndrome yields insight about pathogenesis*. Hum Mol Genet, 2007. **16**(19): p. 2315-25,
50. Lin, M., et al., *Heat shock alters the expression of schizophrenia and autism candidate genes in an induced pluripotent stem cell model of the human telencephalon*. PLoS ONE, 2014. **9**(4): p. e94968.3988108
51. Stevens, H.E., et al., *Prenatal stress delays inhibitory neuron progenitor migration in the developing neocortex*. Psychoneuroendocrinology, 2013. **38**(4): p. 509-21.PMC3532962
52. Morrison, R.S., et al., *Neuronal survival and cell death signaling pathways*. Adv Exp Med Biol, 2002. **513**: p. 41-86,
53. Farley, M.M. and T.A. Watkins, *Intrinsic Neuronal Stress Response Pathways in Injury and Disease*. Annu Rev Pathol, 2018. **13**: p. 93-116,
54. Solleiro-Villavicencio, H. and S. Rivas-Arancibia, *Effect of Chronic Oxidative Stress on Neuroinflammatory Response Mediated by CD4(+)T Cells in Neurodegenerative Diseases*. Front Cell Neurosci, 2018. **12**: p. 114.PMC5934485
55. Cortelazzo, A., et al., *Proteomic analysis of the Rett syndrome experimental model mecp2(Q63X) mutant zebrafish*. J Proteomics, 2017. **154**: p. 128-133,
56. Ishikawa, F., *Cellular senescence as a stress response*. Cornea, 2006. **25**(10 Suppl 1): p. S3-6,
57. Kriaucionis, S., et al., *Gene expression analysis exposes mitochondrial abnormalities in a mouse model of Rett syndrome*. Mol Cell Biol, 2006. **26**(13): p. 5033-42.PMC1489175



58. Gibson, J.H., et al., *Downstream targets of methyl CpG binding protein 2 and their abnormal expression in the frontal cortex of the human Rett syndrome brain*. BMC Neurosci, 2010. **11**: p. 53.PMC2881102
59. Pecorelli, A., et al., *Genes related to mitochondrial functions, protein degradation, and chromatin folding are differentially expressed in lymphomonocytes of Rett syndrome patients*. Mediators Inflamm, 2013. **2013**: p. 137629.PMC3876710
60. Jagtap, S., et al., *Aberrant mitochondrial function in patient-derived neural cells from CDKL5 deficiency disorder and Rett syndrome*. Hum Mol Genet, 2019. **28**(21): p. 3625-3636.PMC6927463
61. Shulyakova, N., et al., *Mitochondrial Dysfunction in the Pathogenesis of Rett Syndrome: Implications for Mitochondria-Targeted Therapies*. Front Cell Neurosci, 2017. **11**: p. 58.PMC5348512
62. Chinnery, P.F., et al., *Point mutations of the mtDNA control region in normal and neurodegenerative human brains*. Am J Hum Genet, 2001. **68**(2): p. 529-32.PMC1235287
63. Chinnery, P.F. and D.M. Turnbull, *Mitochondrial DNA mutations in the pathogenesis of human disease*. Mol Med Today, 2000. **6**(11): p. 425-32,
64. Lee, K.L., et al., *Attenuating brain inflammation, ischemia, and oxidative damage by hyperbaric oxygen in diabetic rats after heat stroke*. J Formos Med Assoc, 2013. **112**(8): p. 454-62,
65. Haas, R.H., et al., *Oxidative metabolism in Rett syndrome: 1. Clinical studies*. Neuropediatrics, 1995. **26**(2): p. 90-4,
66. Sztainberg, Y., et al., *Reversal of phenotypes in MECP2 duplication mice using genetic rescue or antisense oligonucleotides*. Nature, 2015. **528**(7580): p. 123-6,
67. Matthaei, J., et al., *OCT1 Deficiency Affects Hepatocellular Concentrations and Pharmacokinetics of Cycloguanil, the Active Metabolite of the Antimalarial Drug Proguanil*. Clin Pharmacol Ther, 2019. **105**(1): p. 190-200,
68. Fan, W., et al., *BRCA1 regulates GADD45 through its interactions with the OCT-1 and CAAT motifs*. J Biol Chem, 2002. **277**(10): p. 8061-7,
69. Salvador, J.M., J.D. Brown-Clay, and A.J. Fornace, Jr., *Gadd45 in stress signaling, cell cycle control, and apoptosis*. Adv Exp Med Biol, 2013. **793**: p. 1-19,

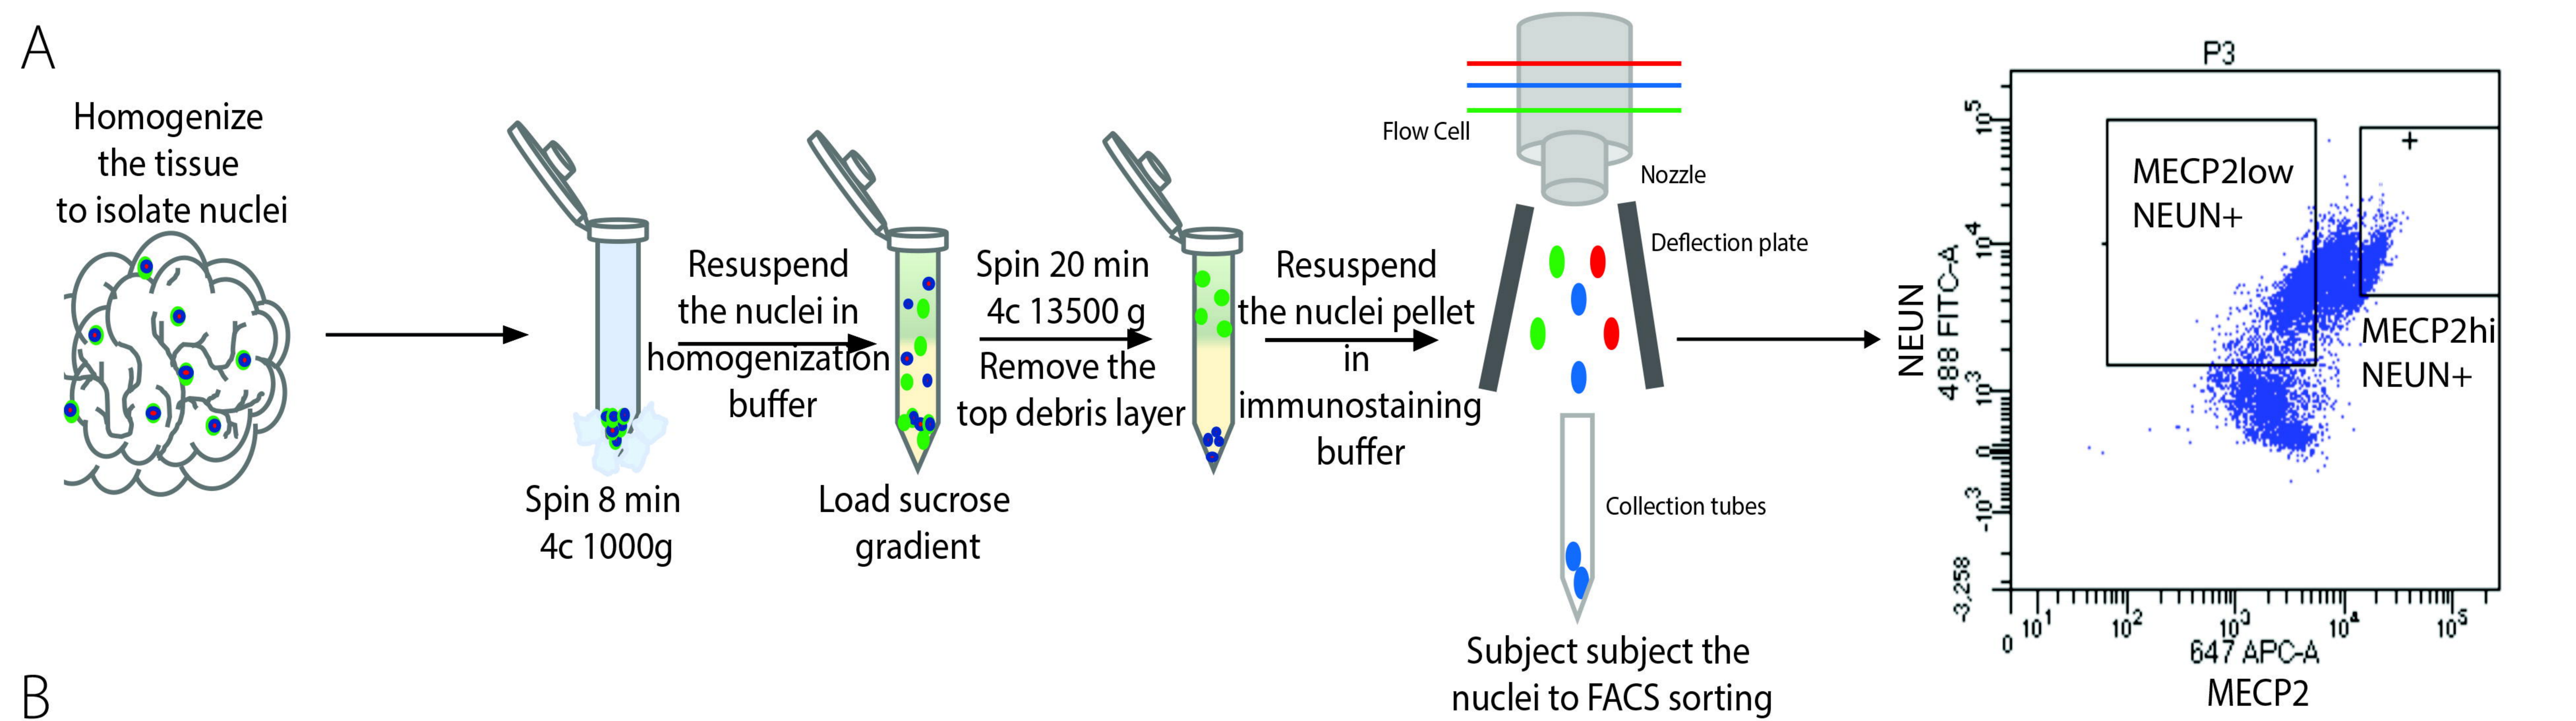

**B**

NEUN+/MECP2+ NEUN+/MECP2-

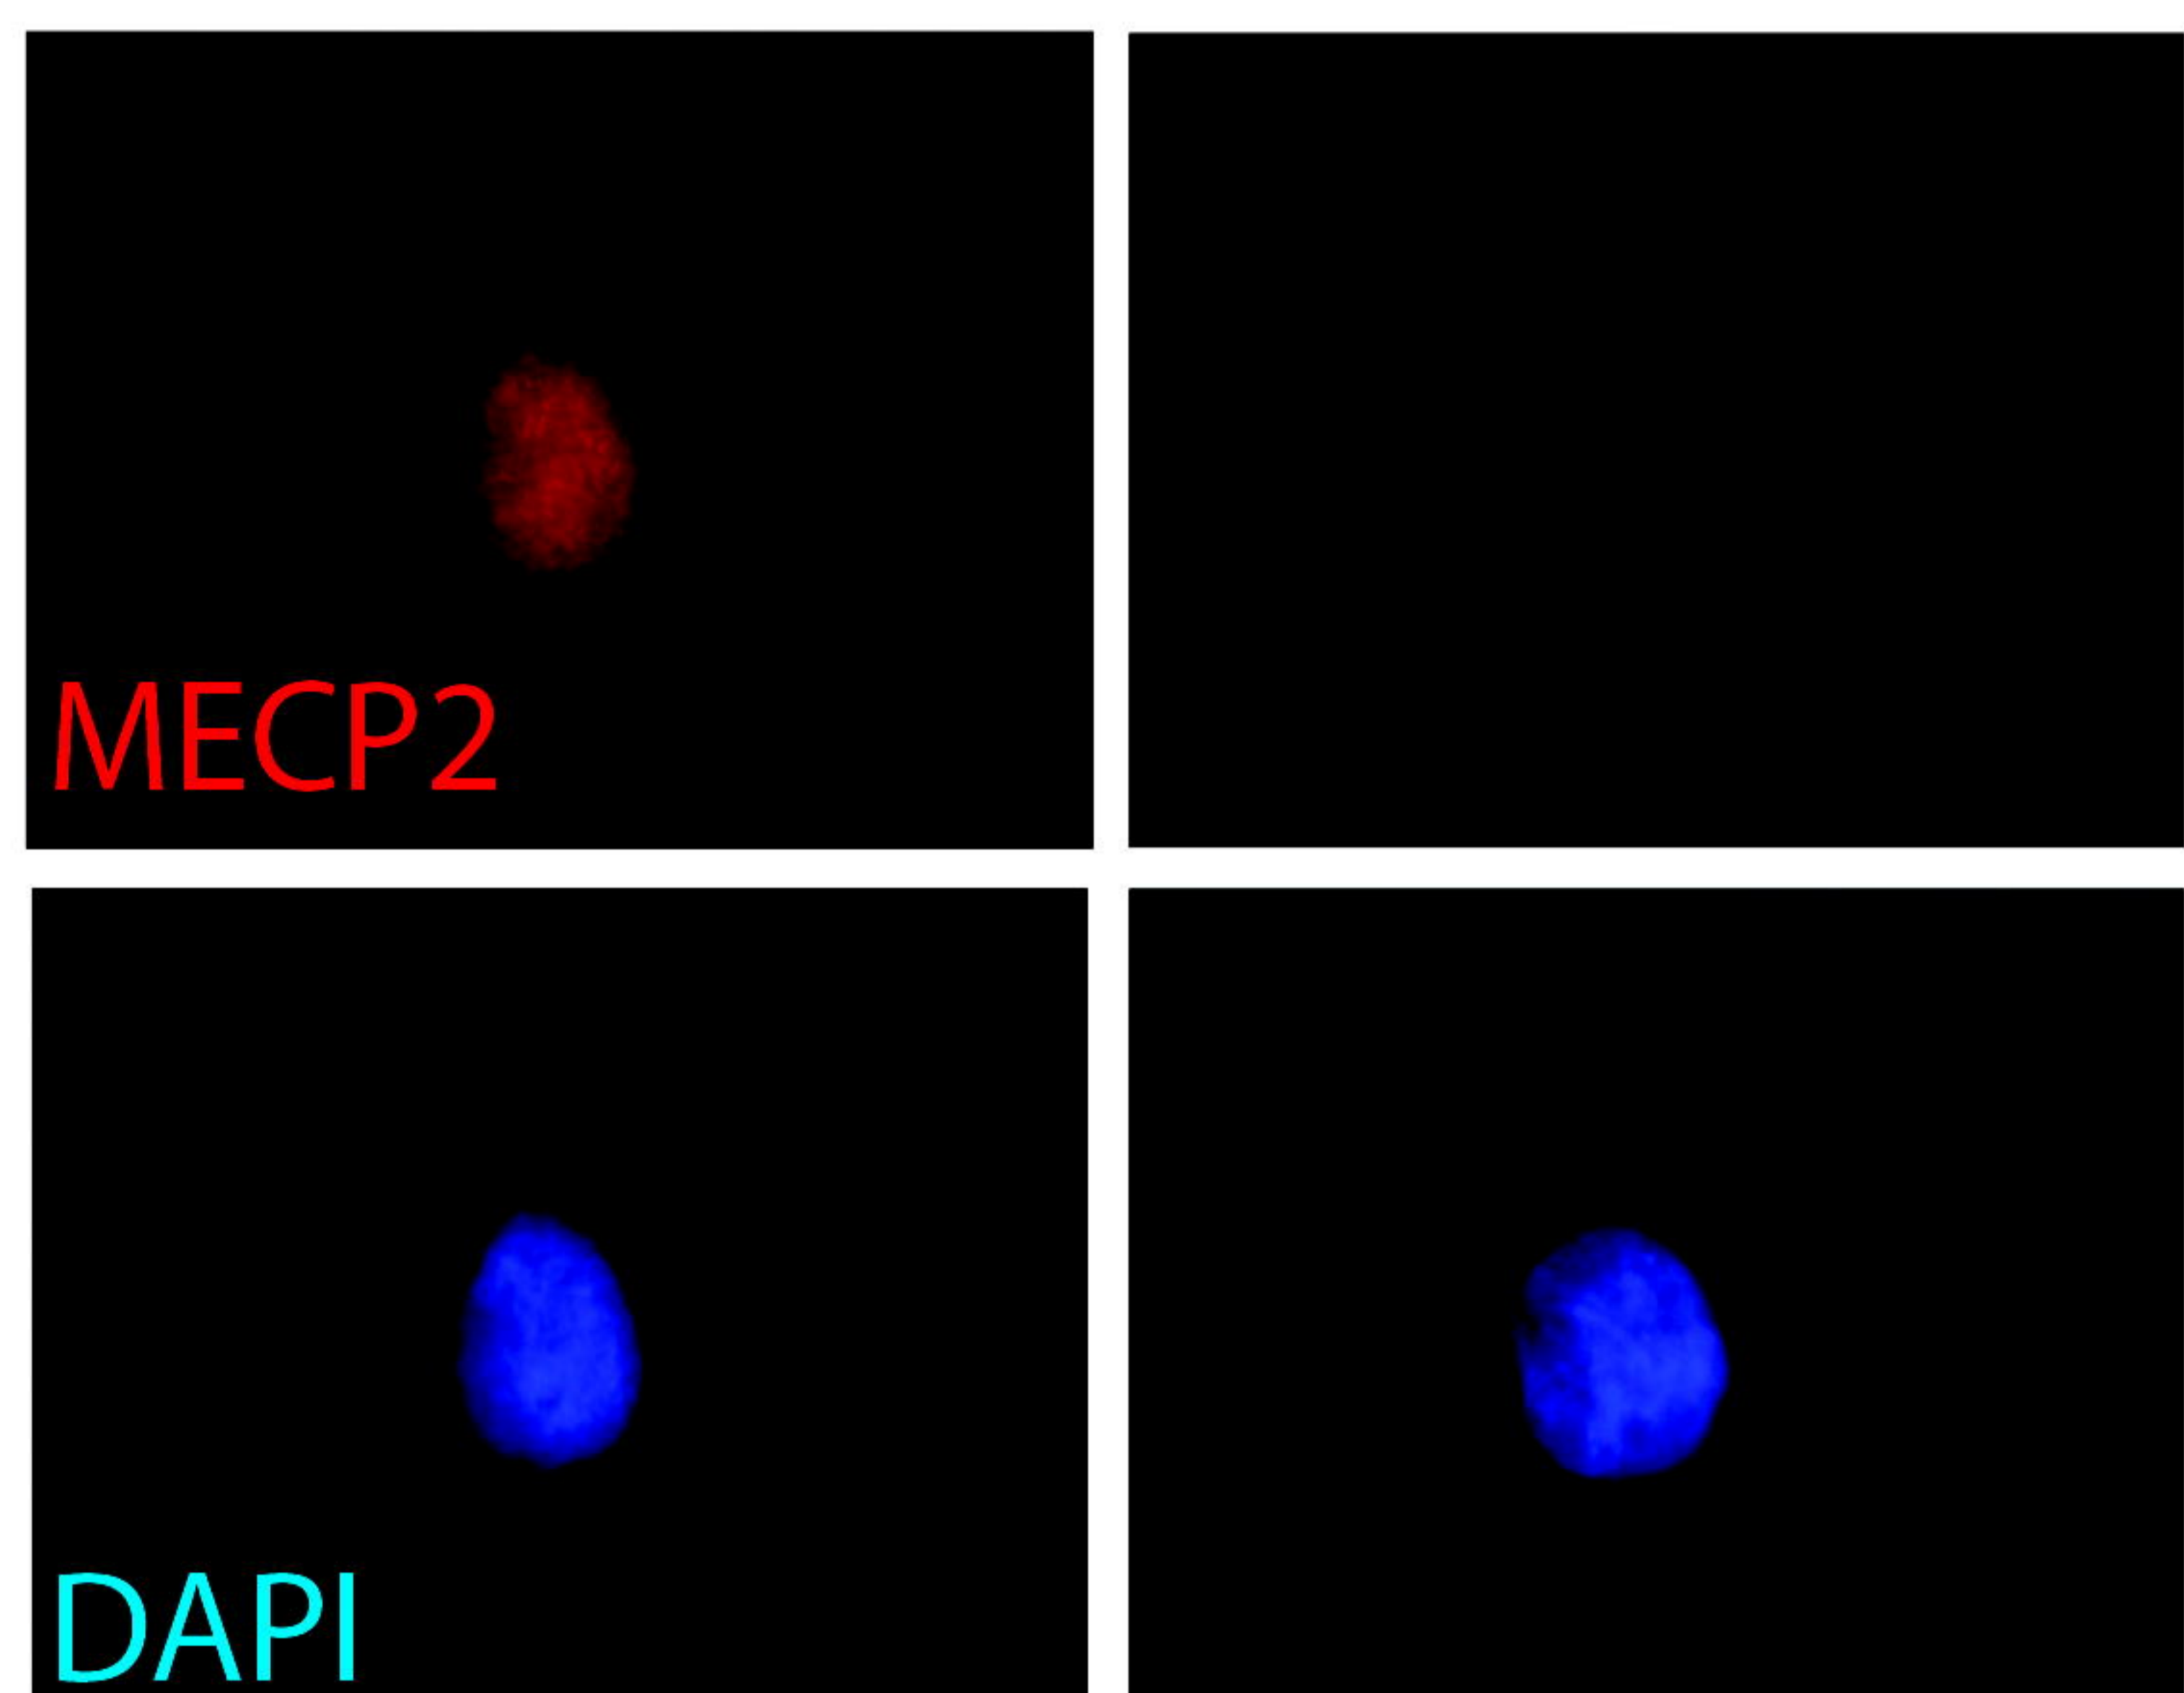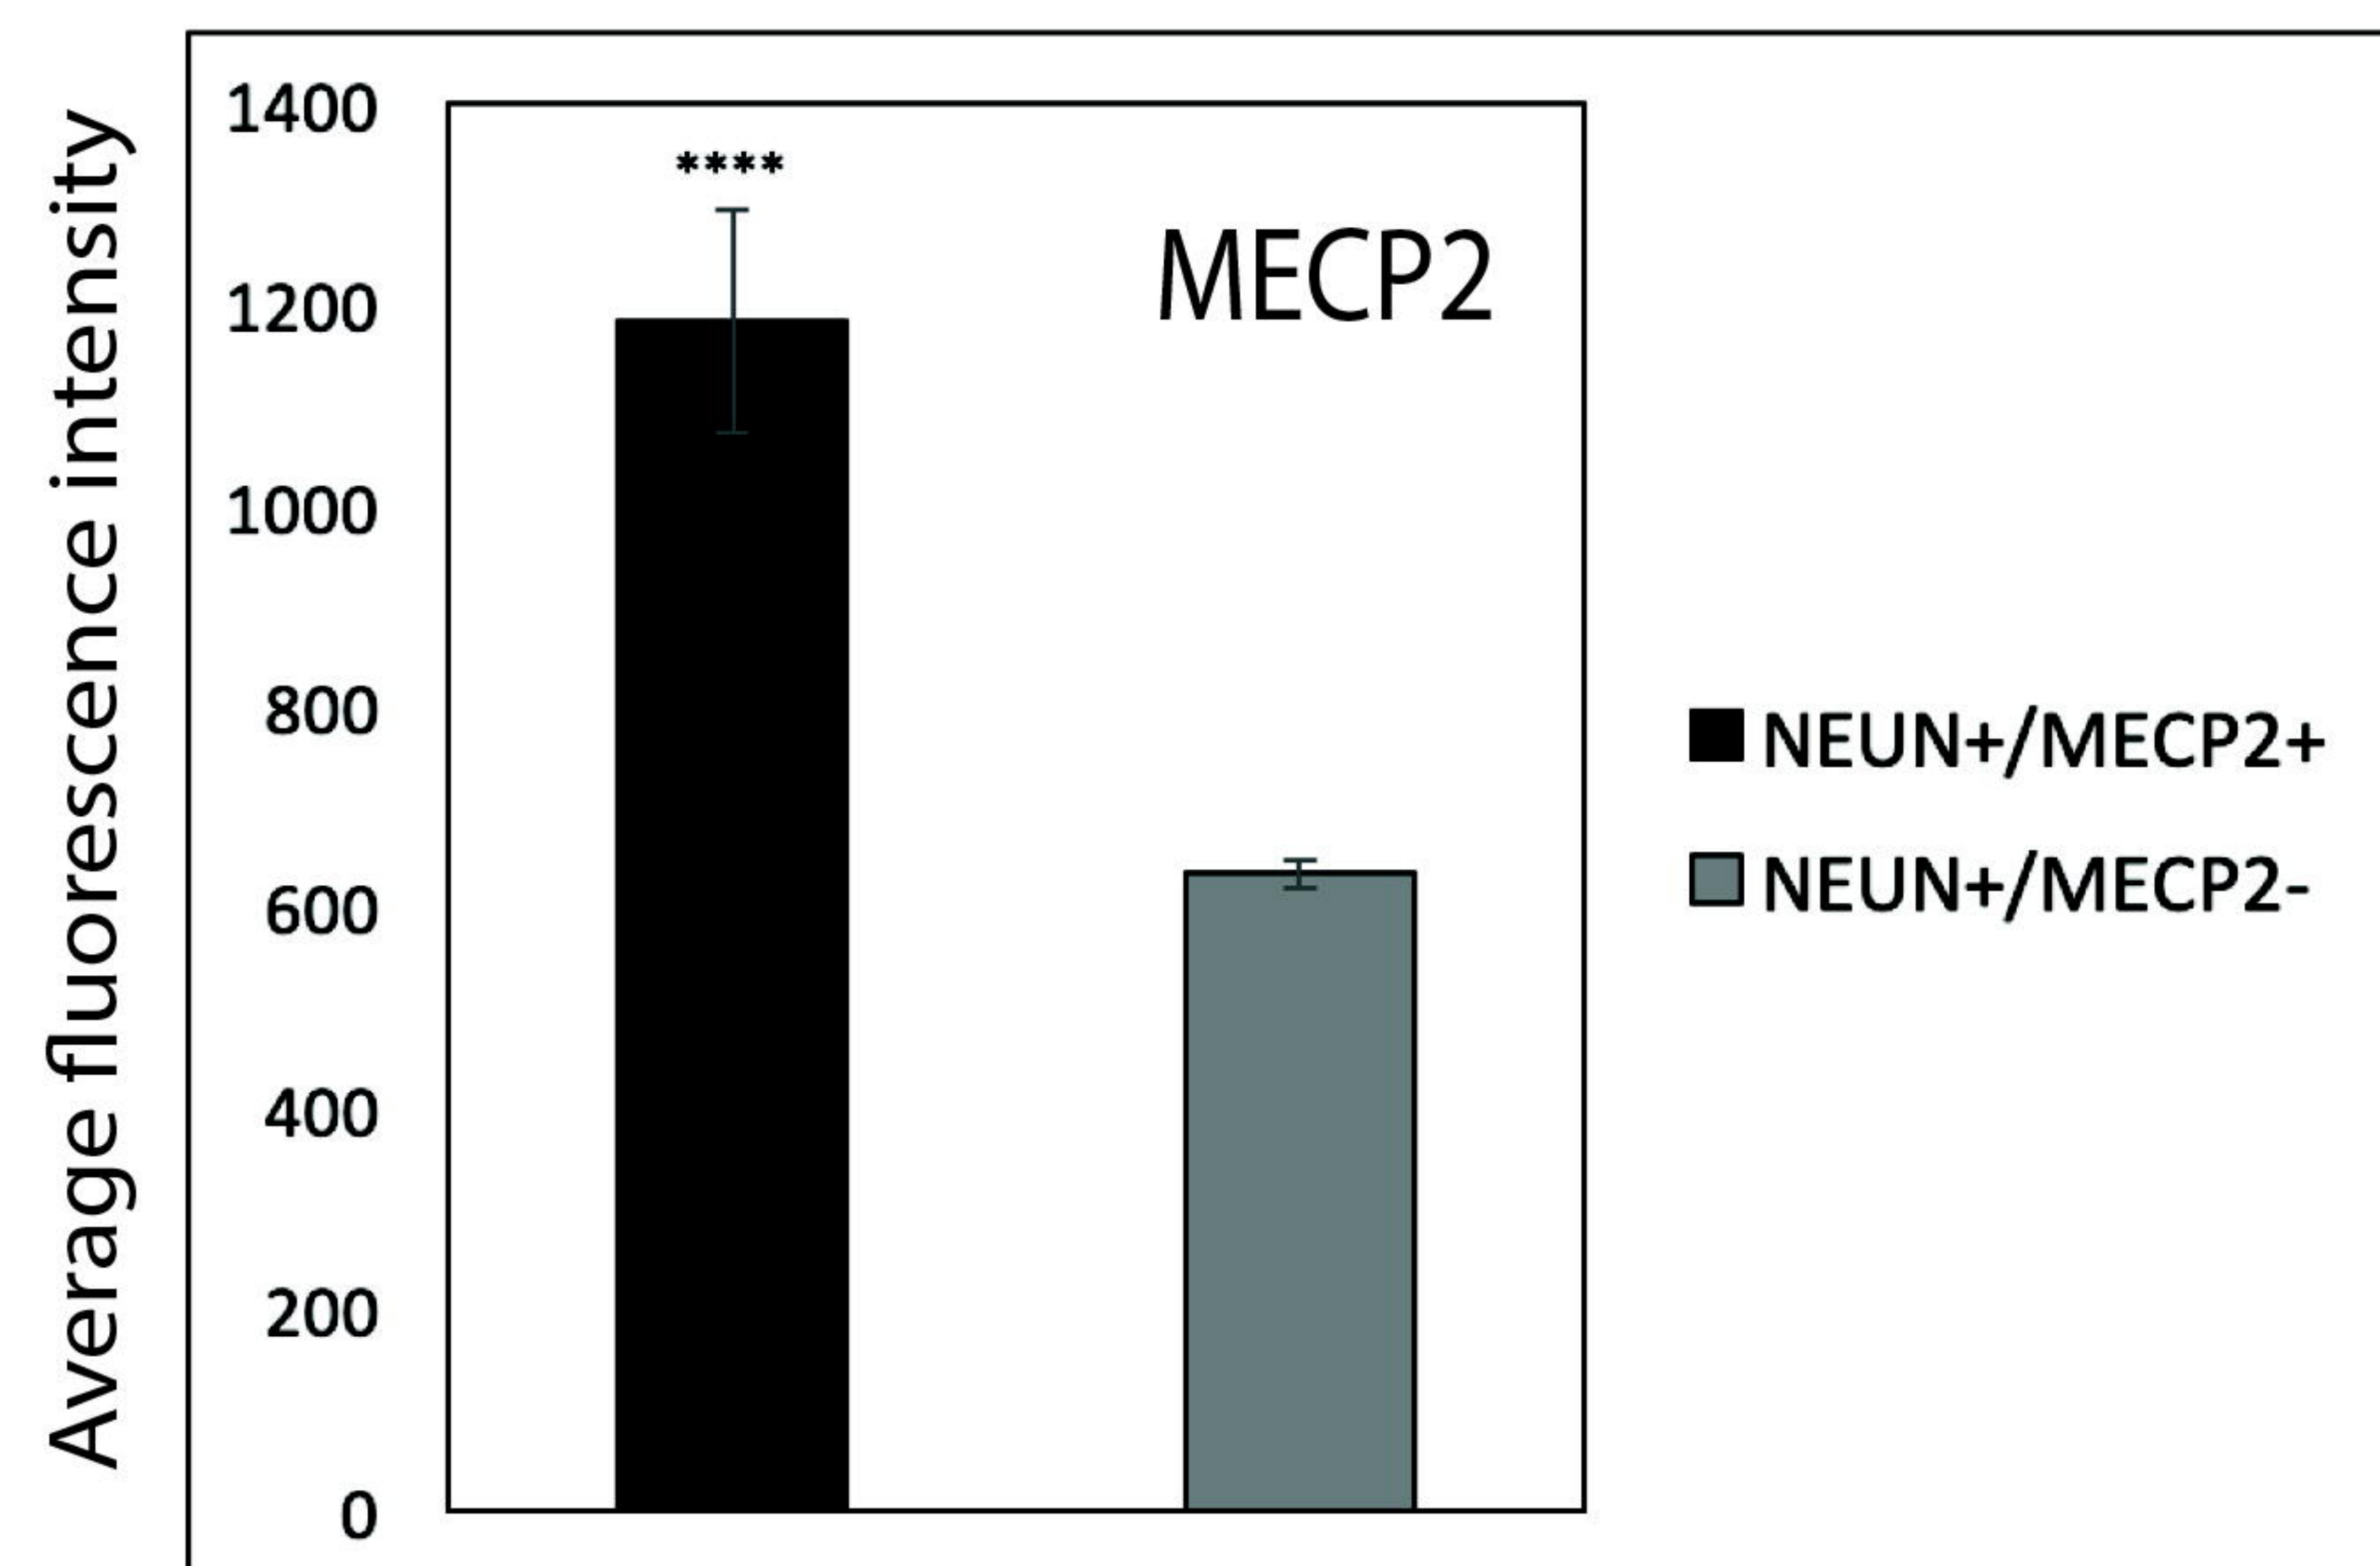

**C**

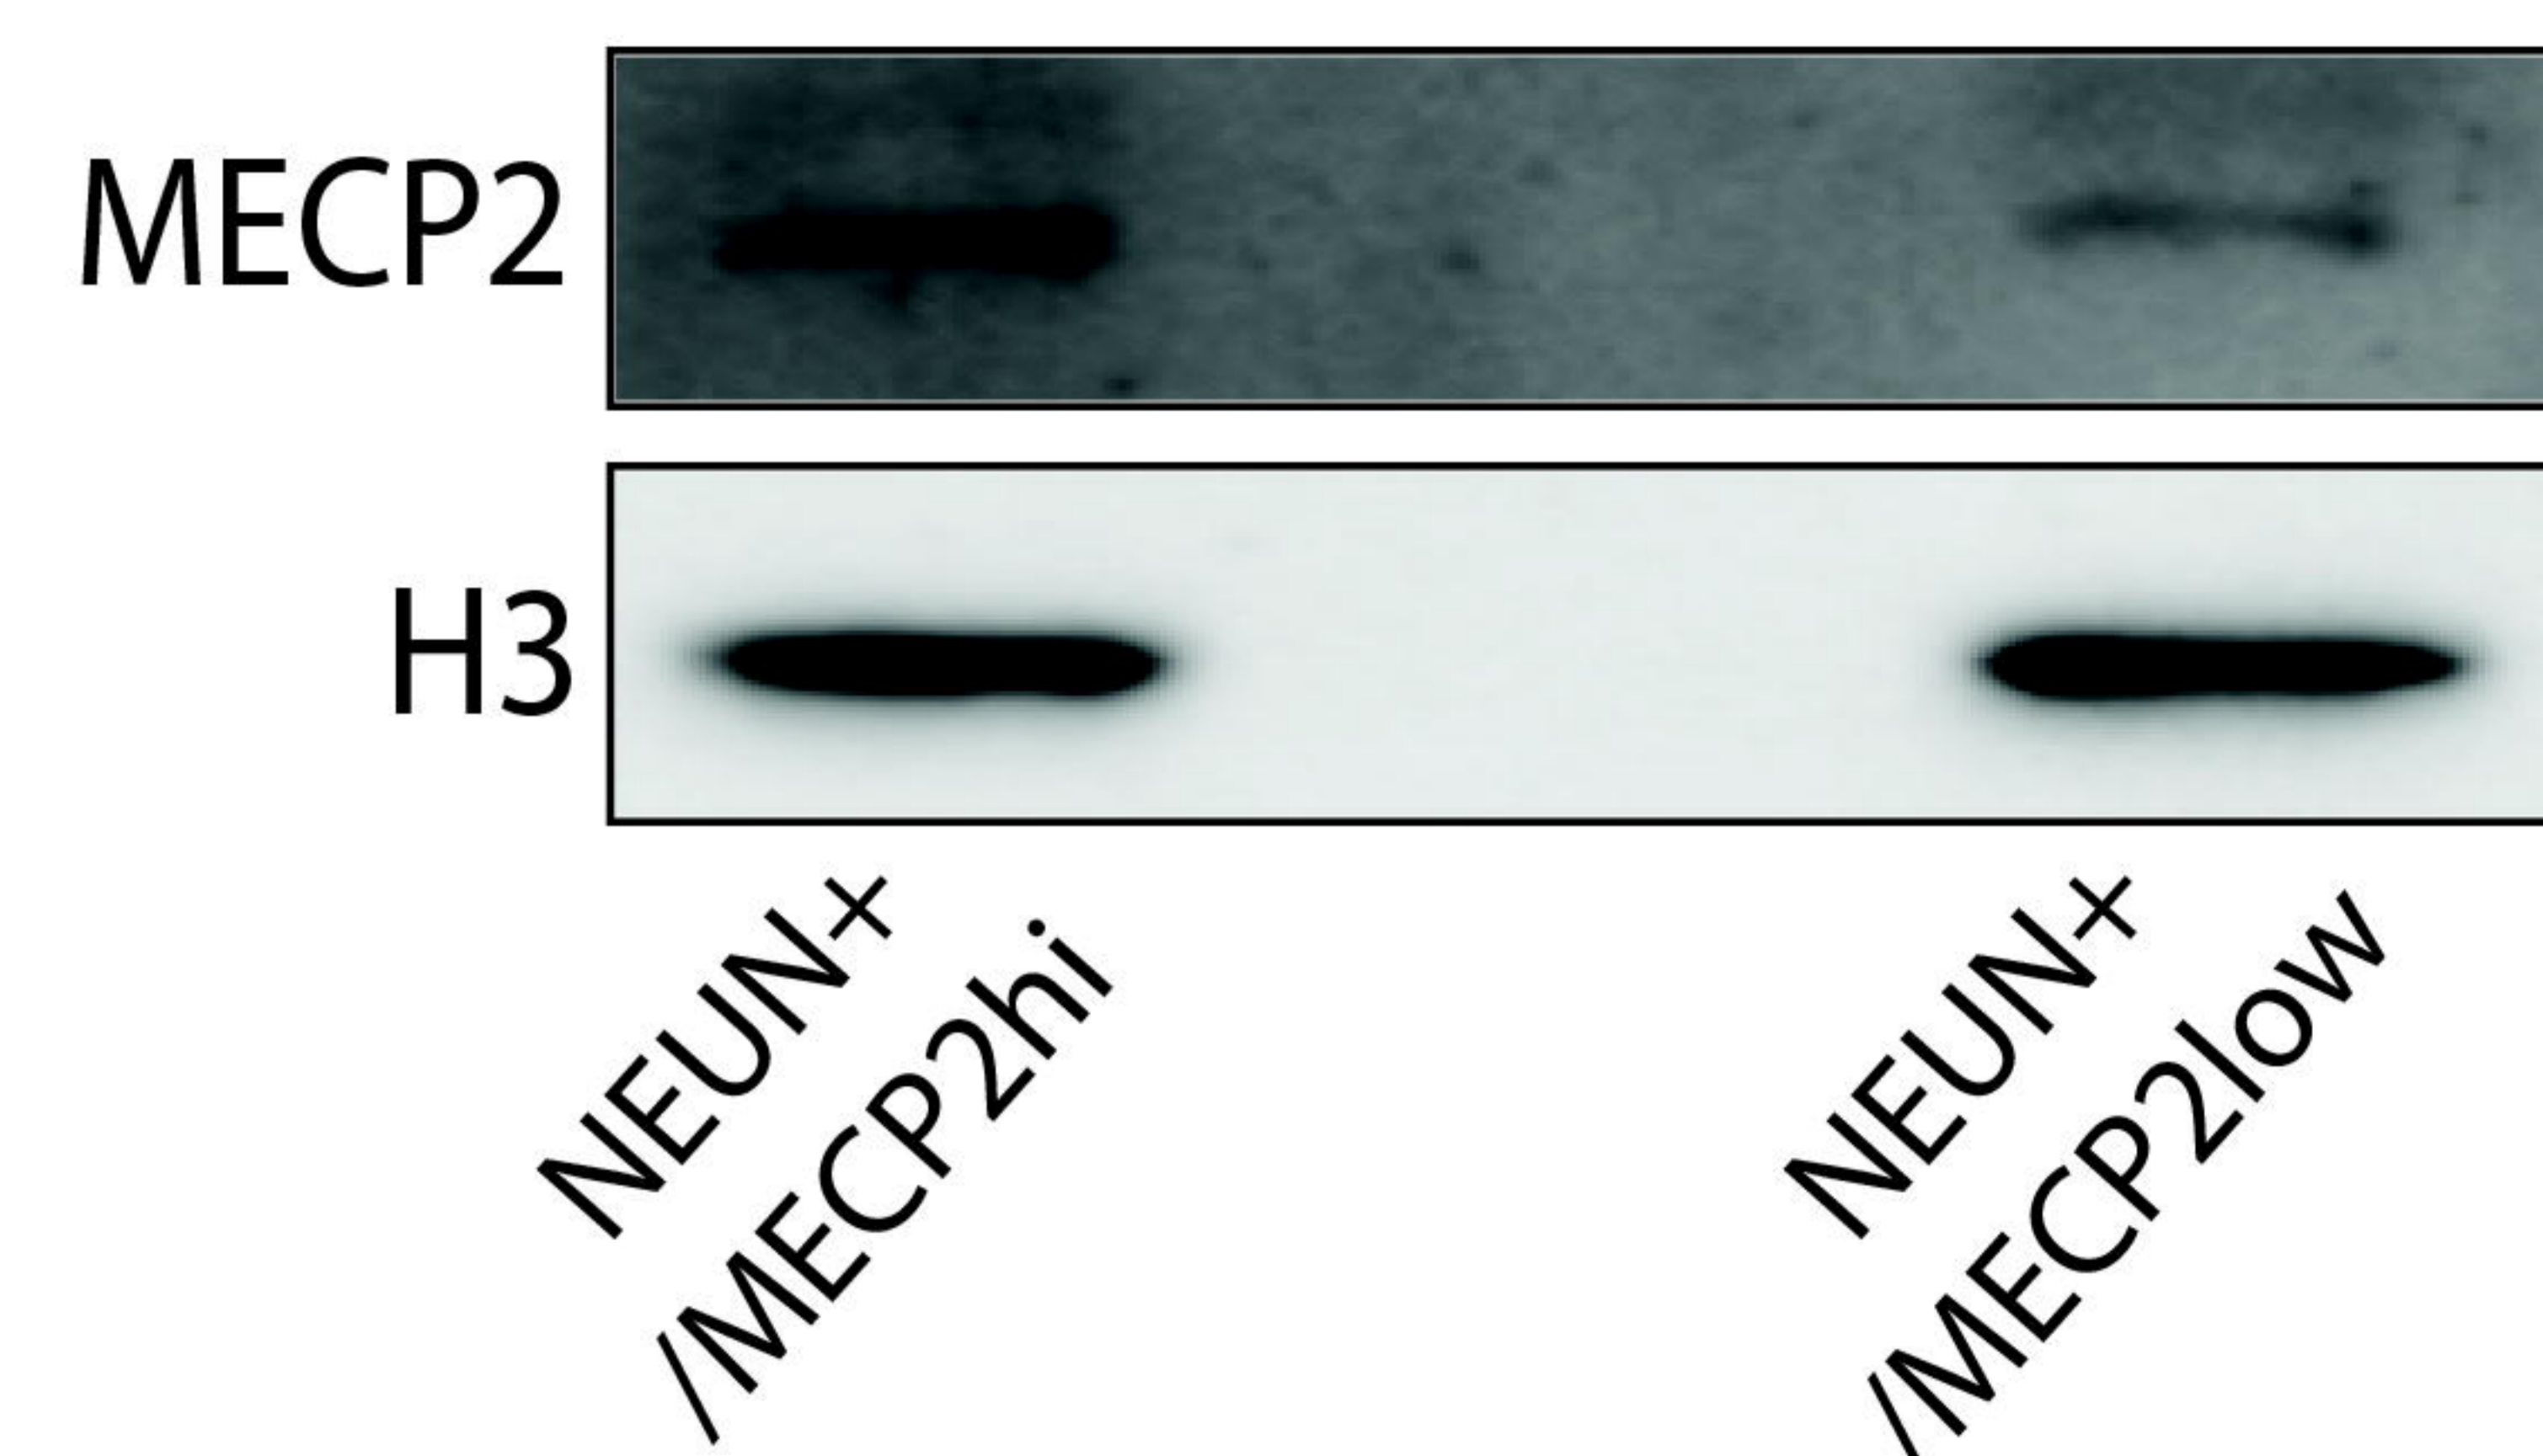

**D**

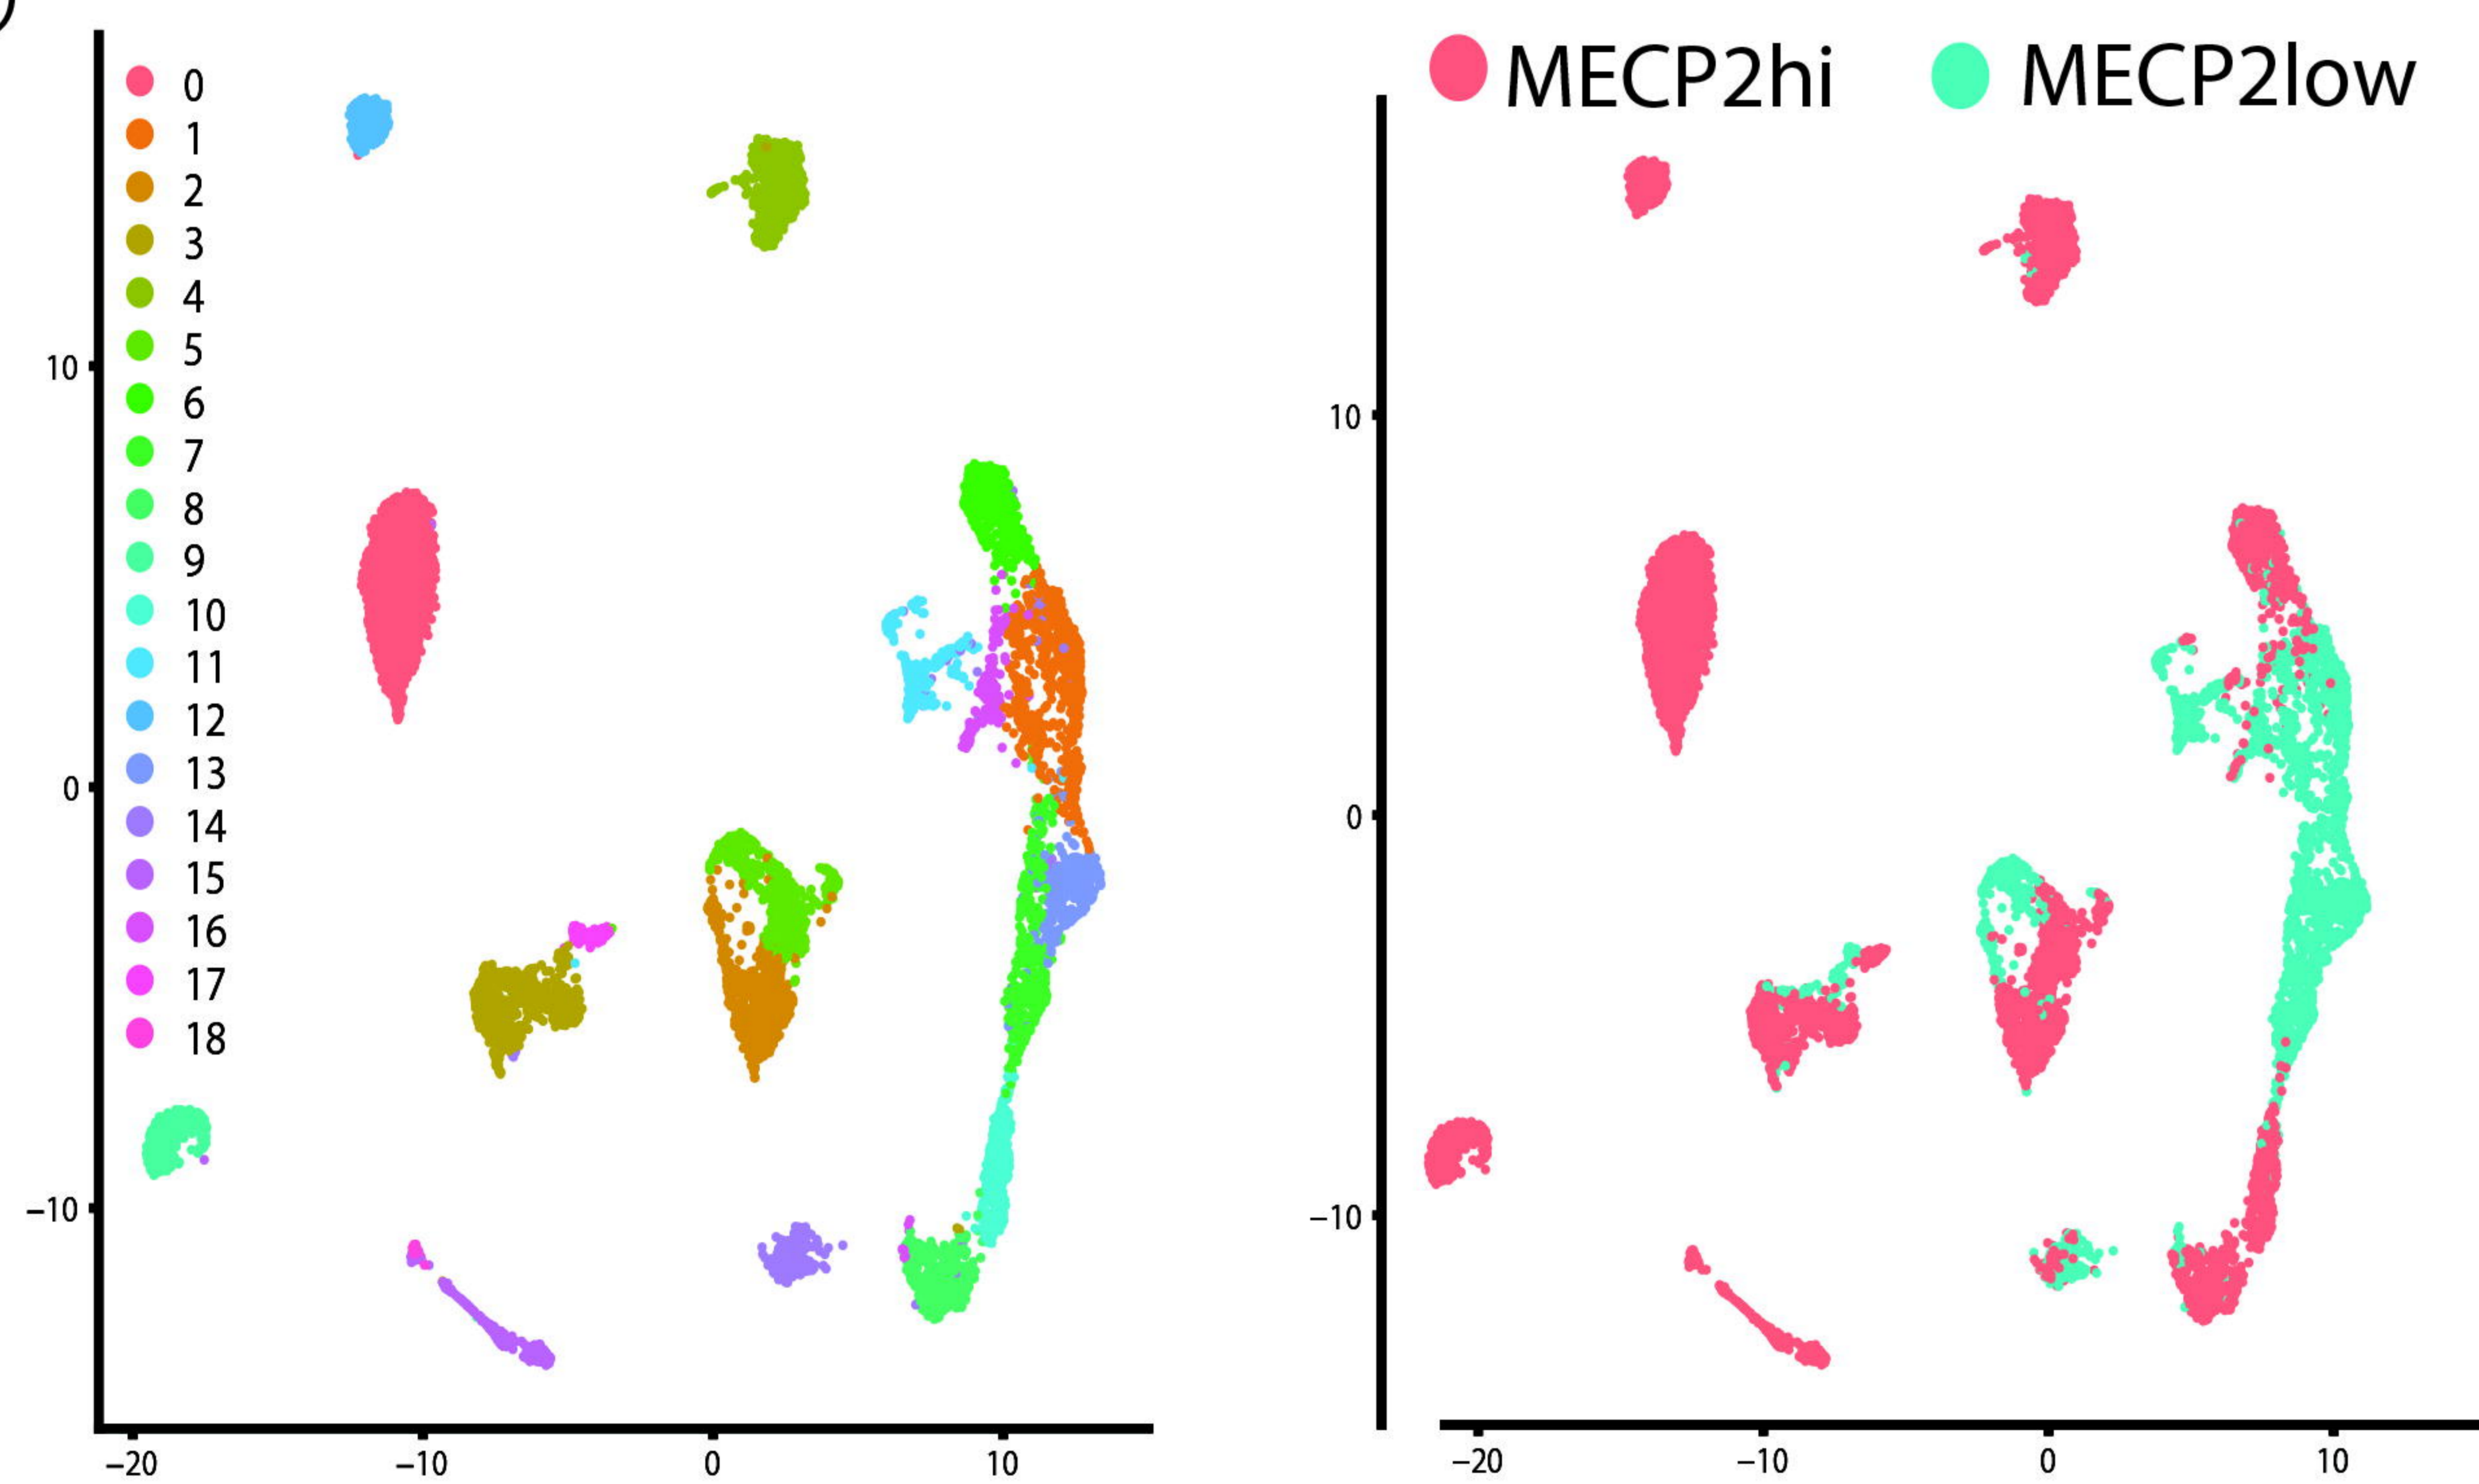

**E**

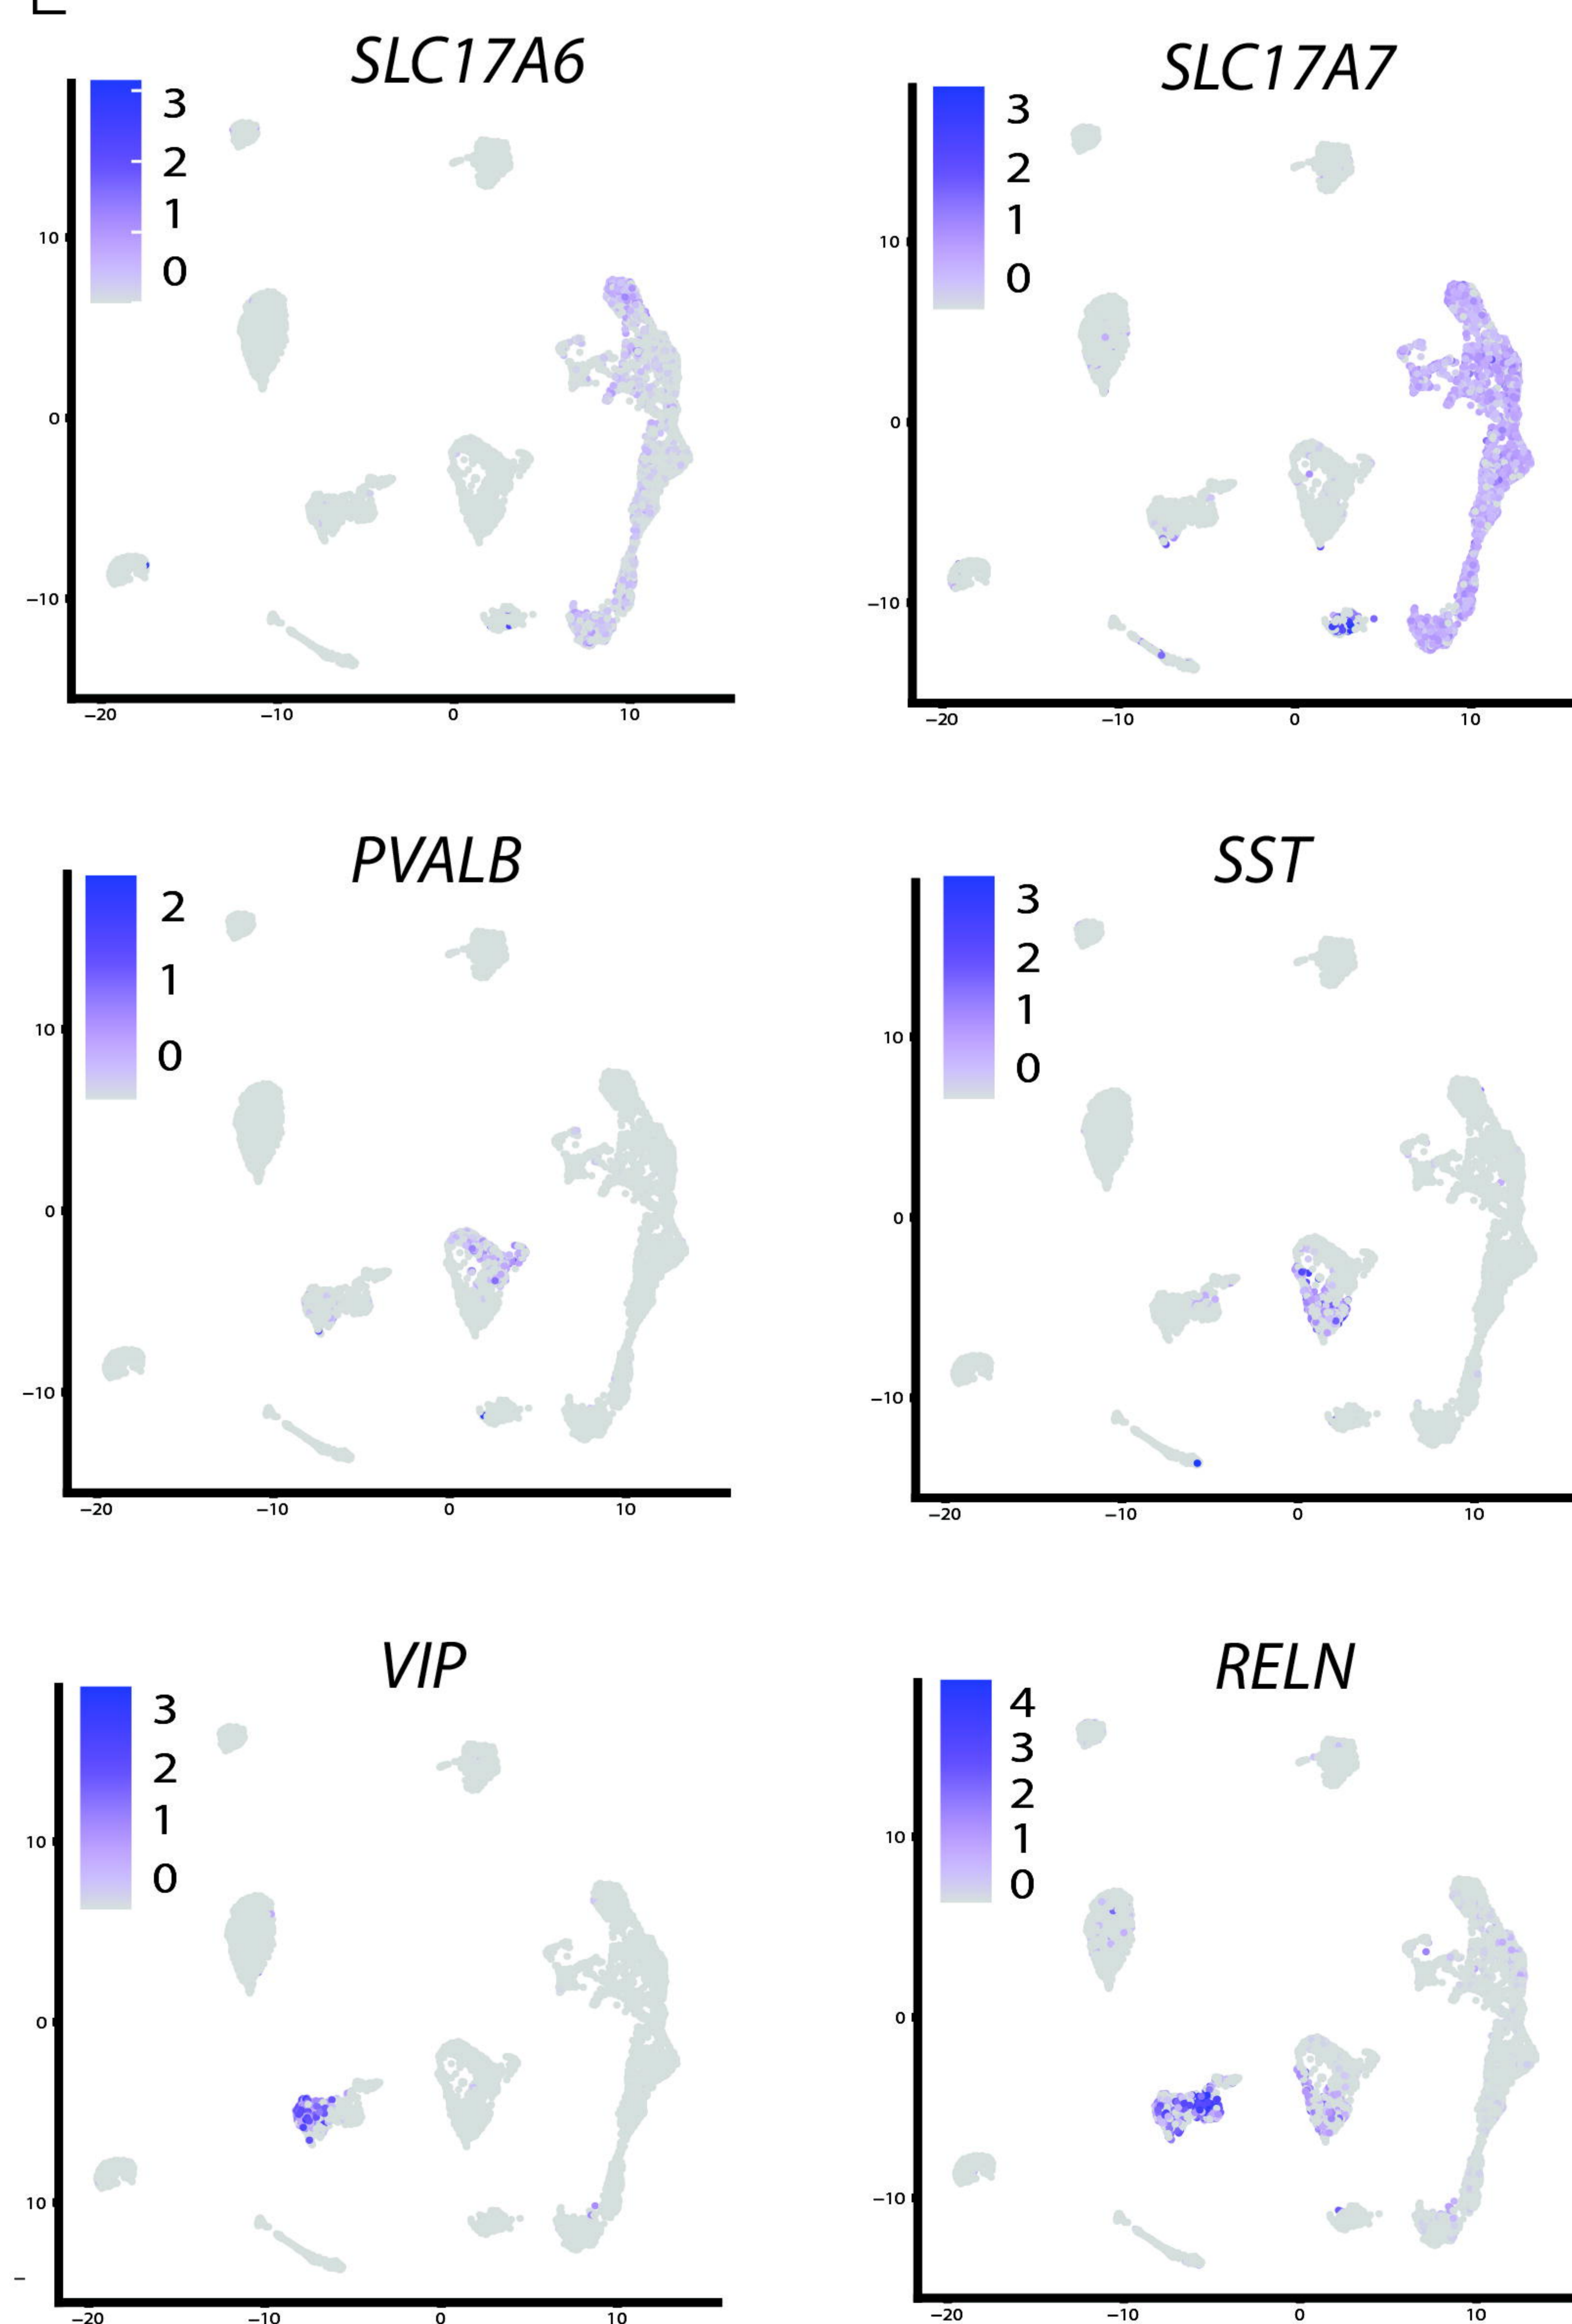

**F** Subtype Composition in Rett Brain

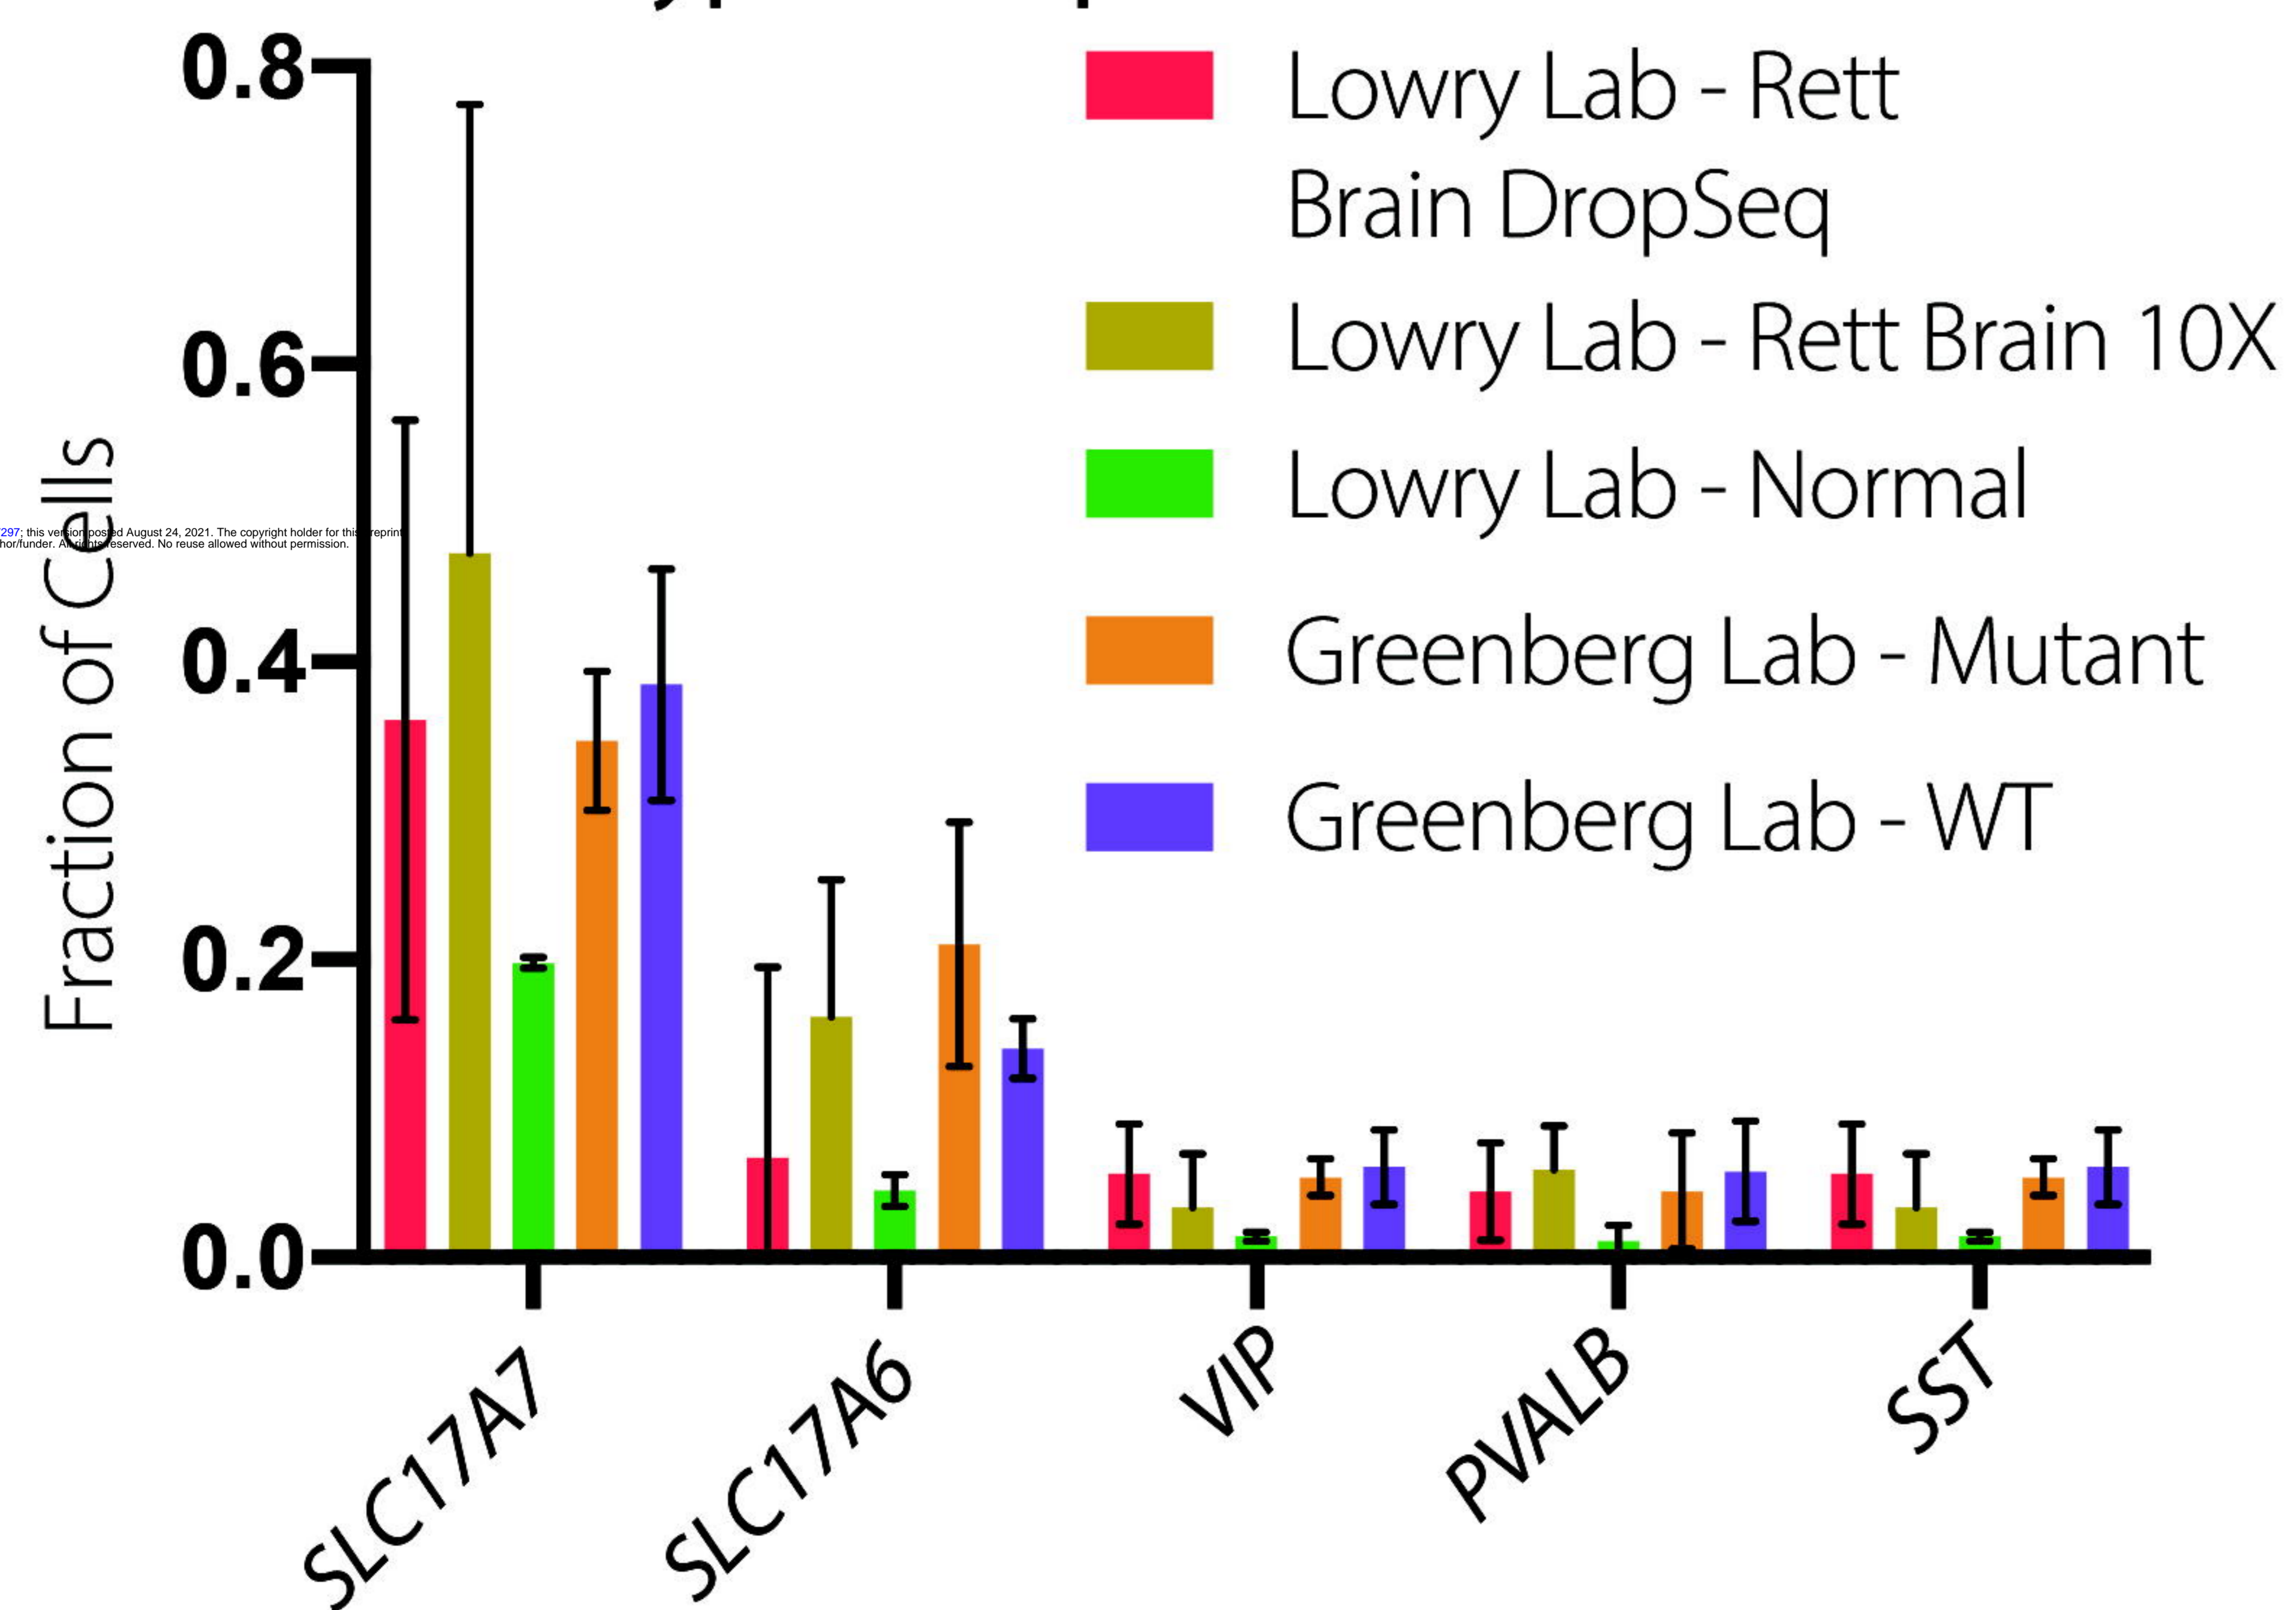

A

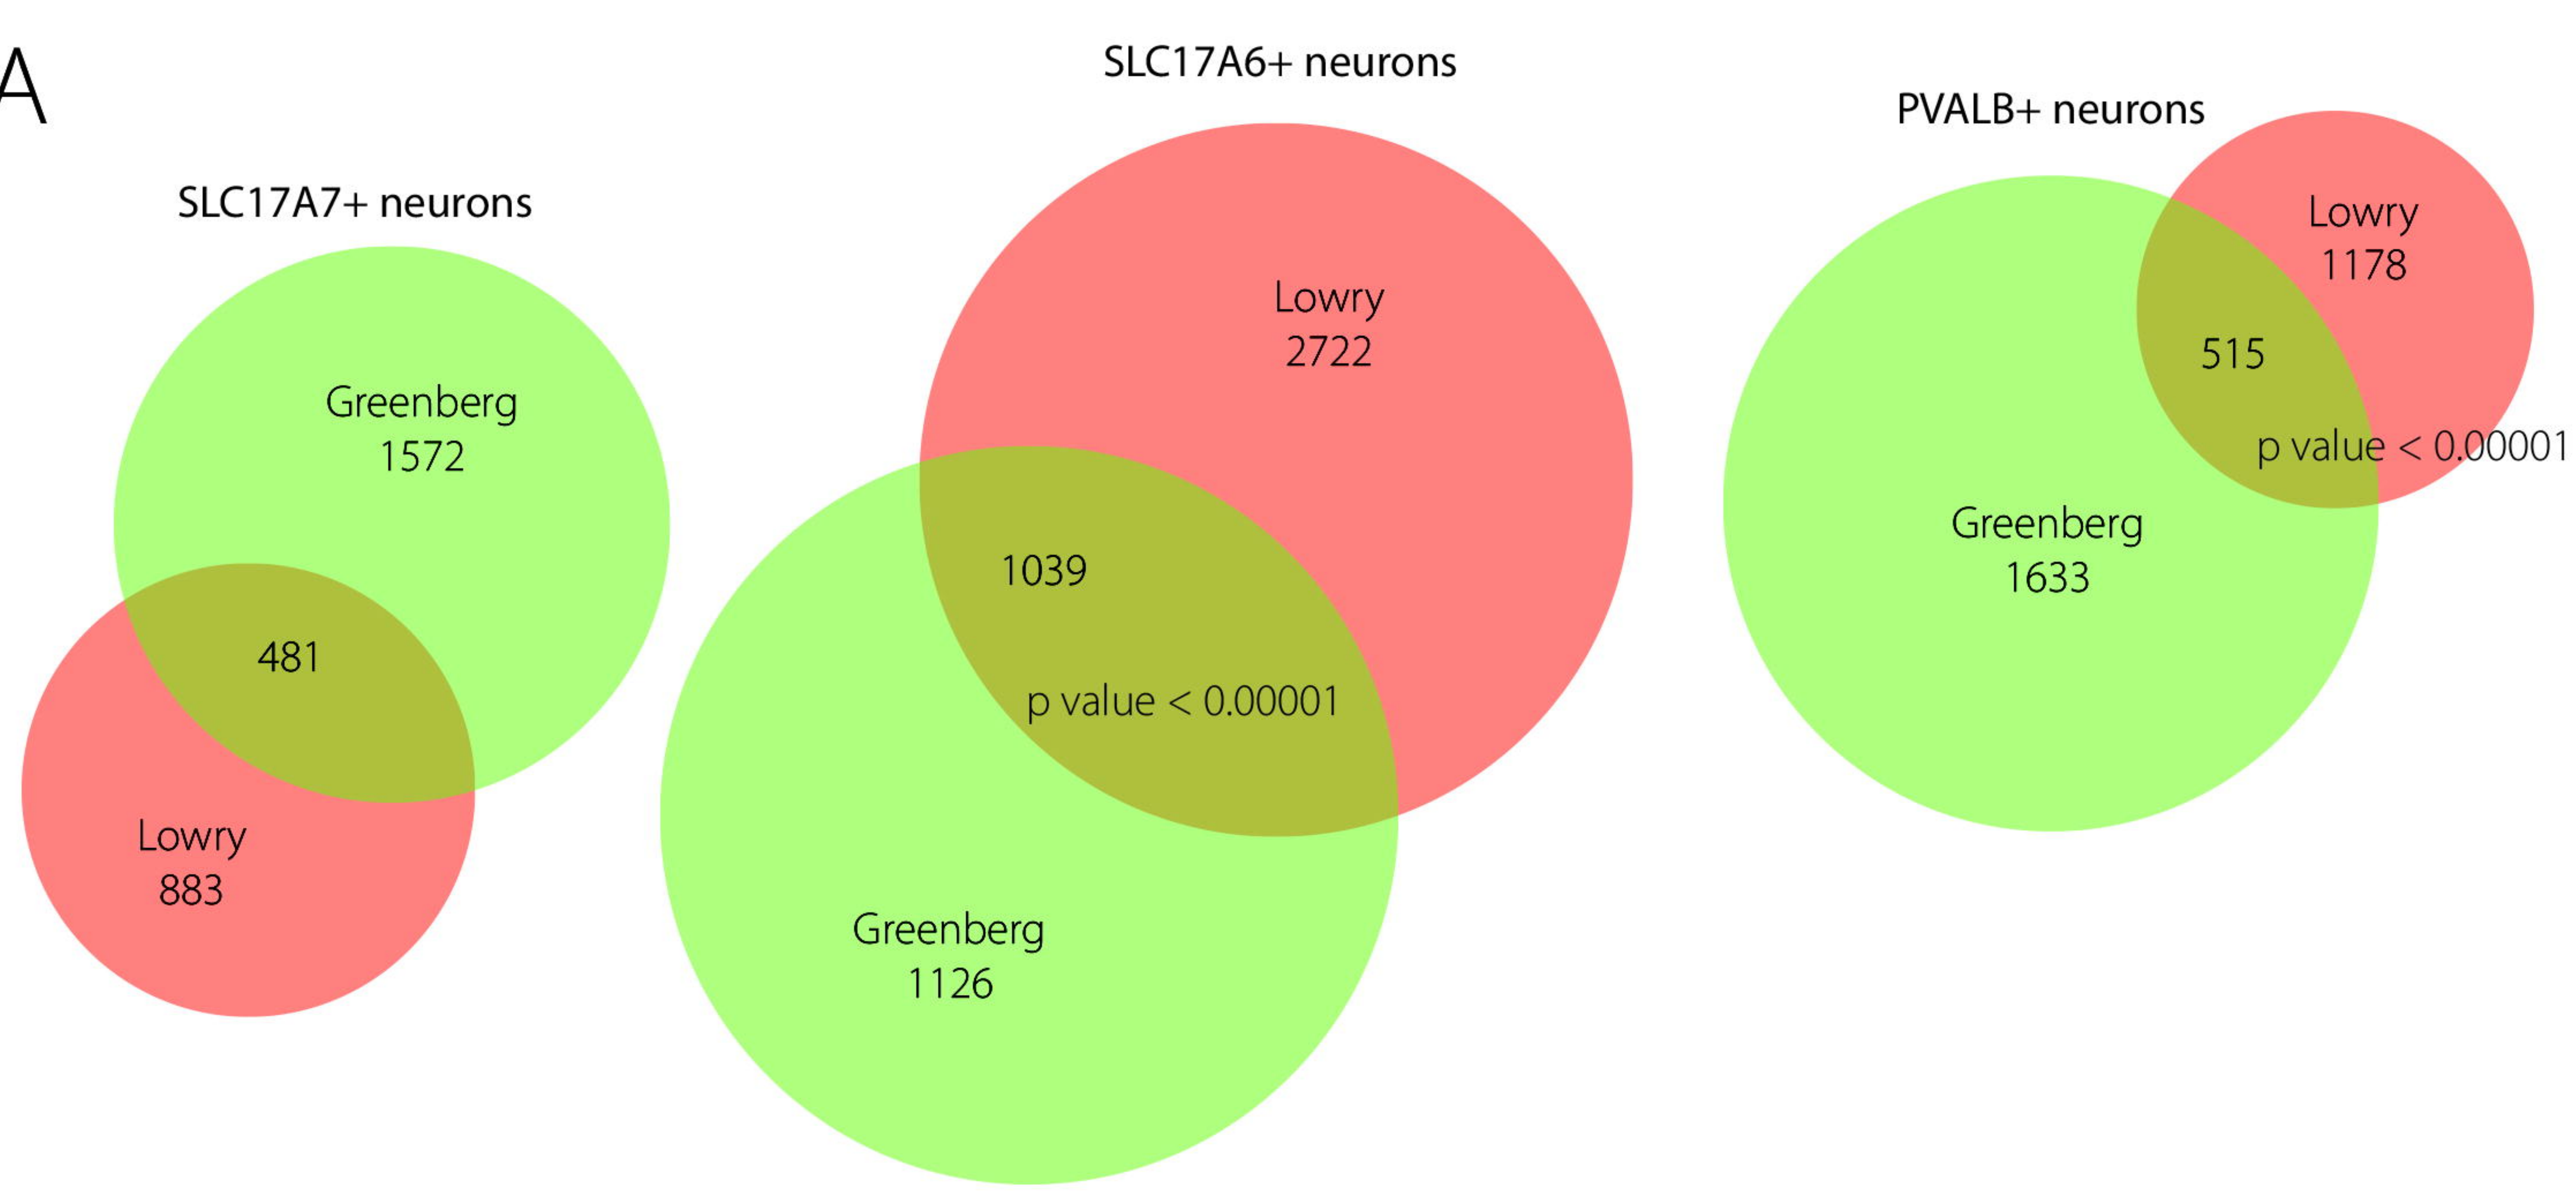

B

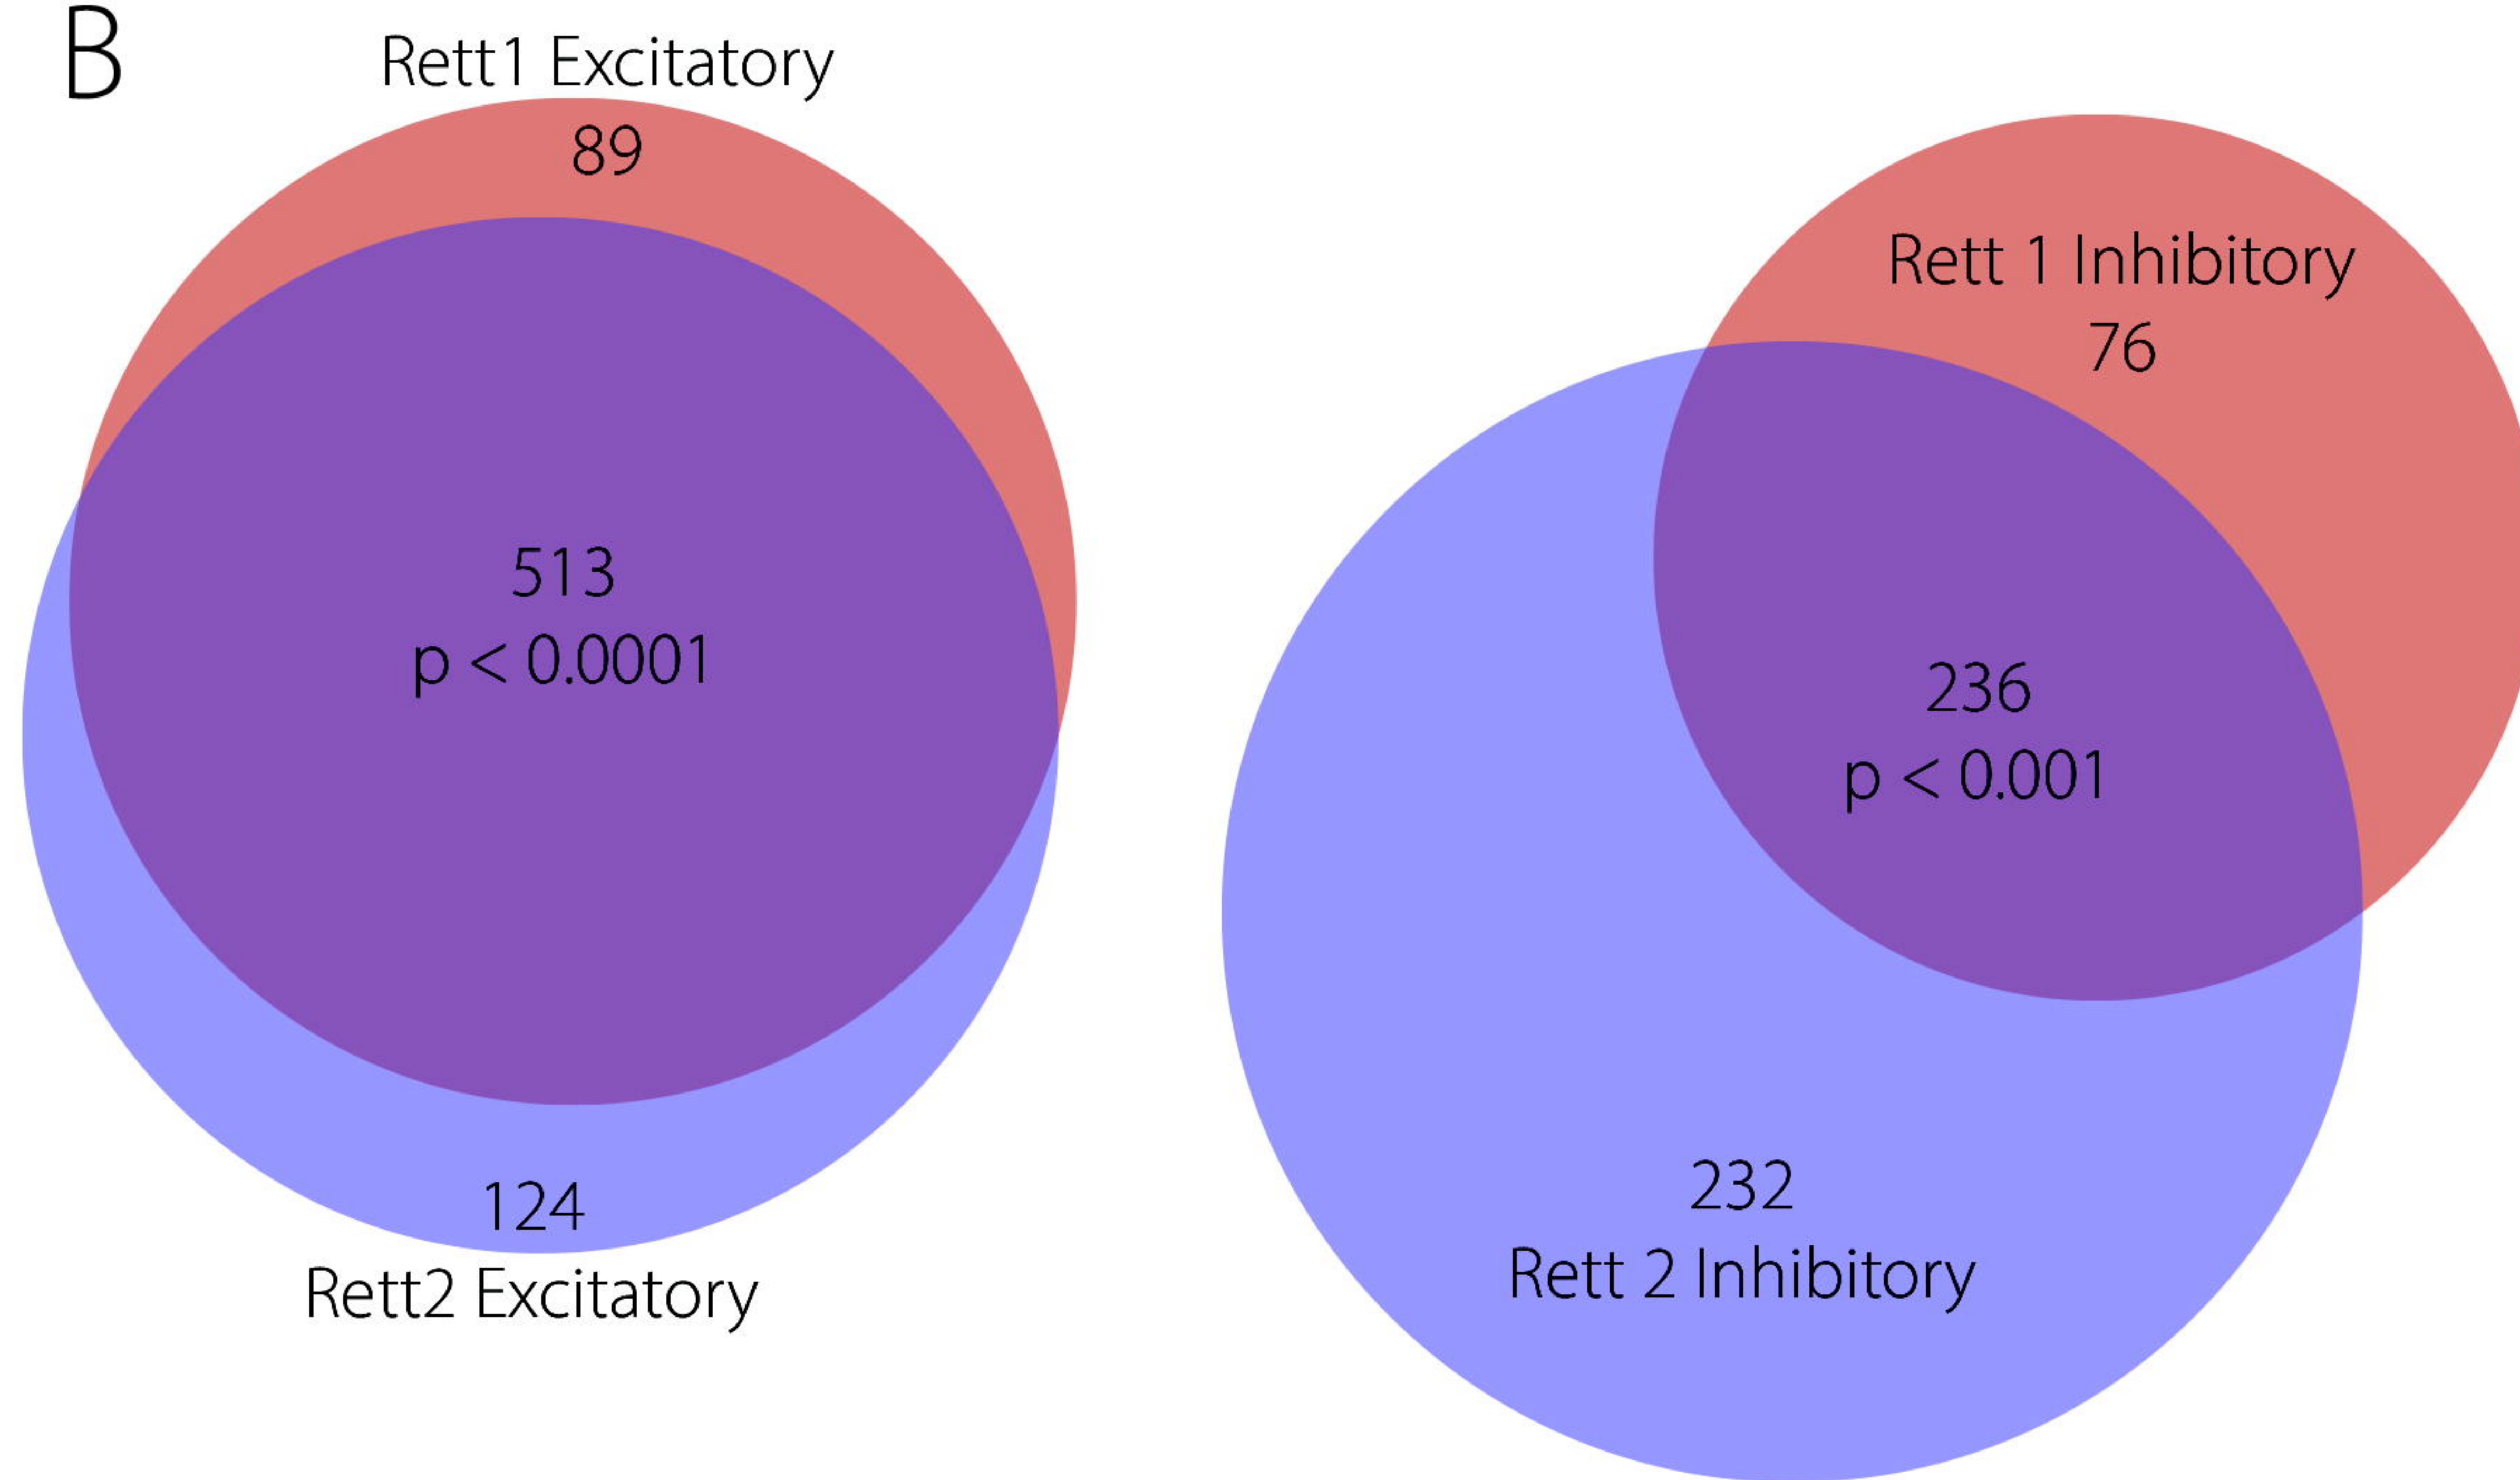

C

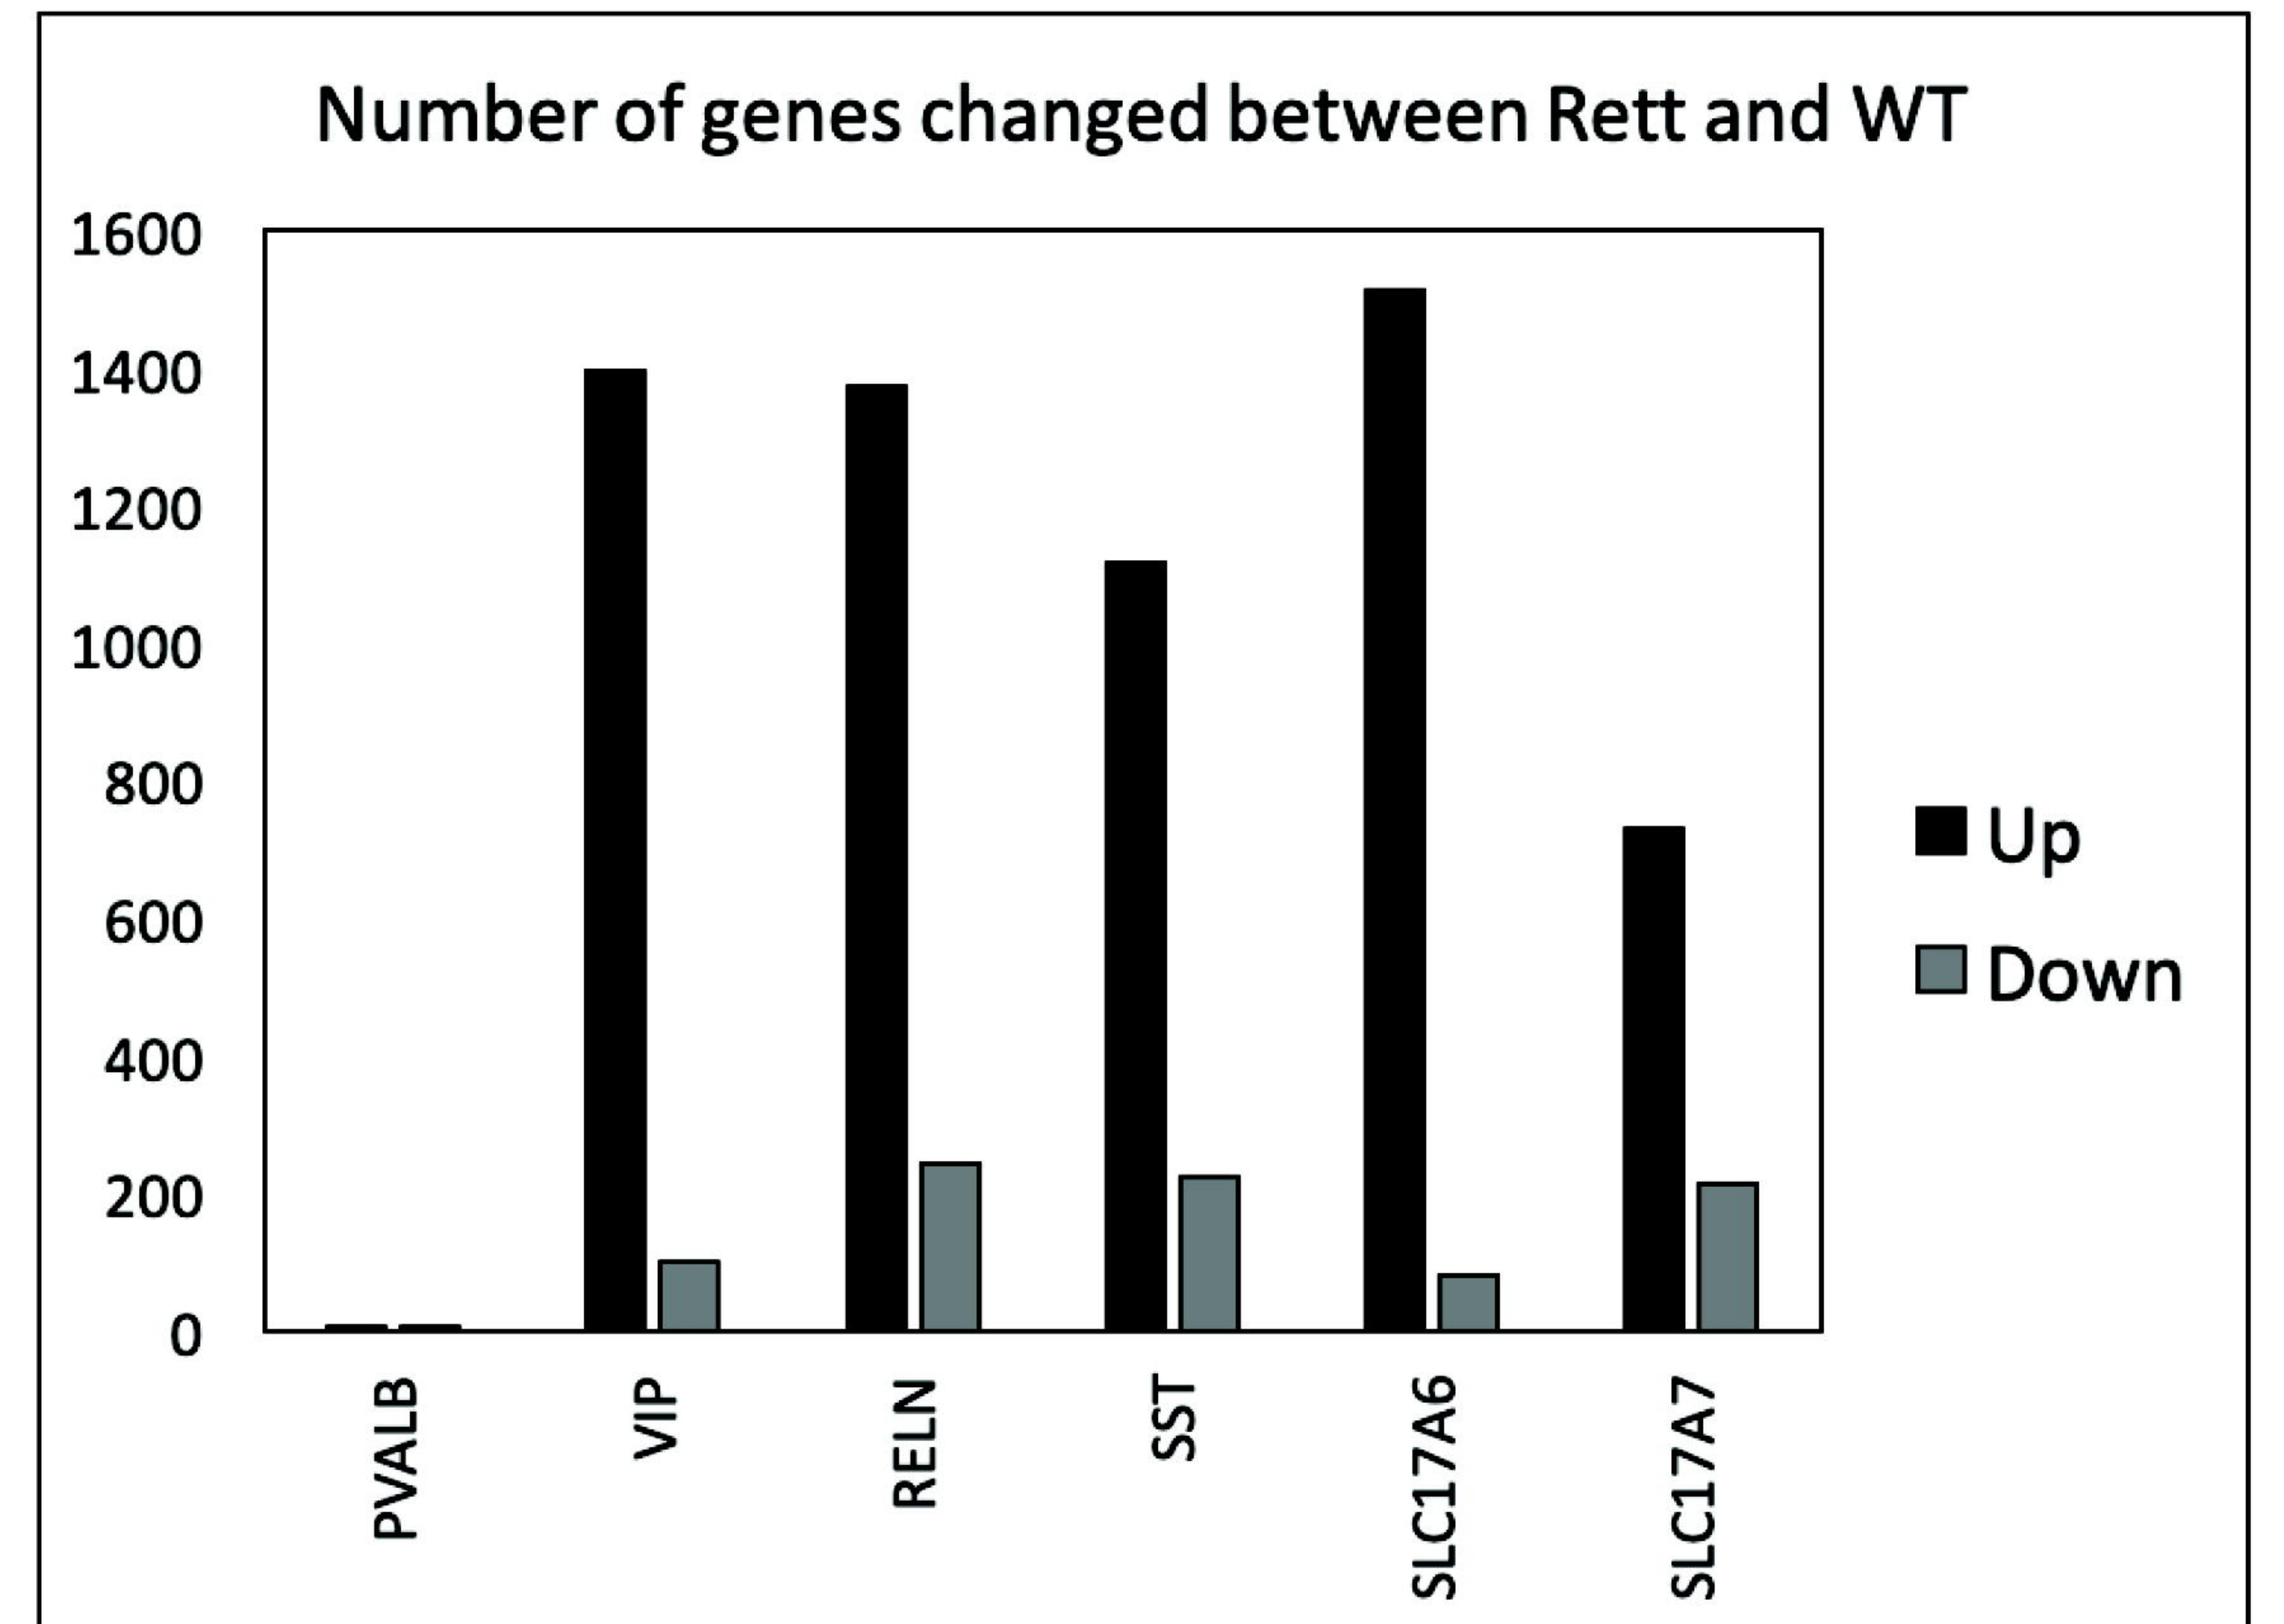

D

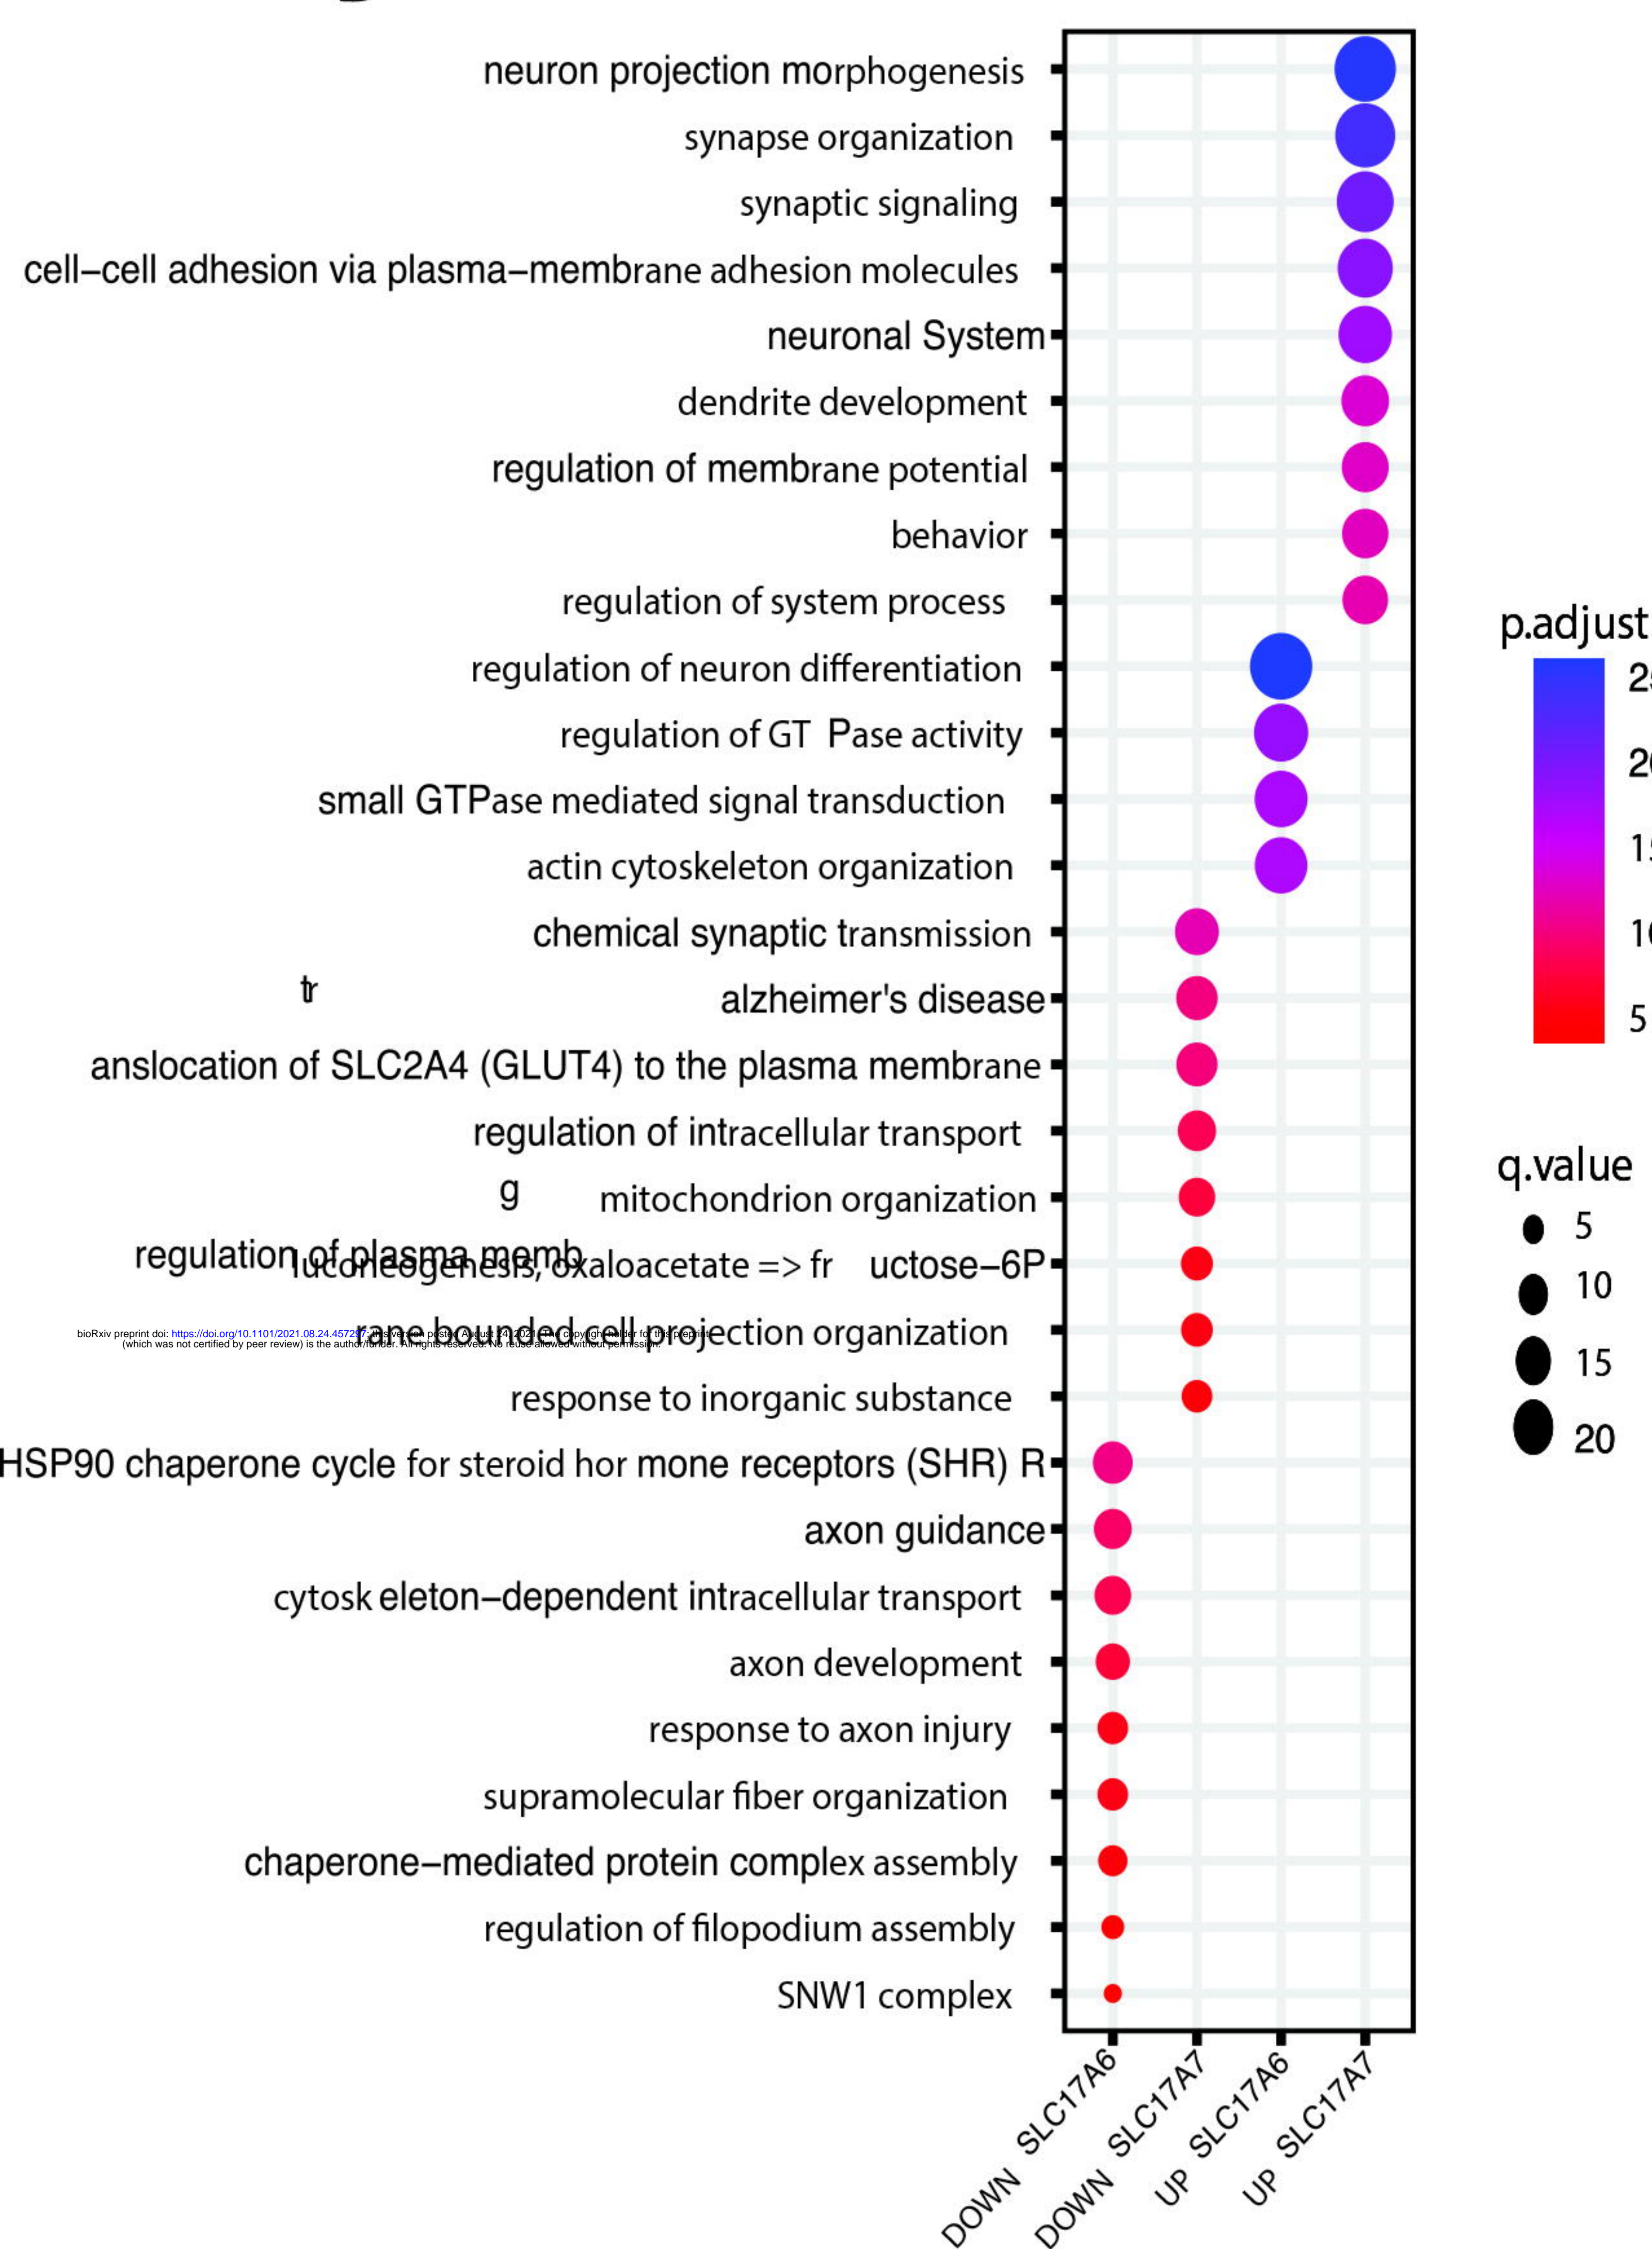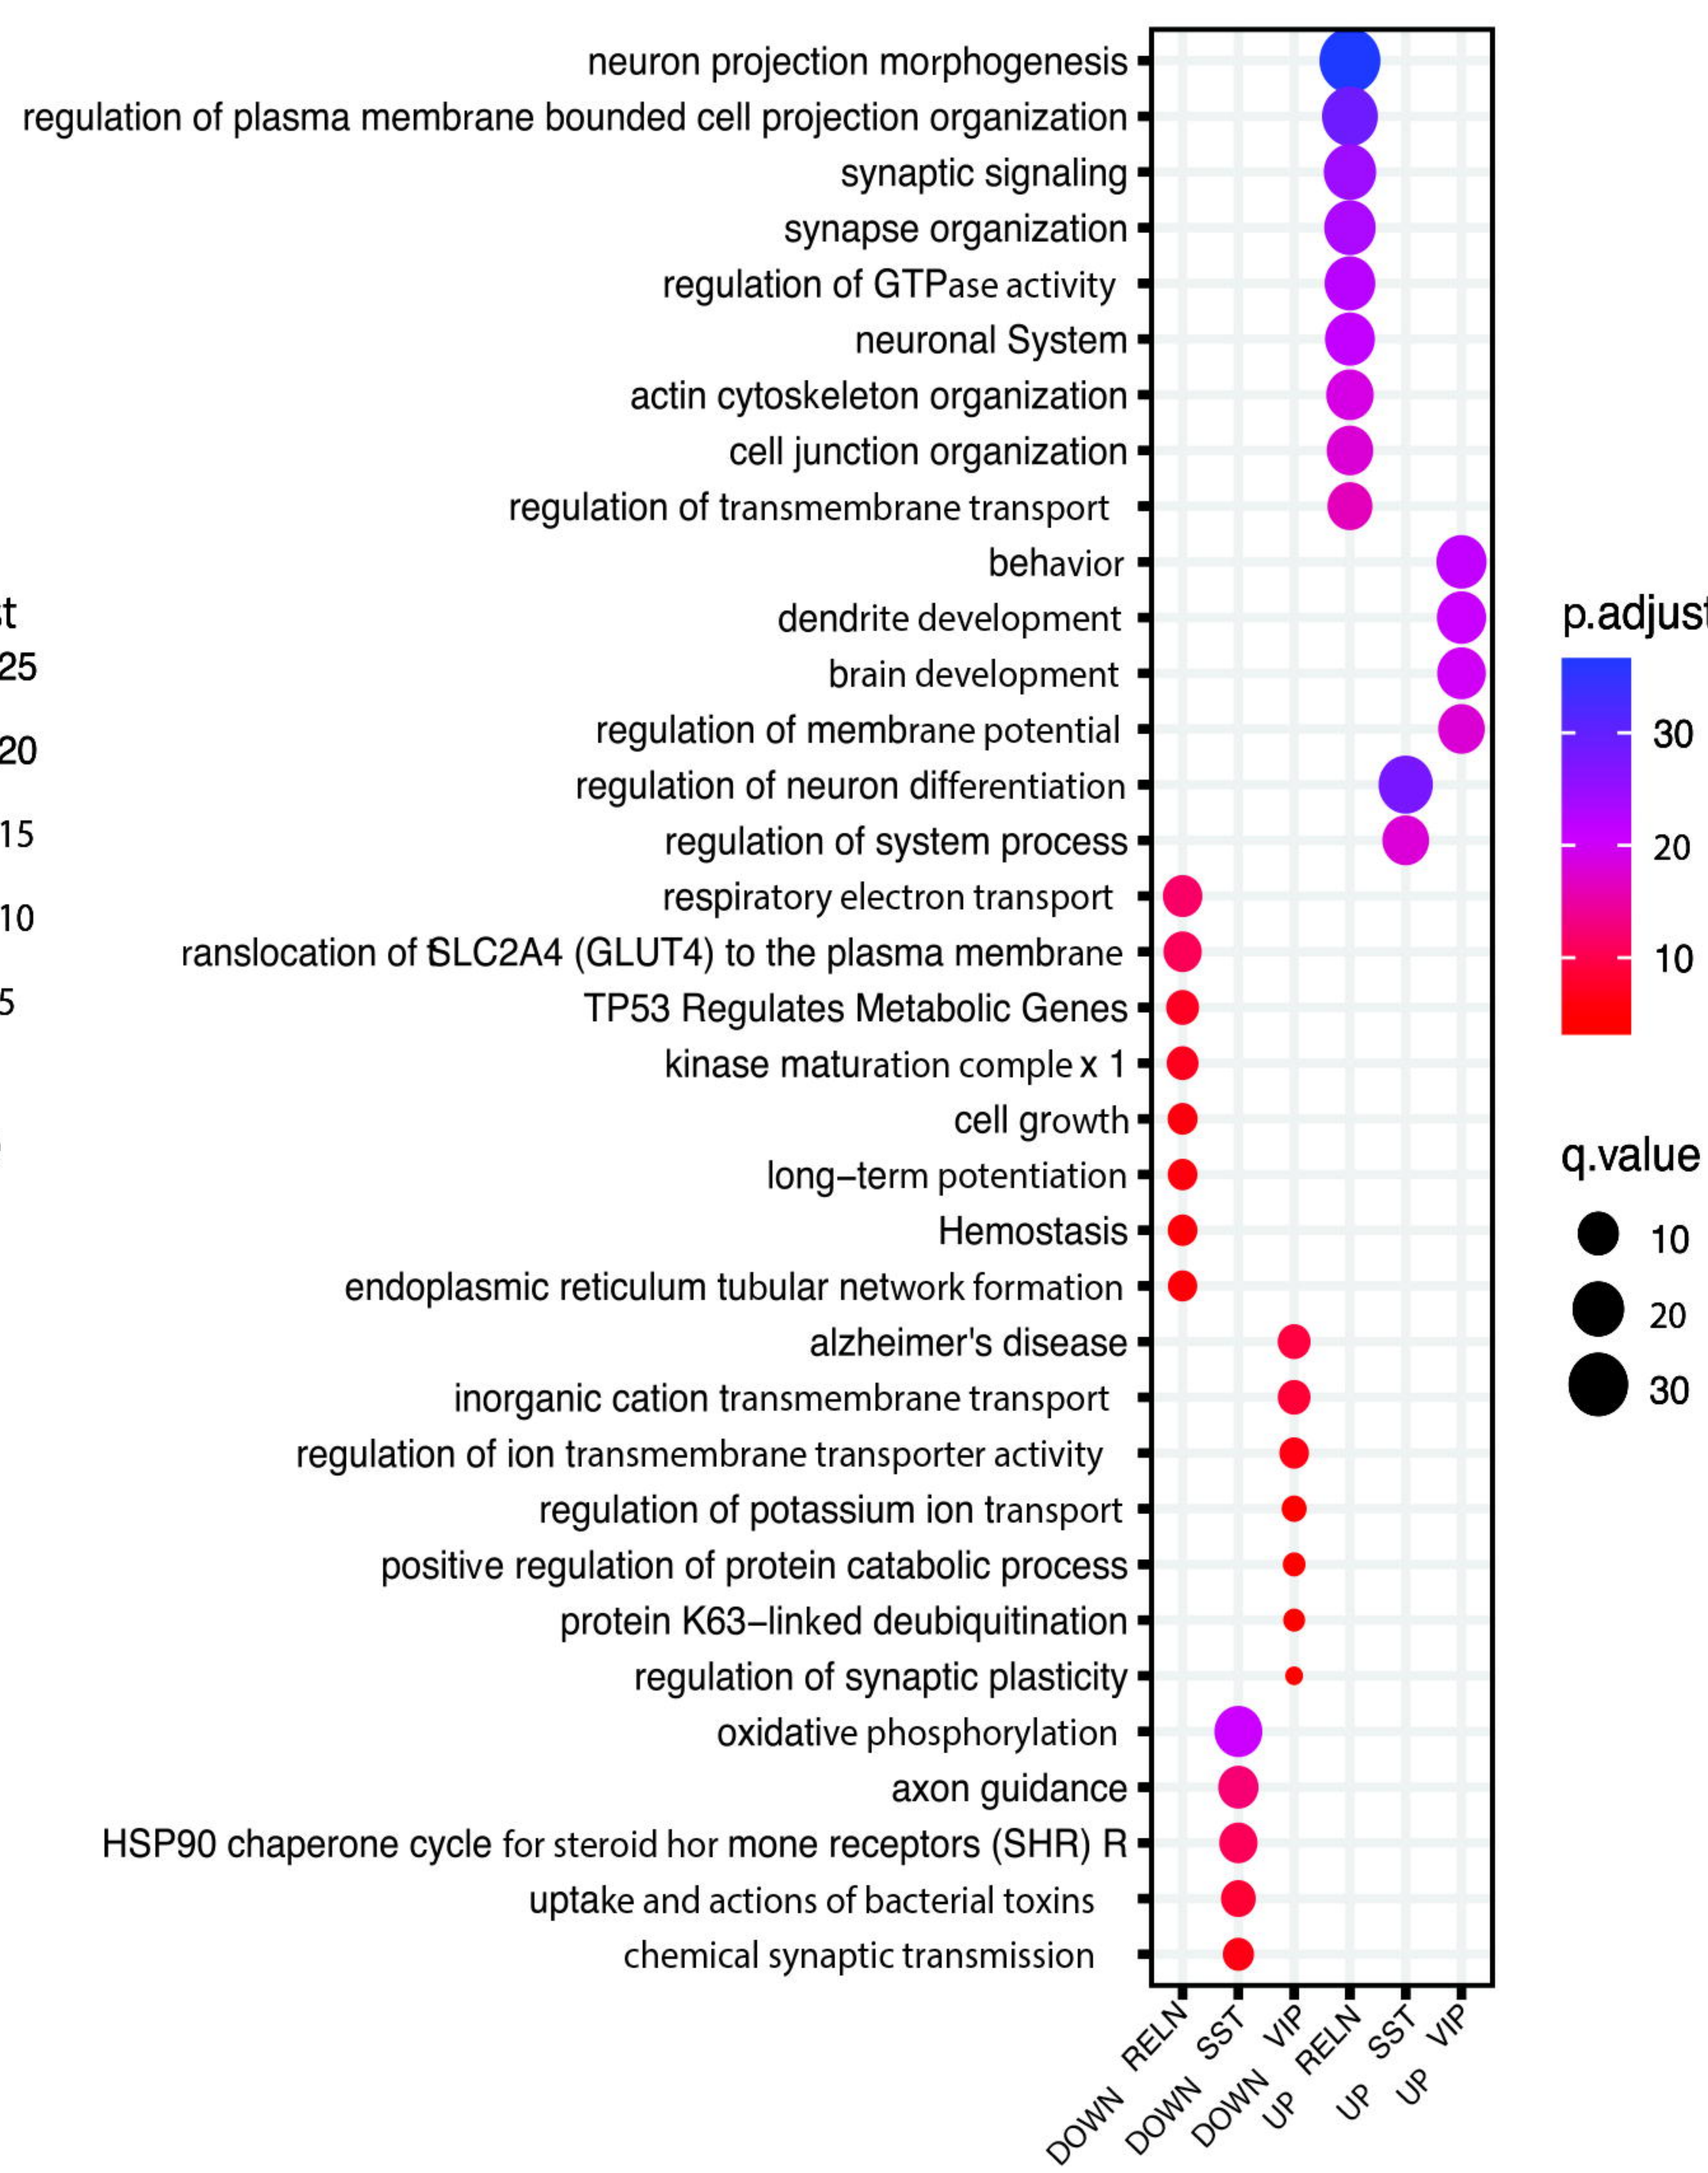

E

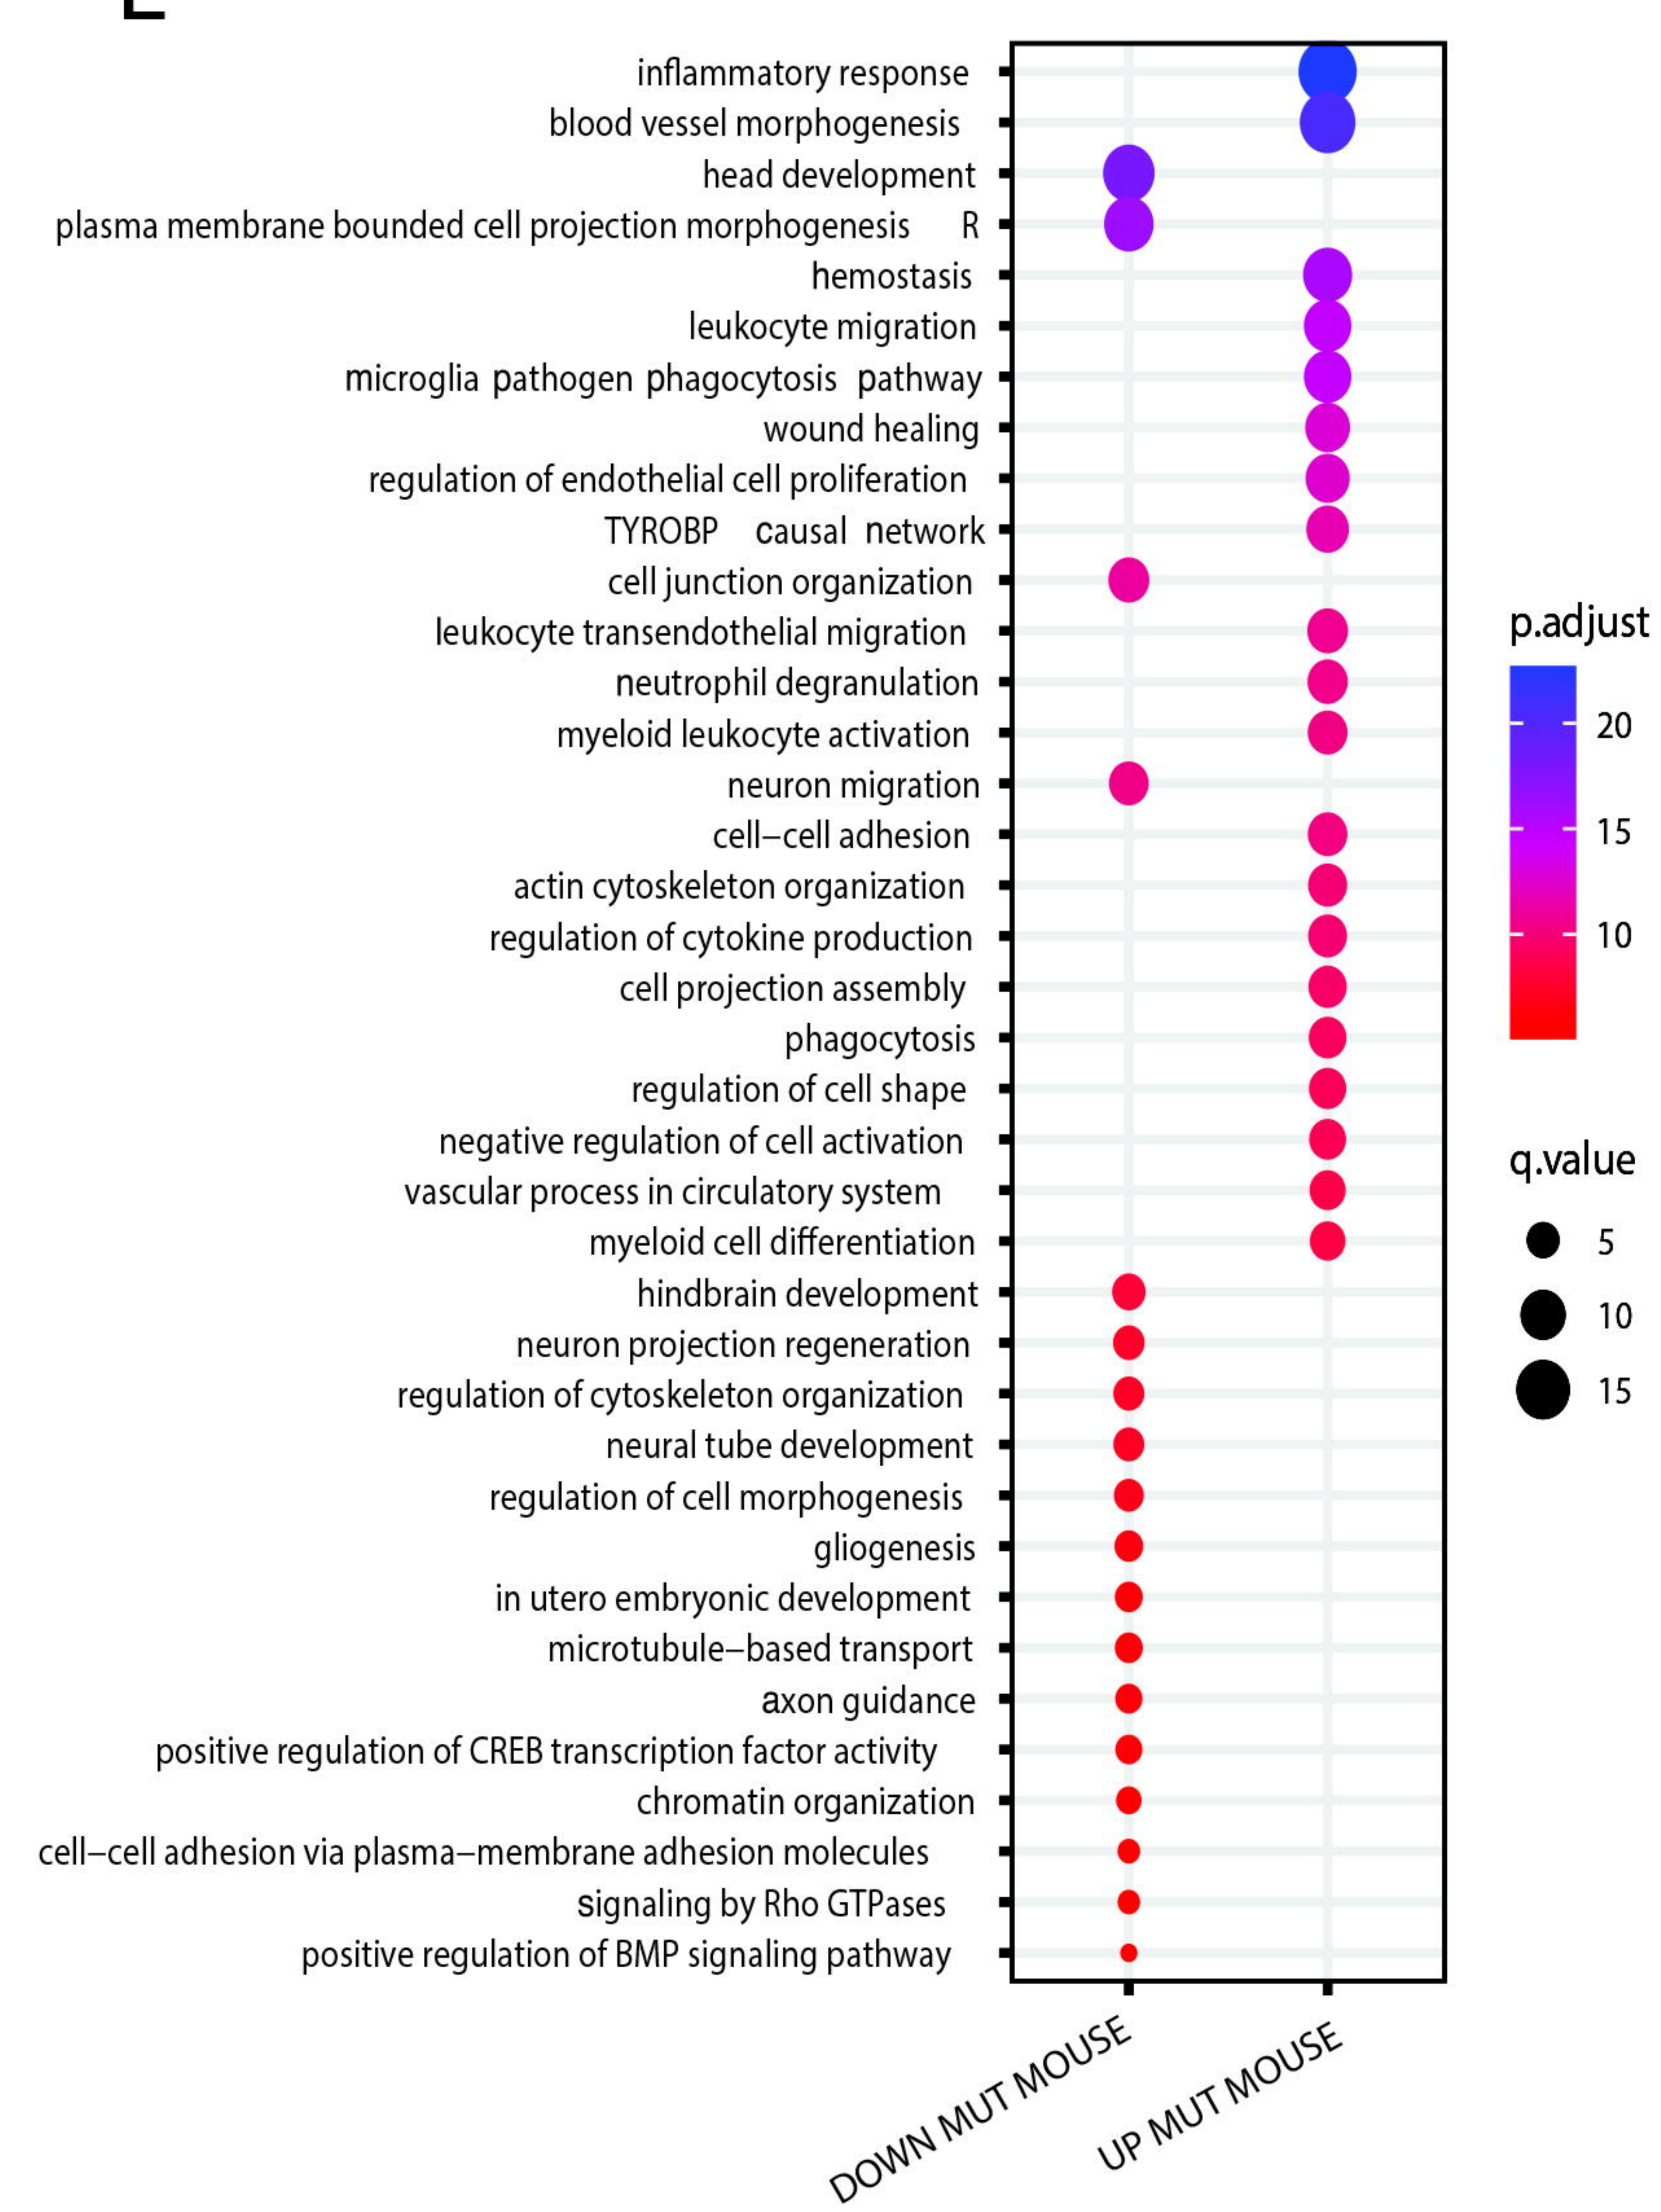

**A** TF with enriched binding sites in upregulated DEGs in MECP2- neurons

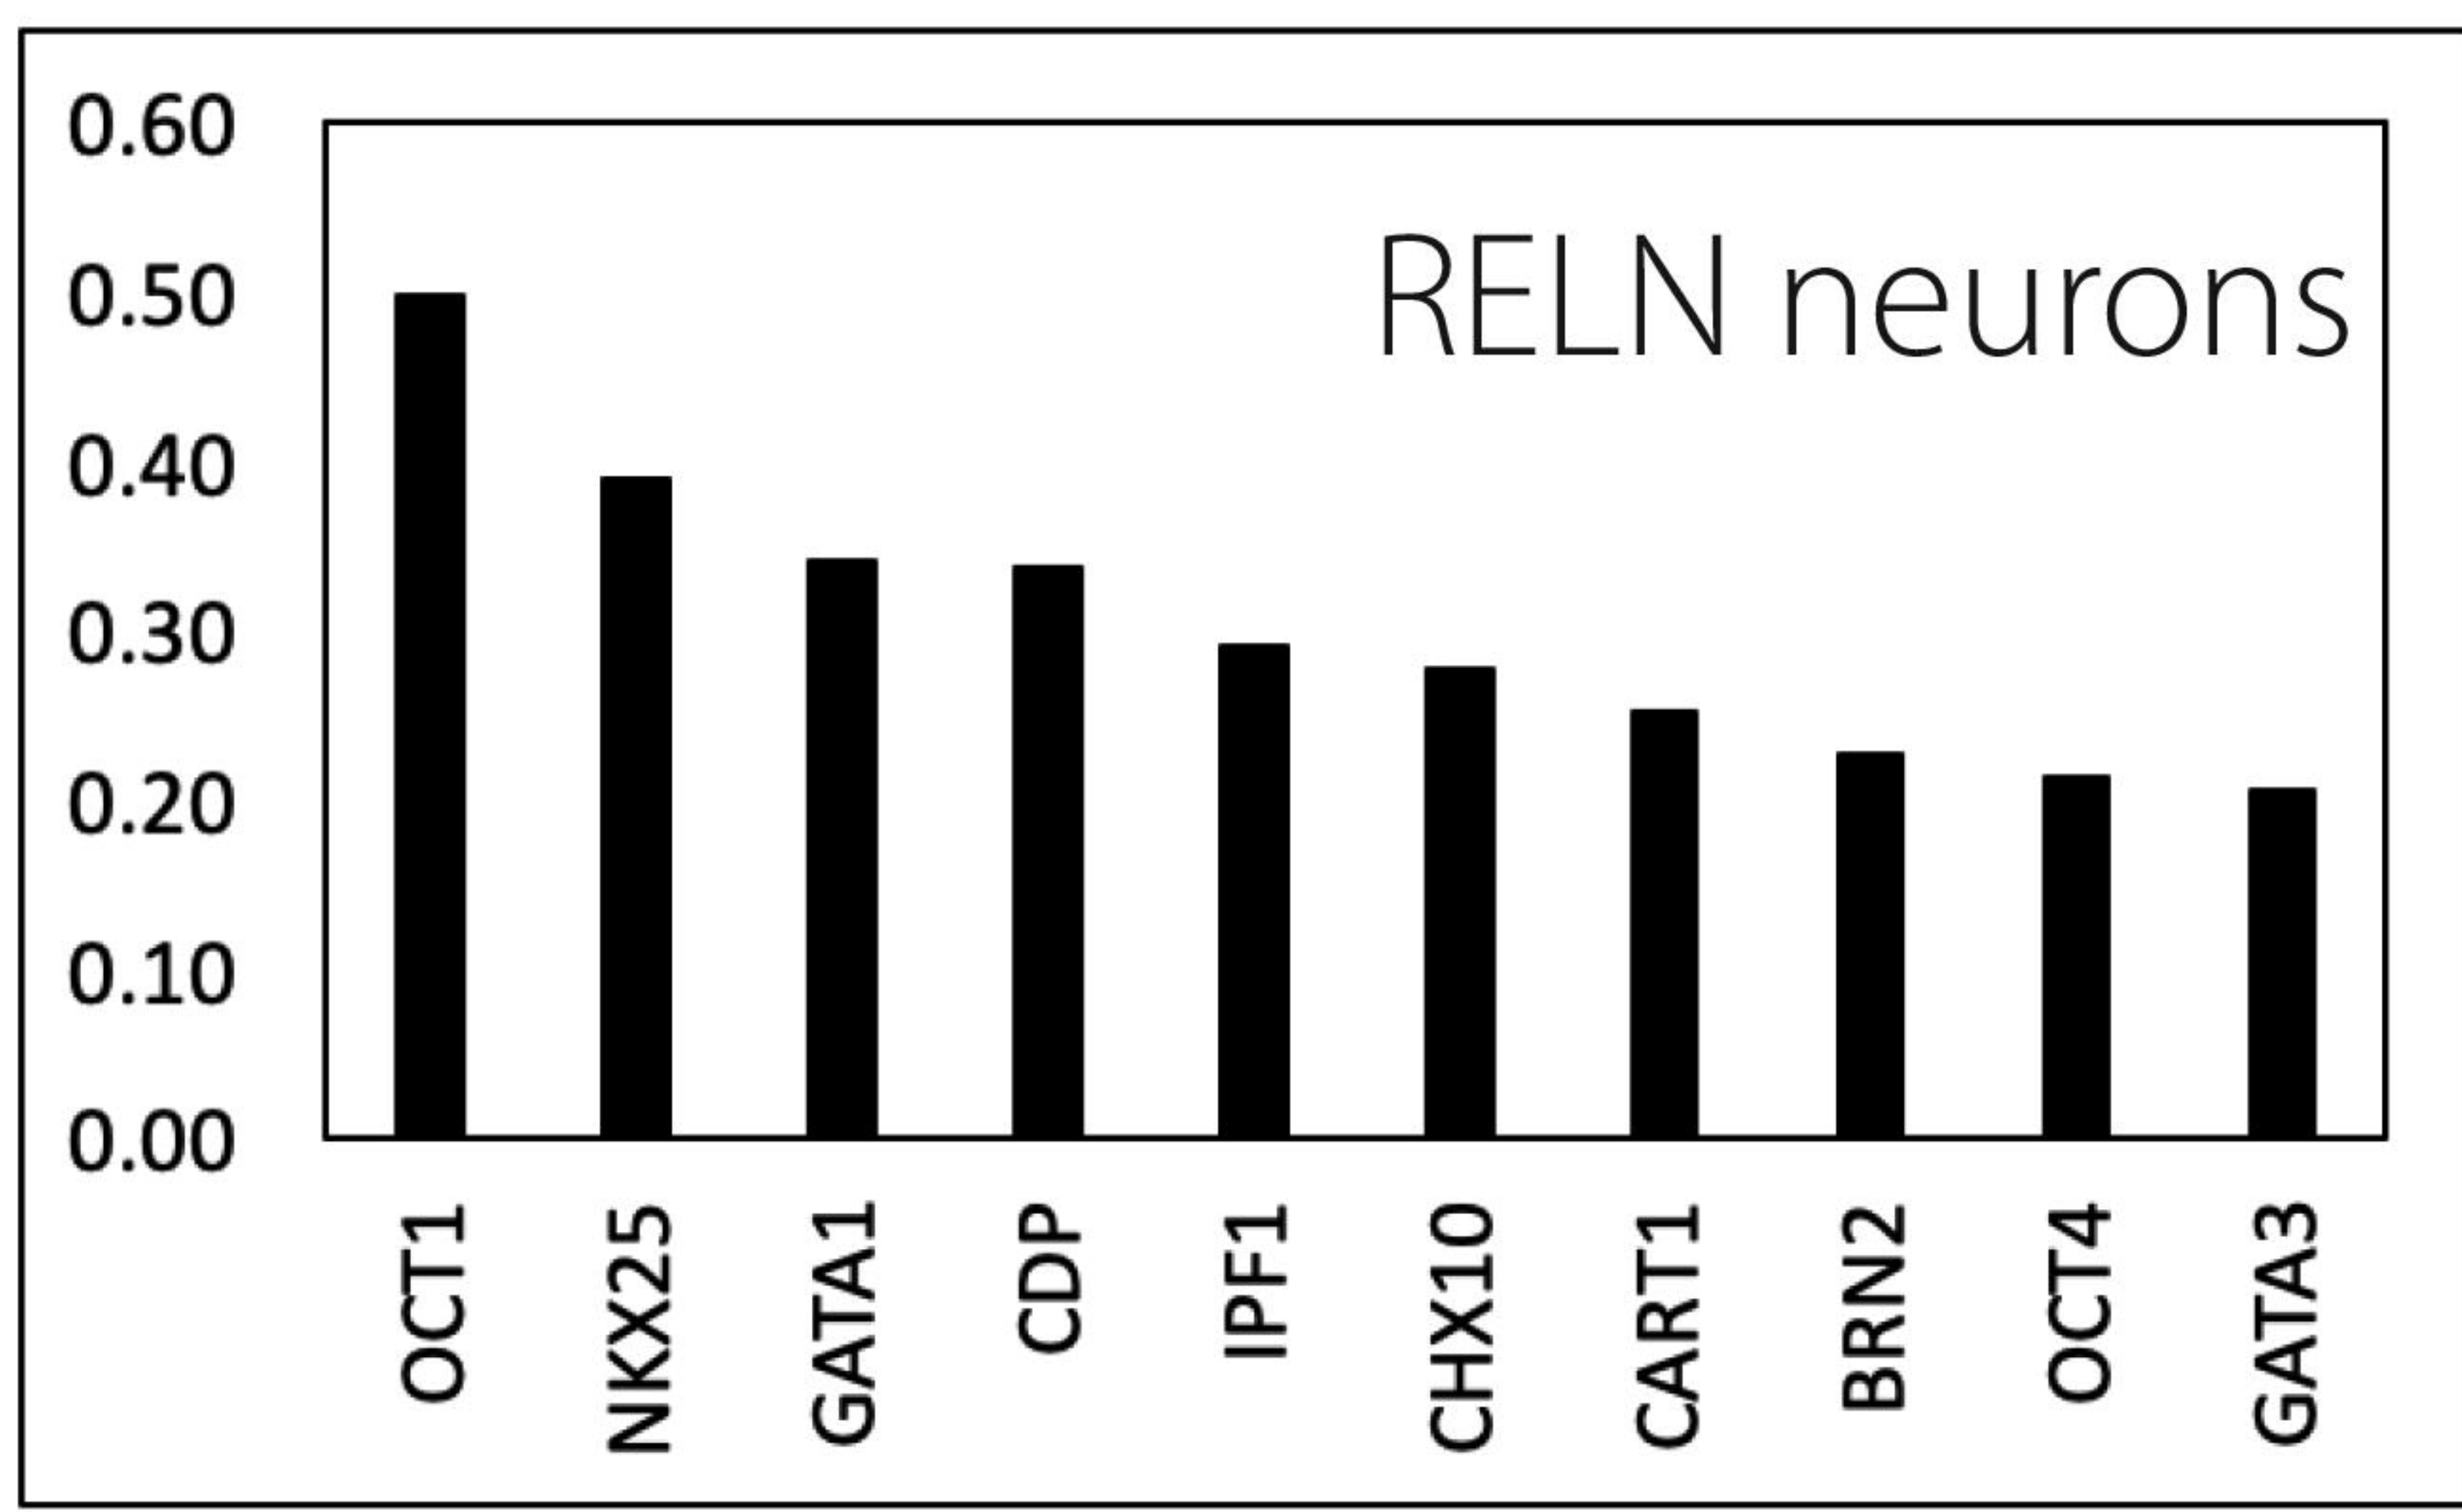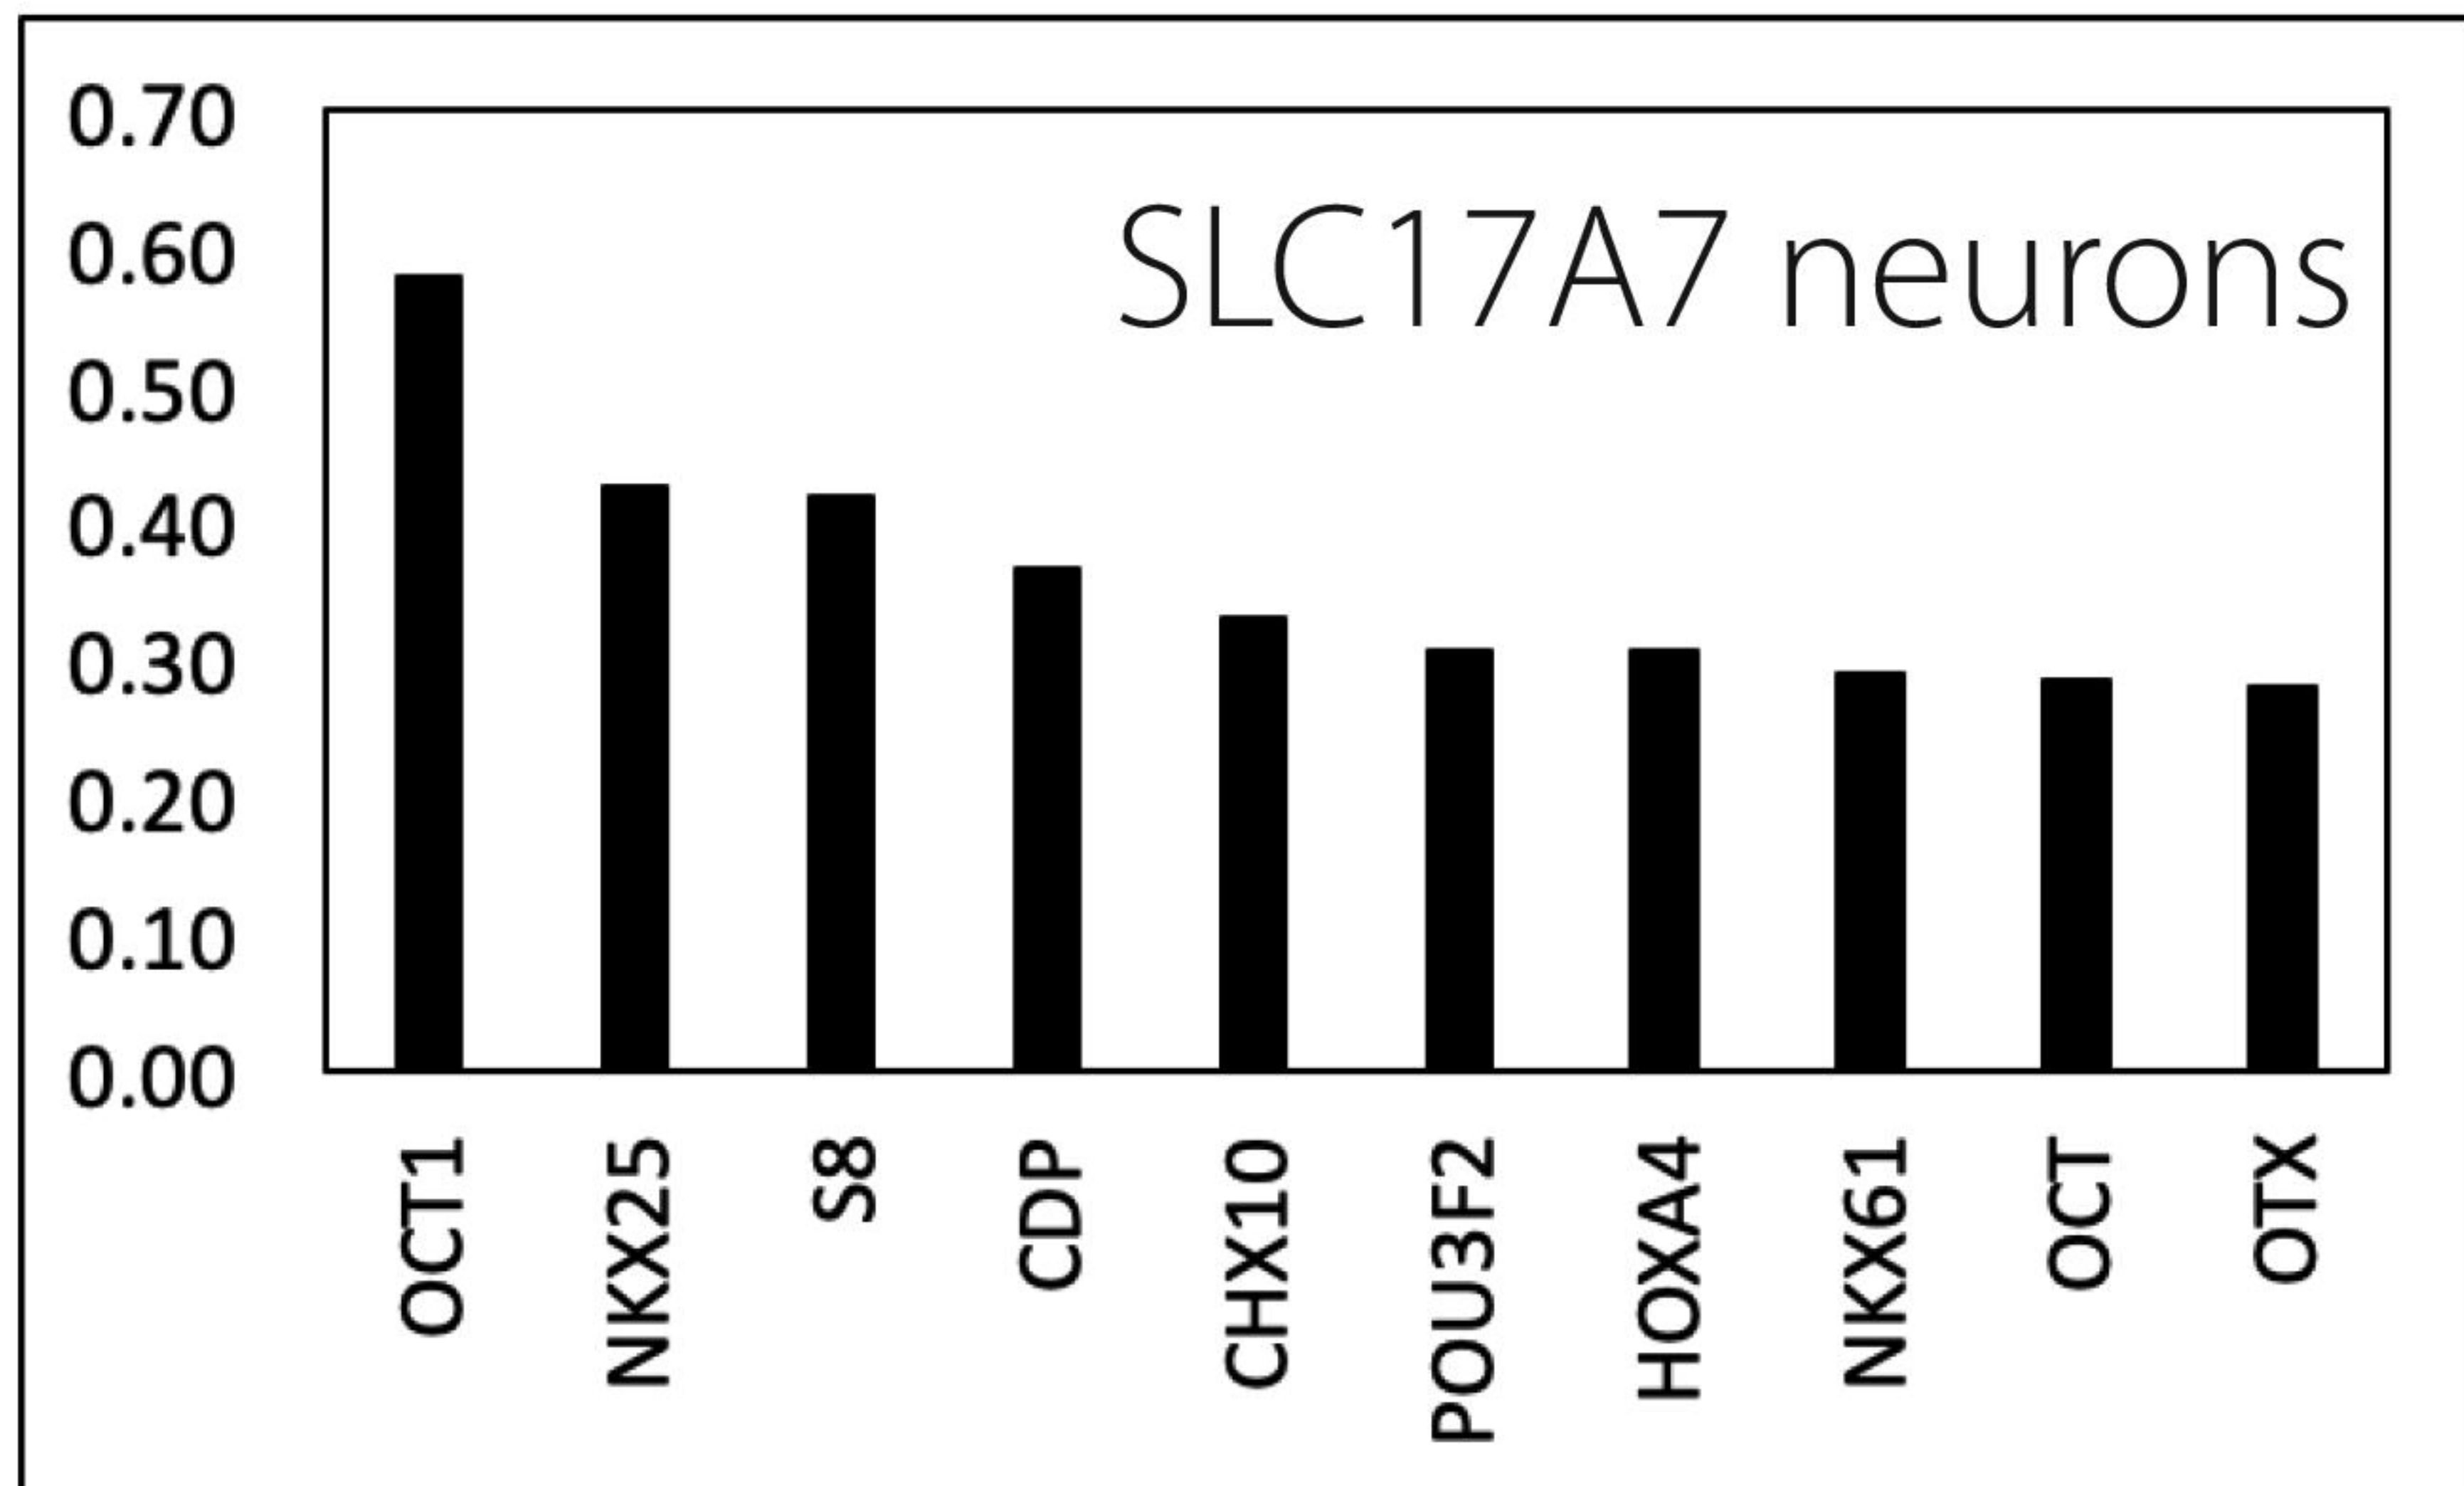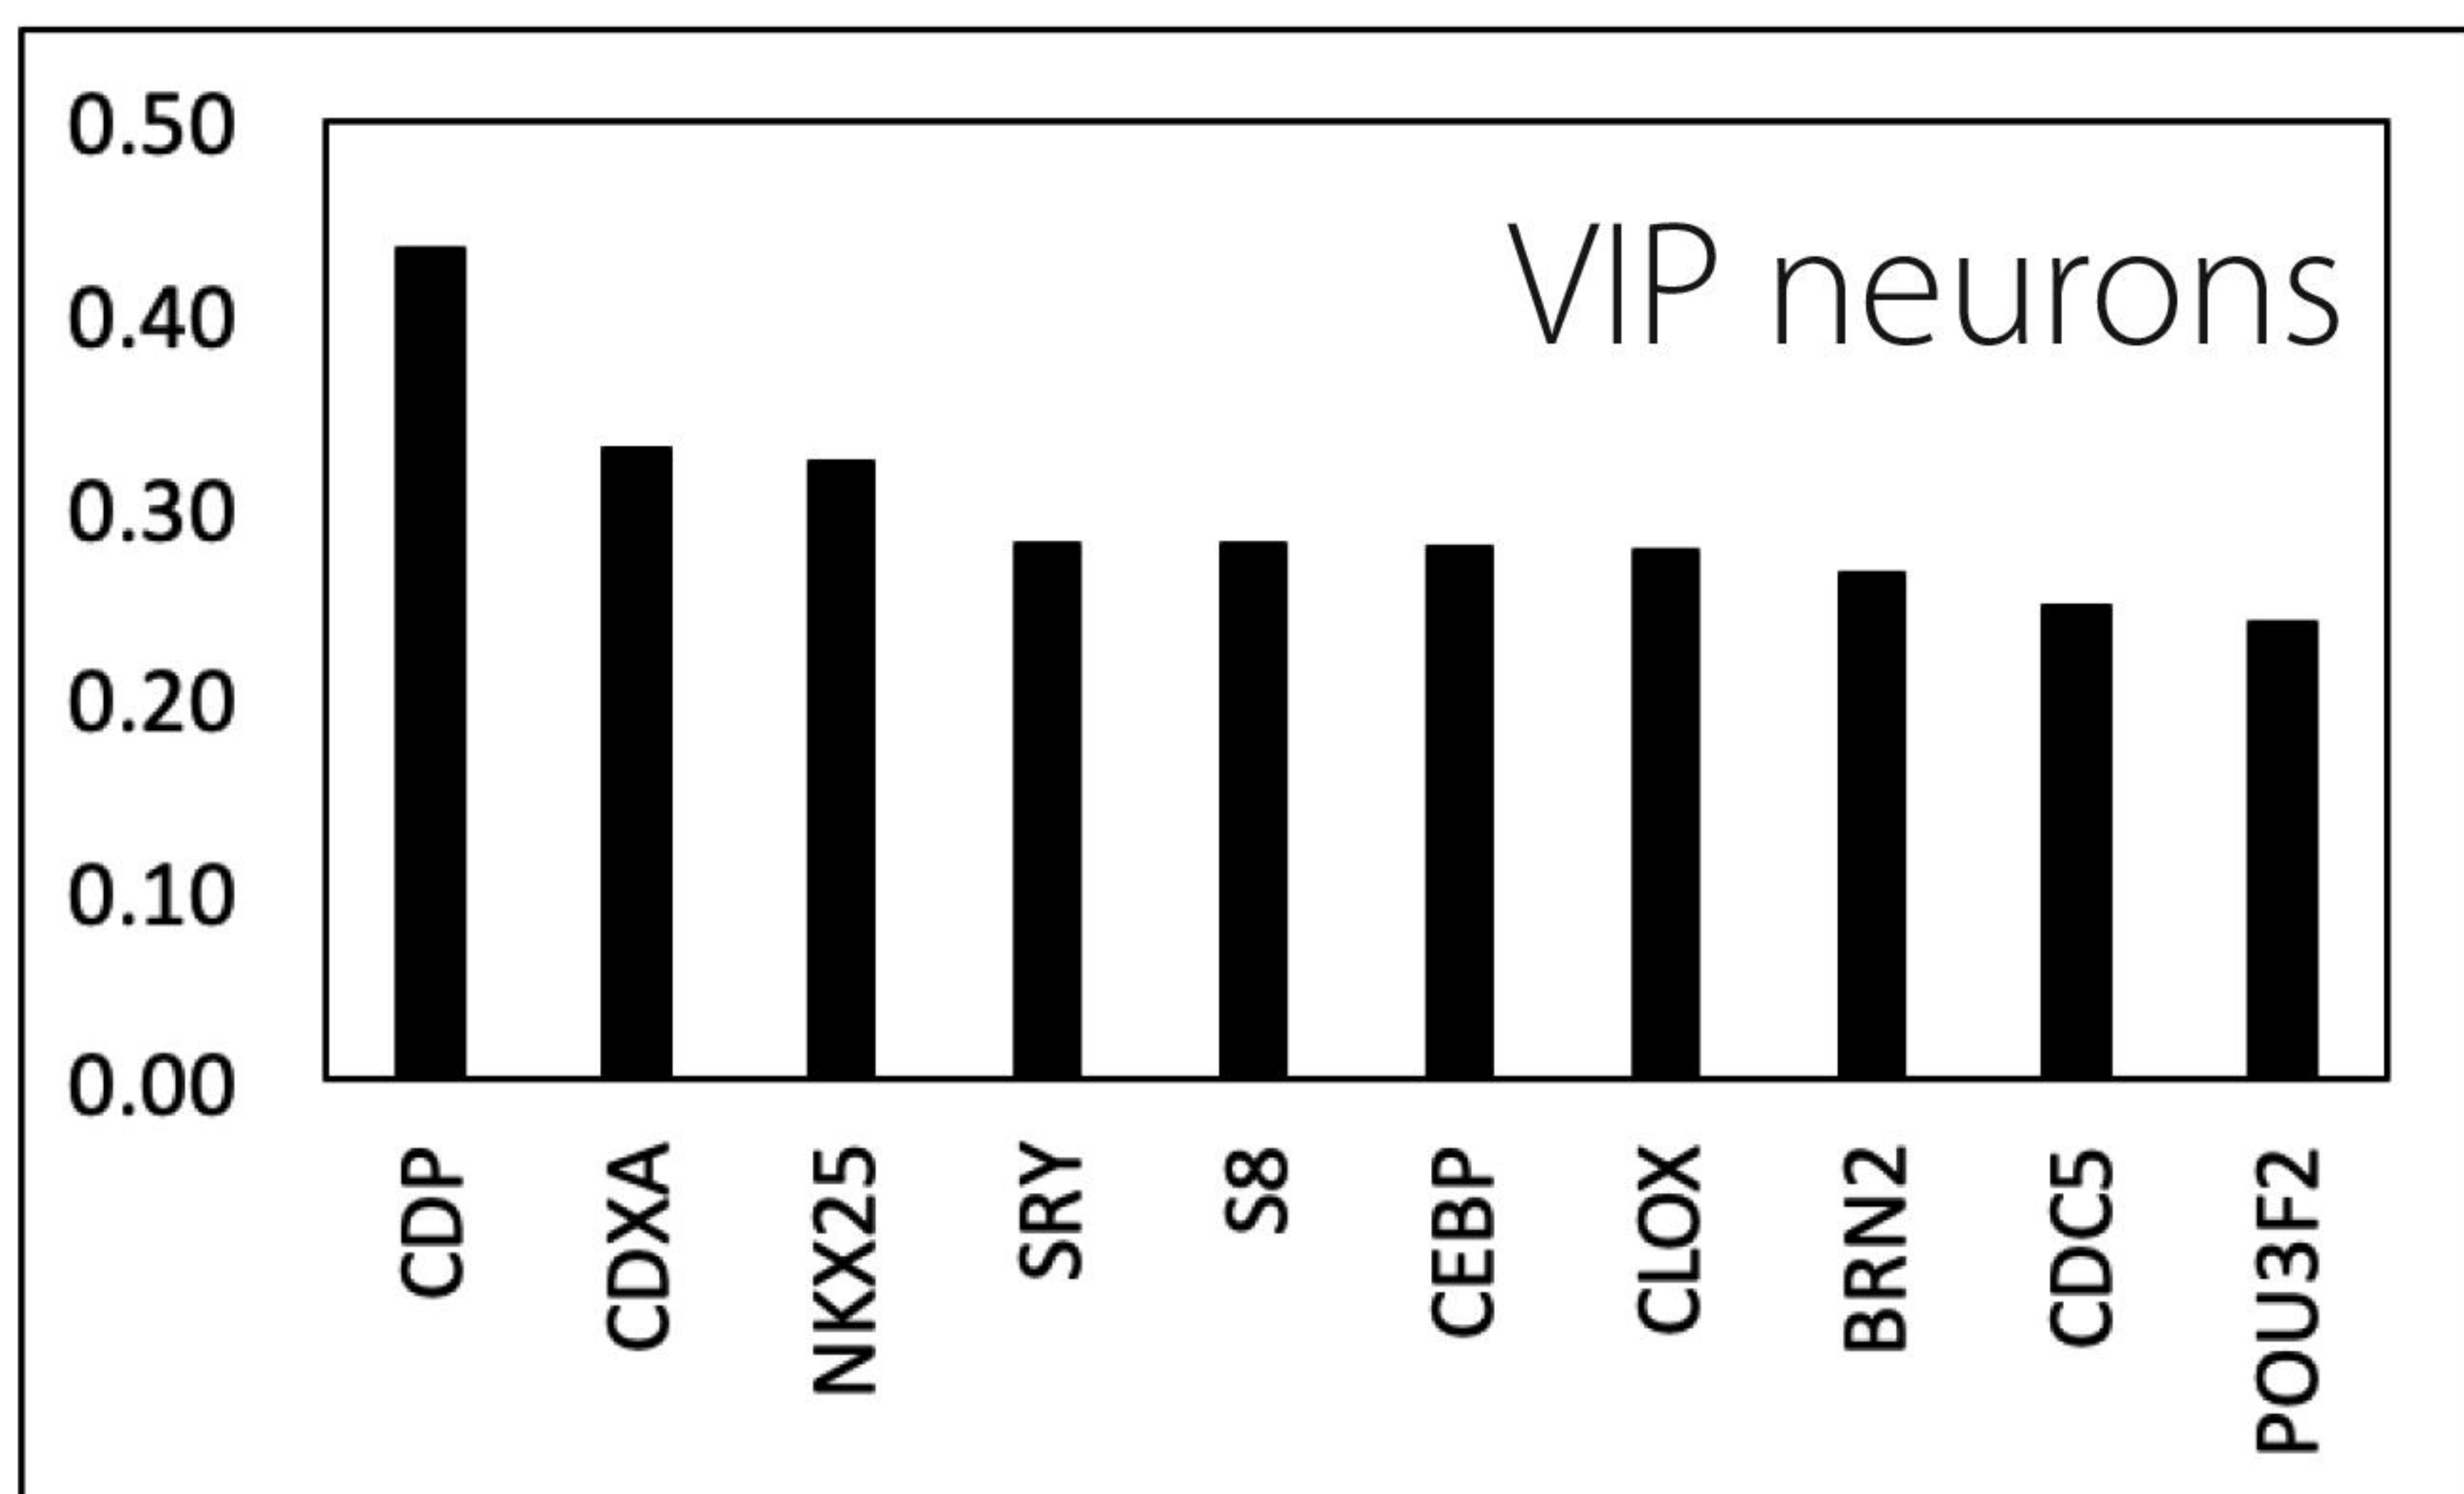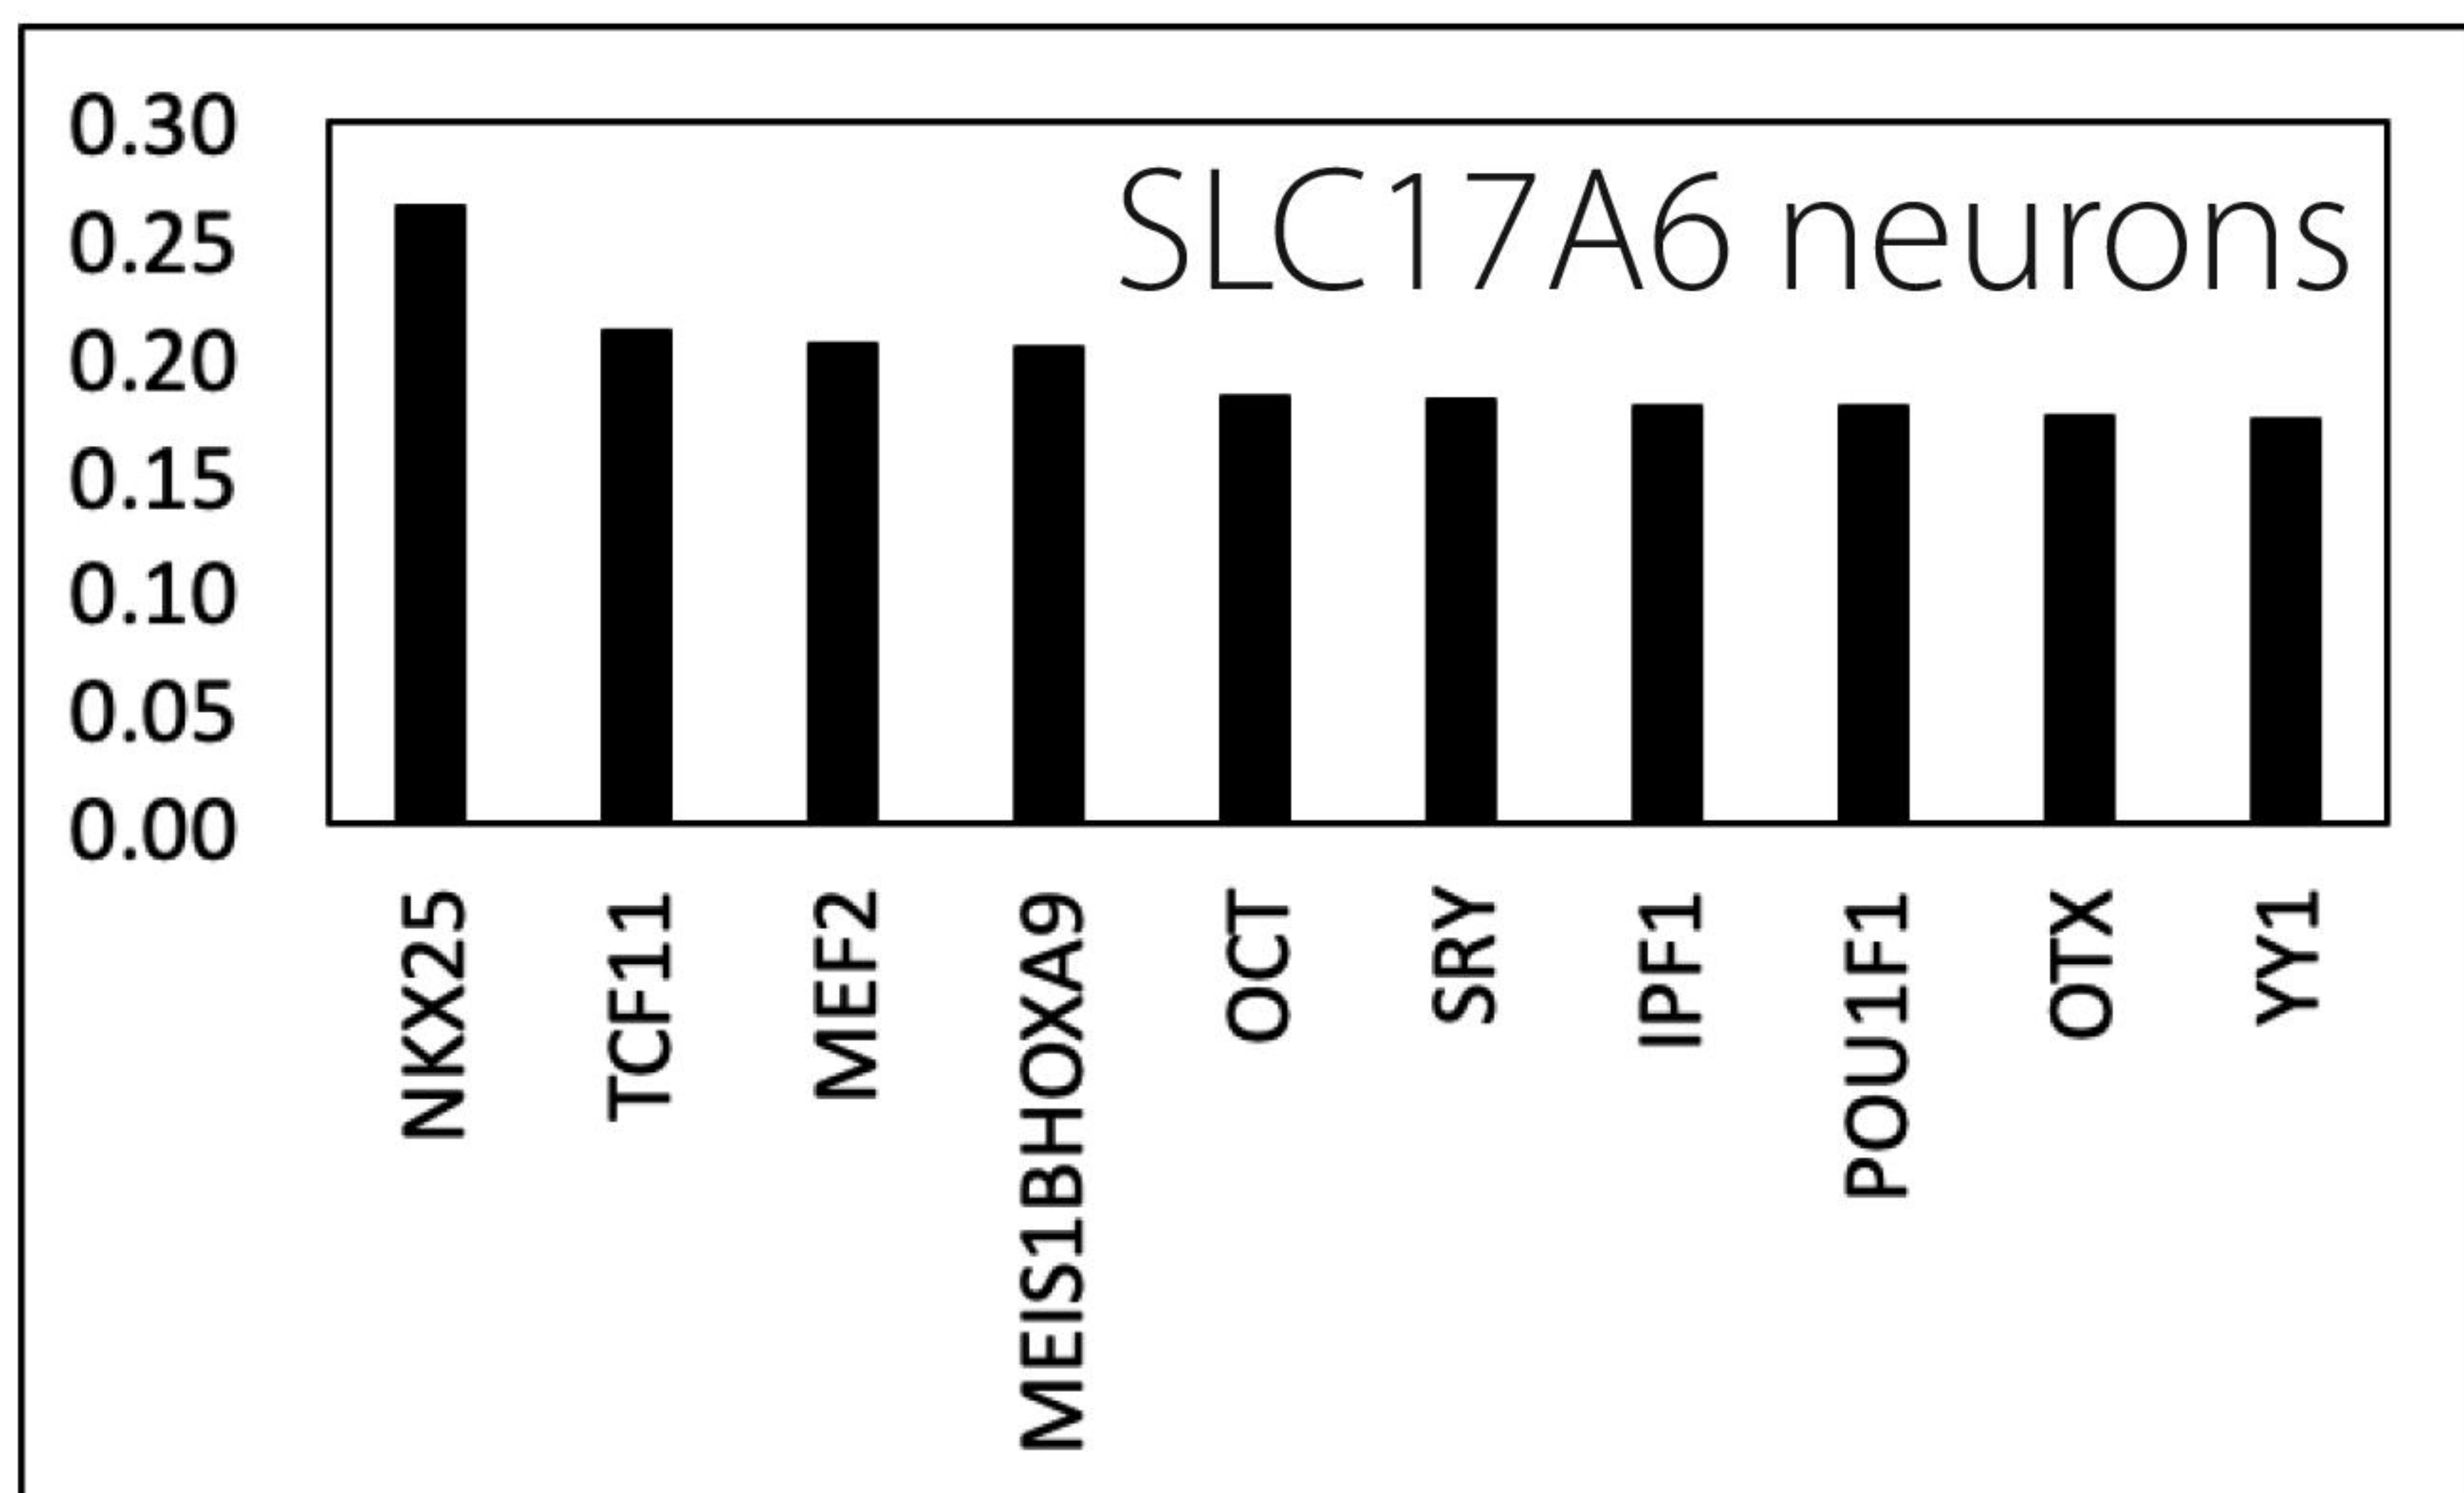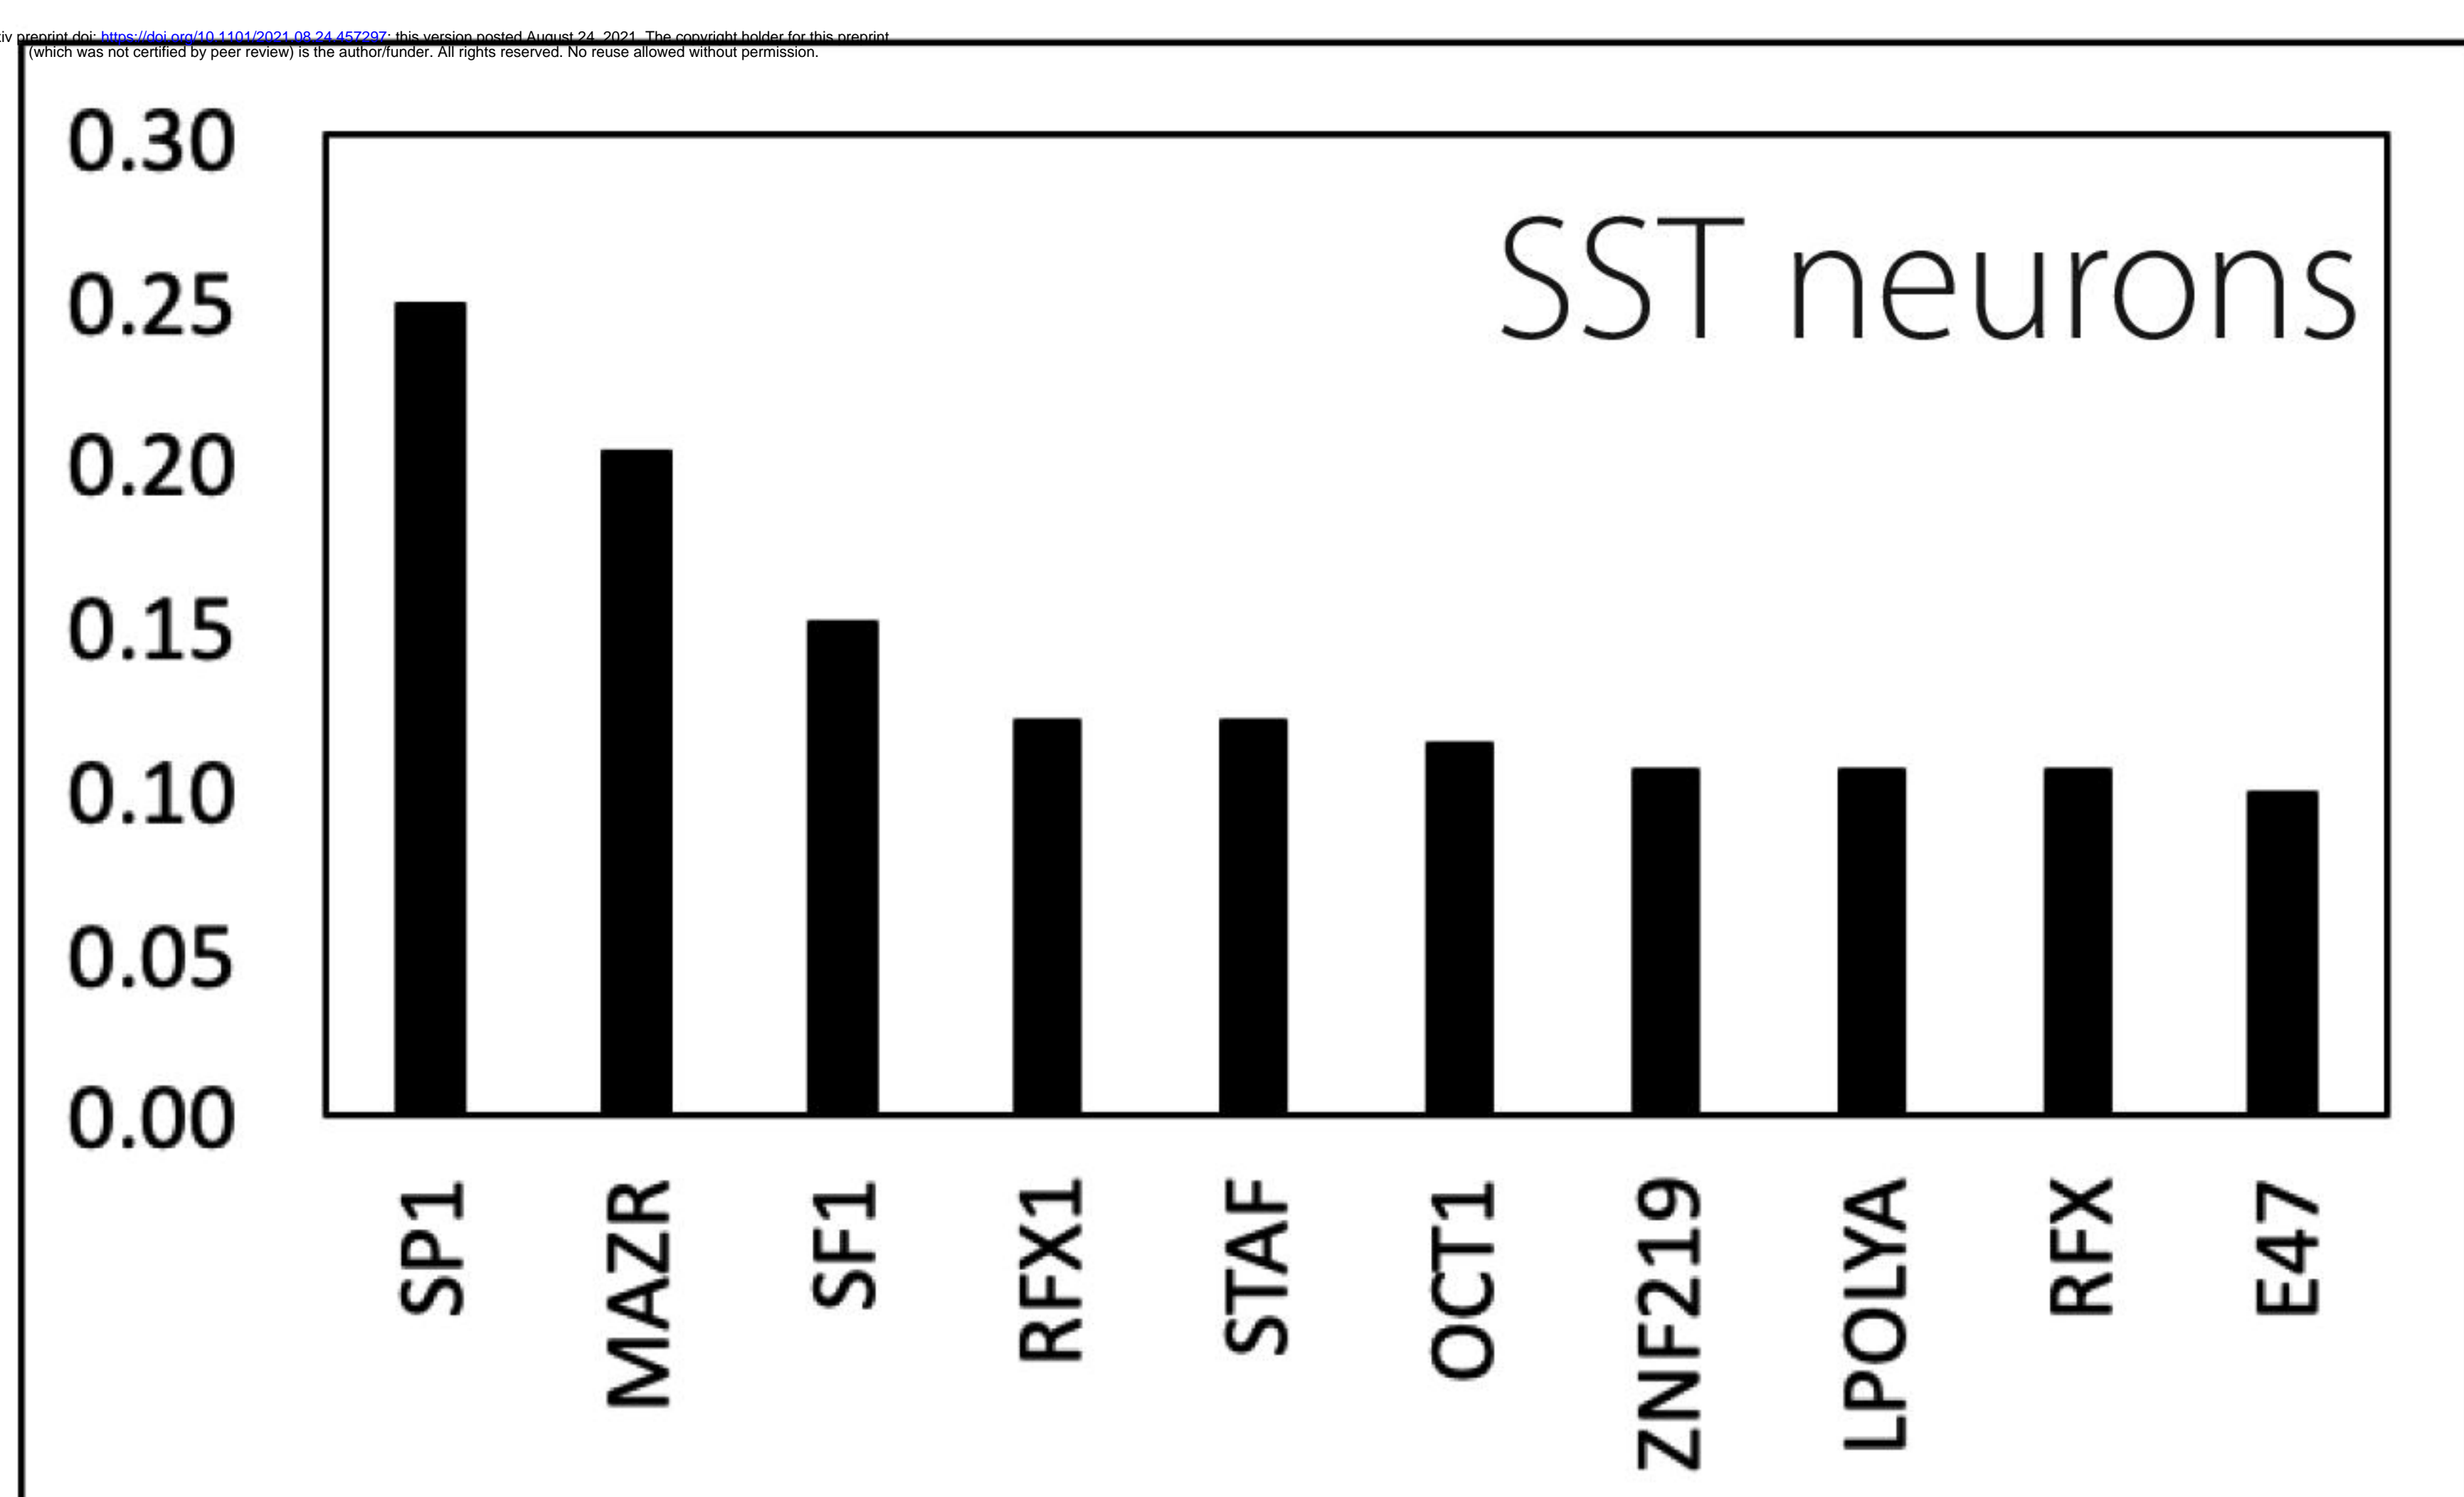

**B** TF with enriched binding sites in upregulated DEGs in MECP2- neurons (Greenberg)

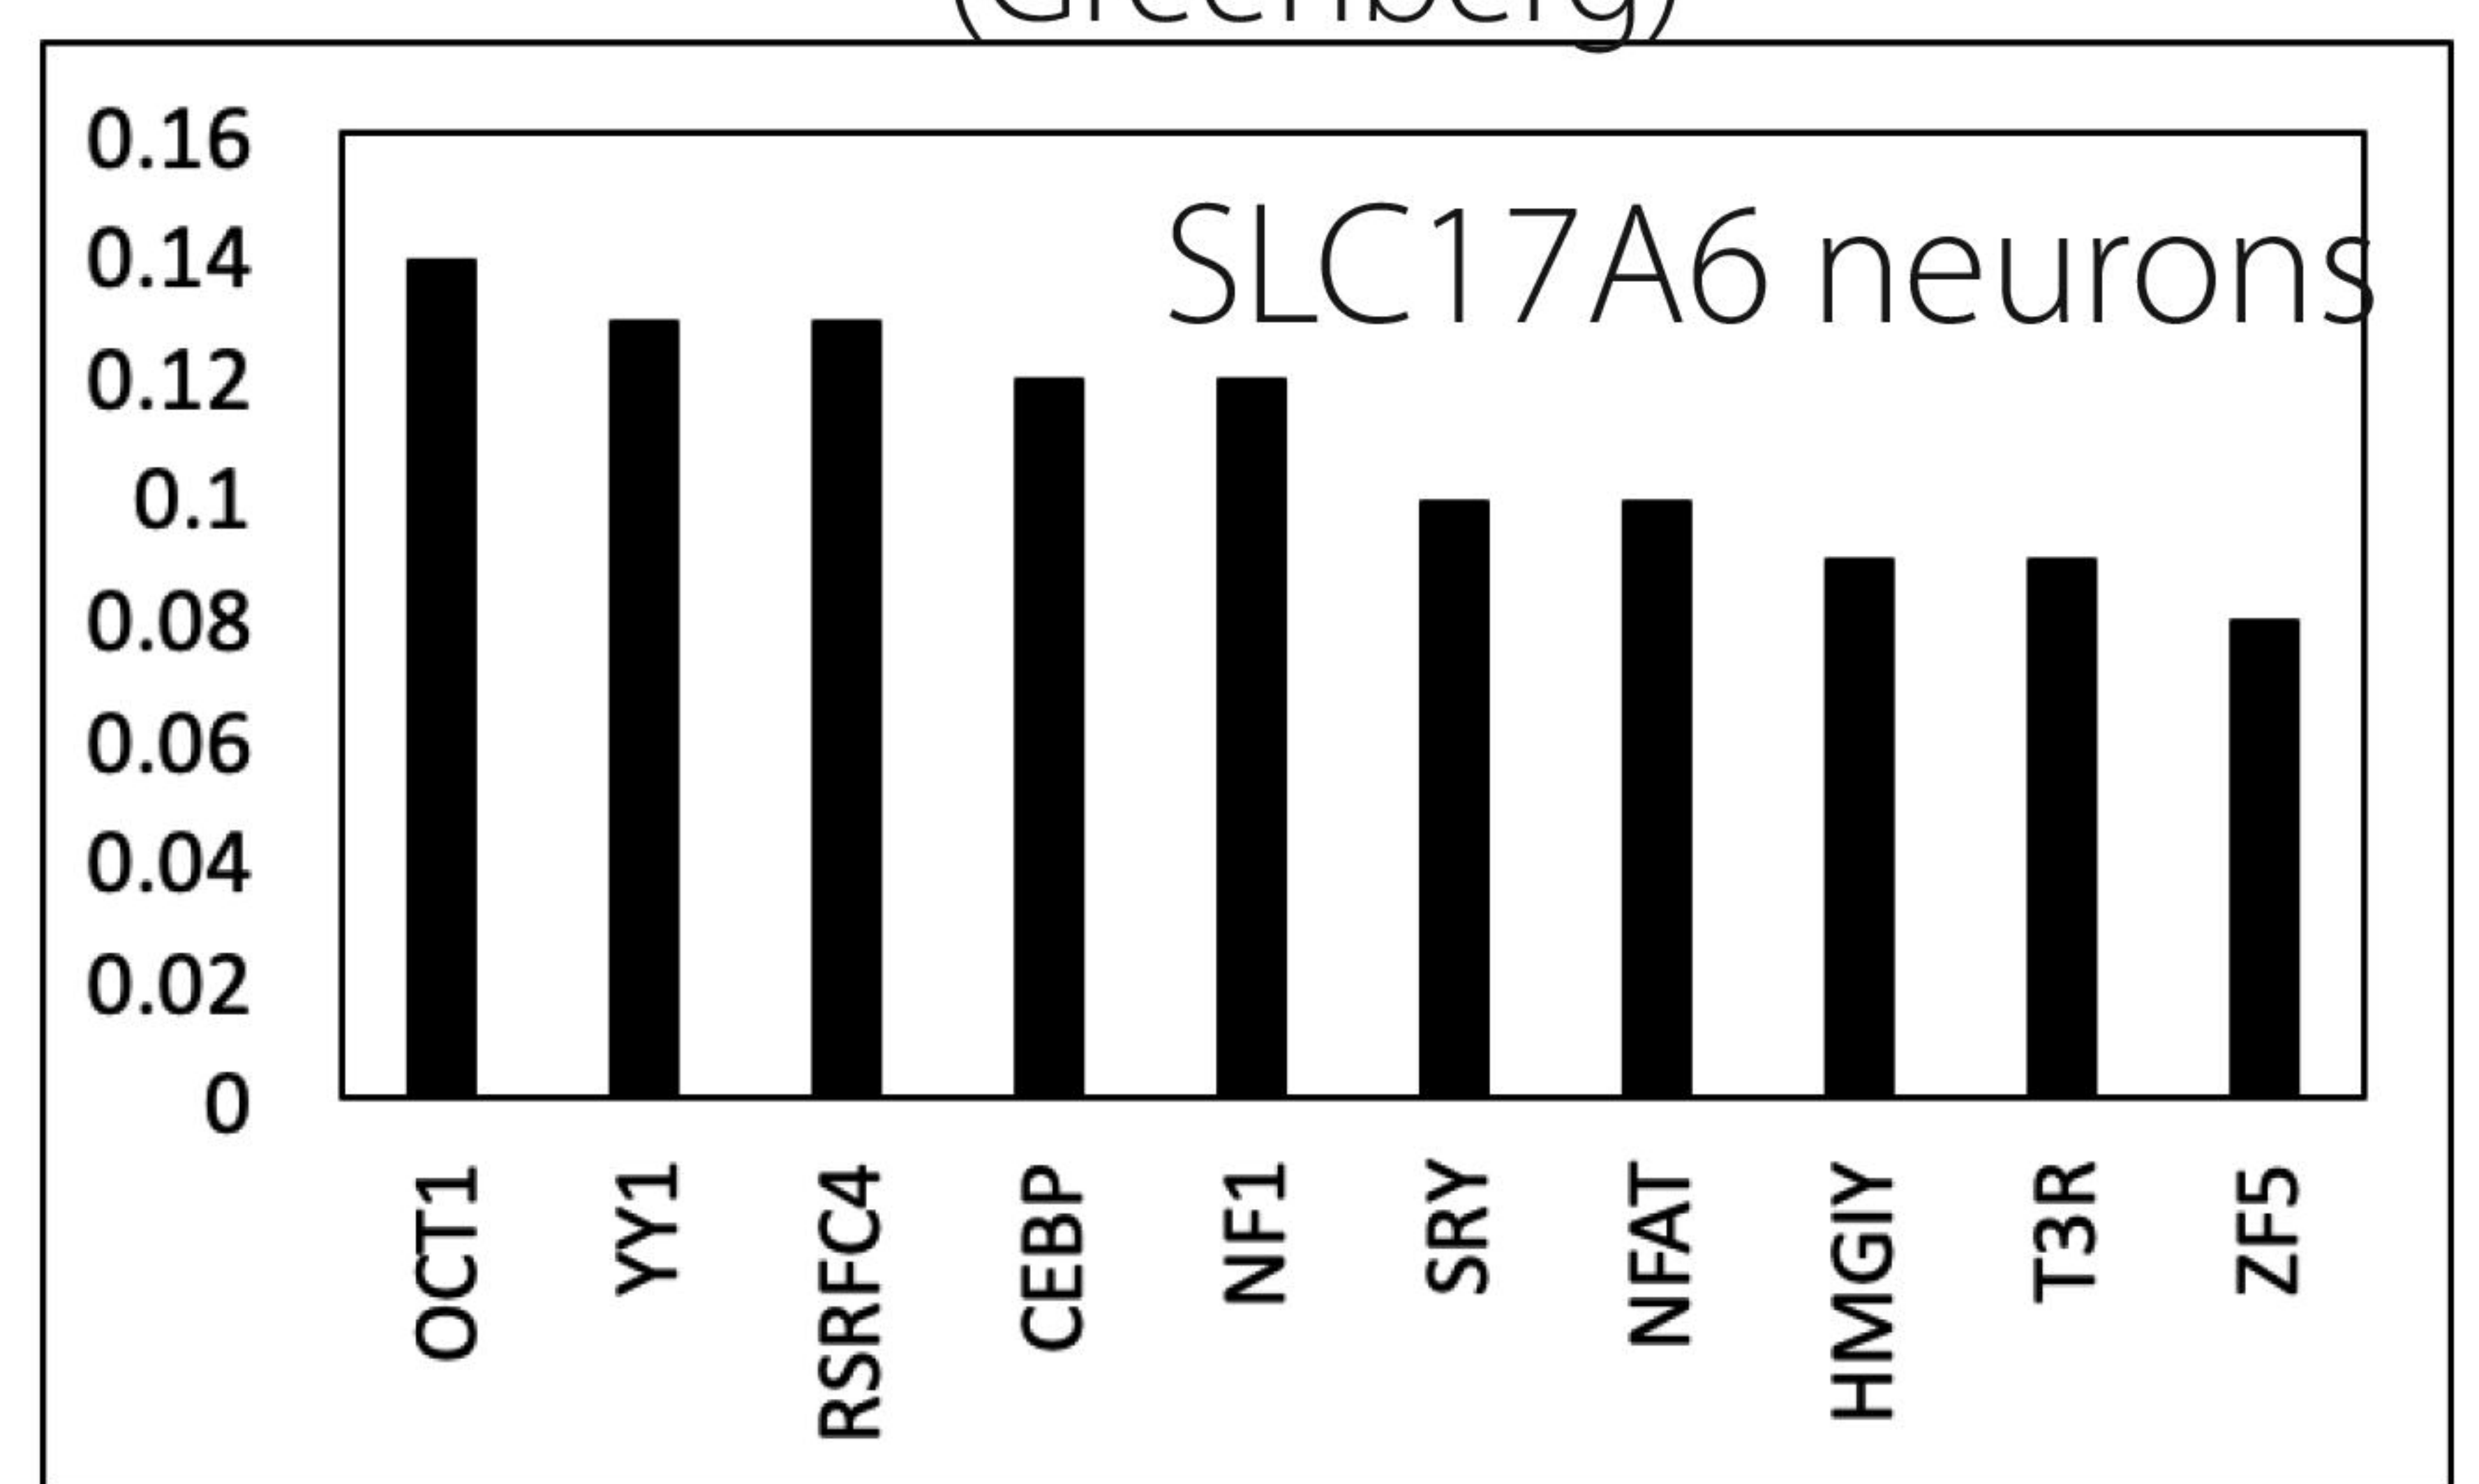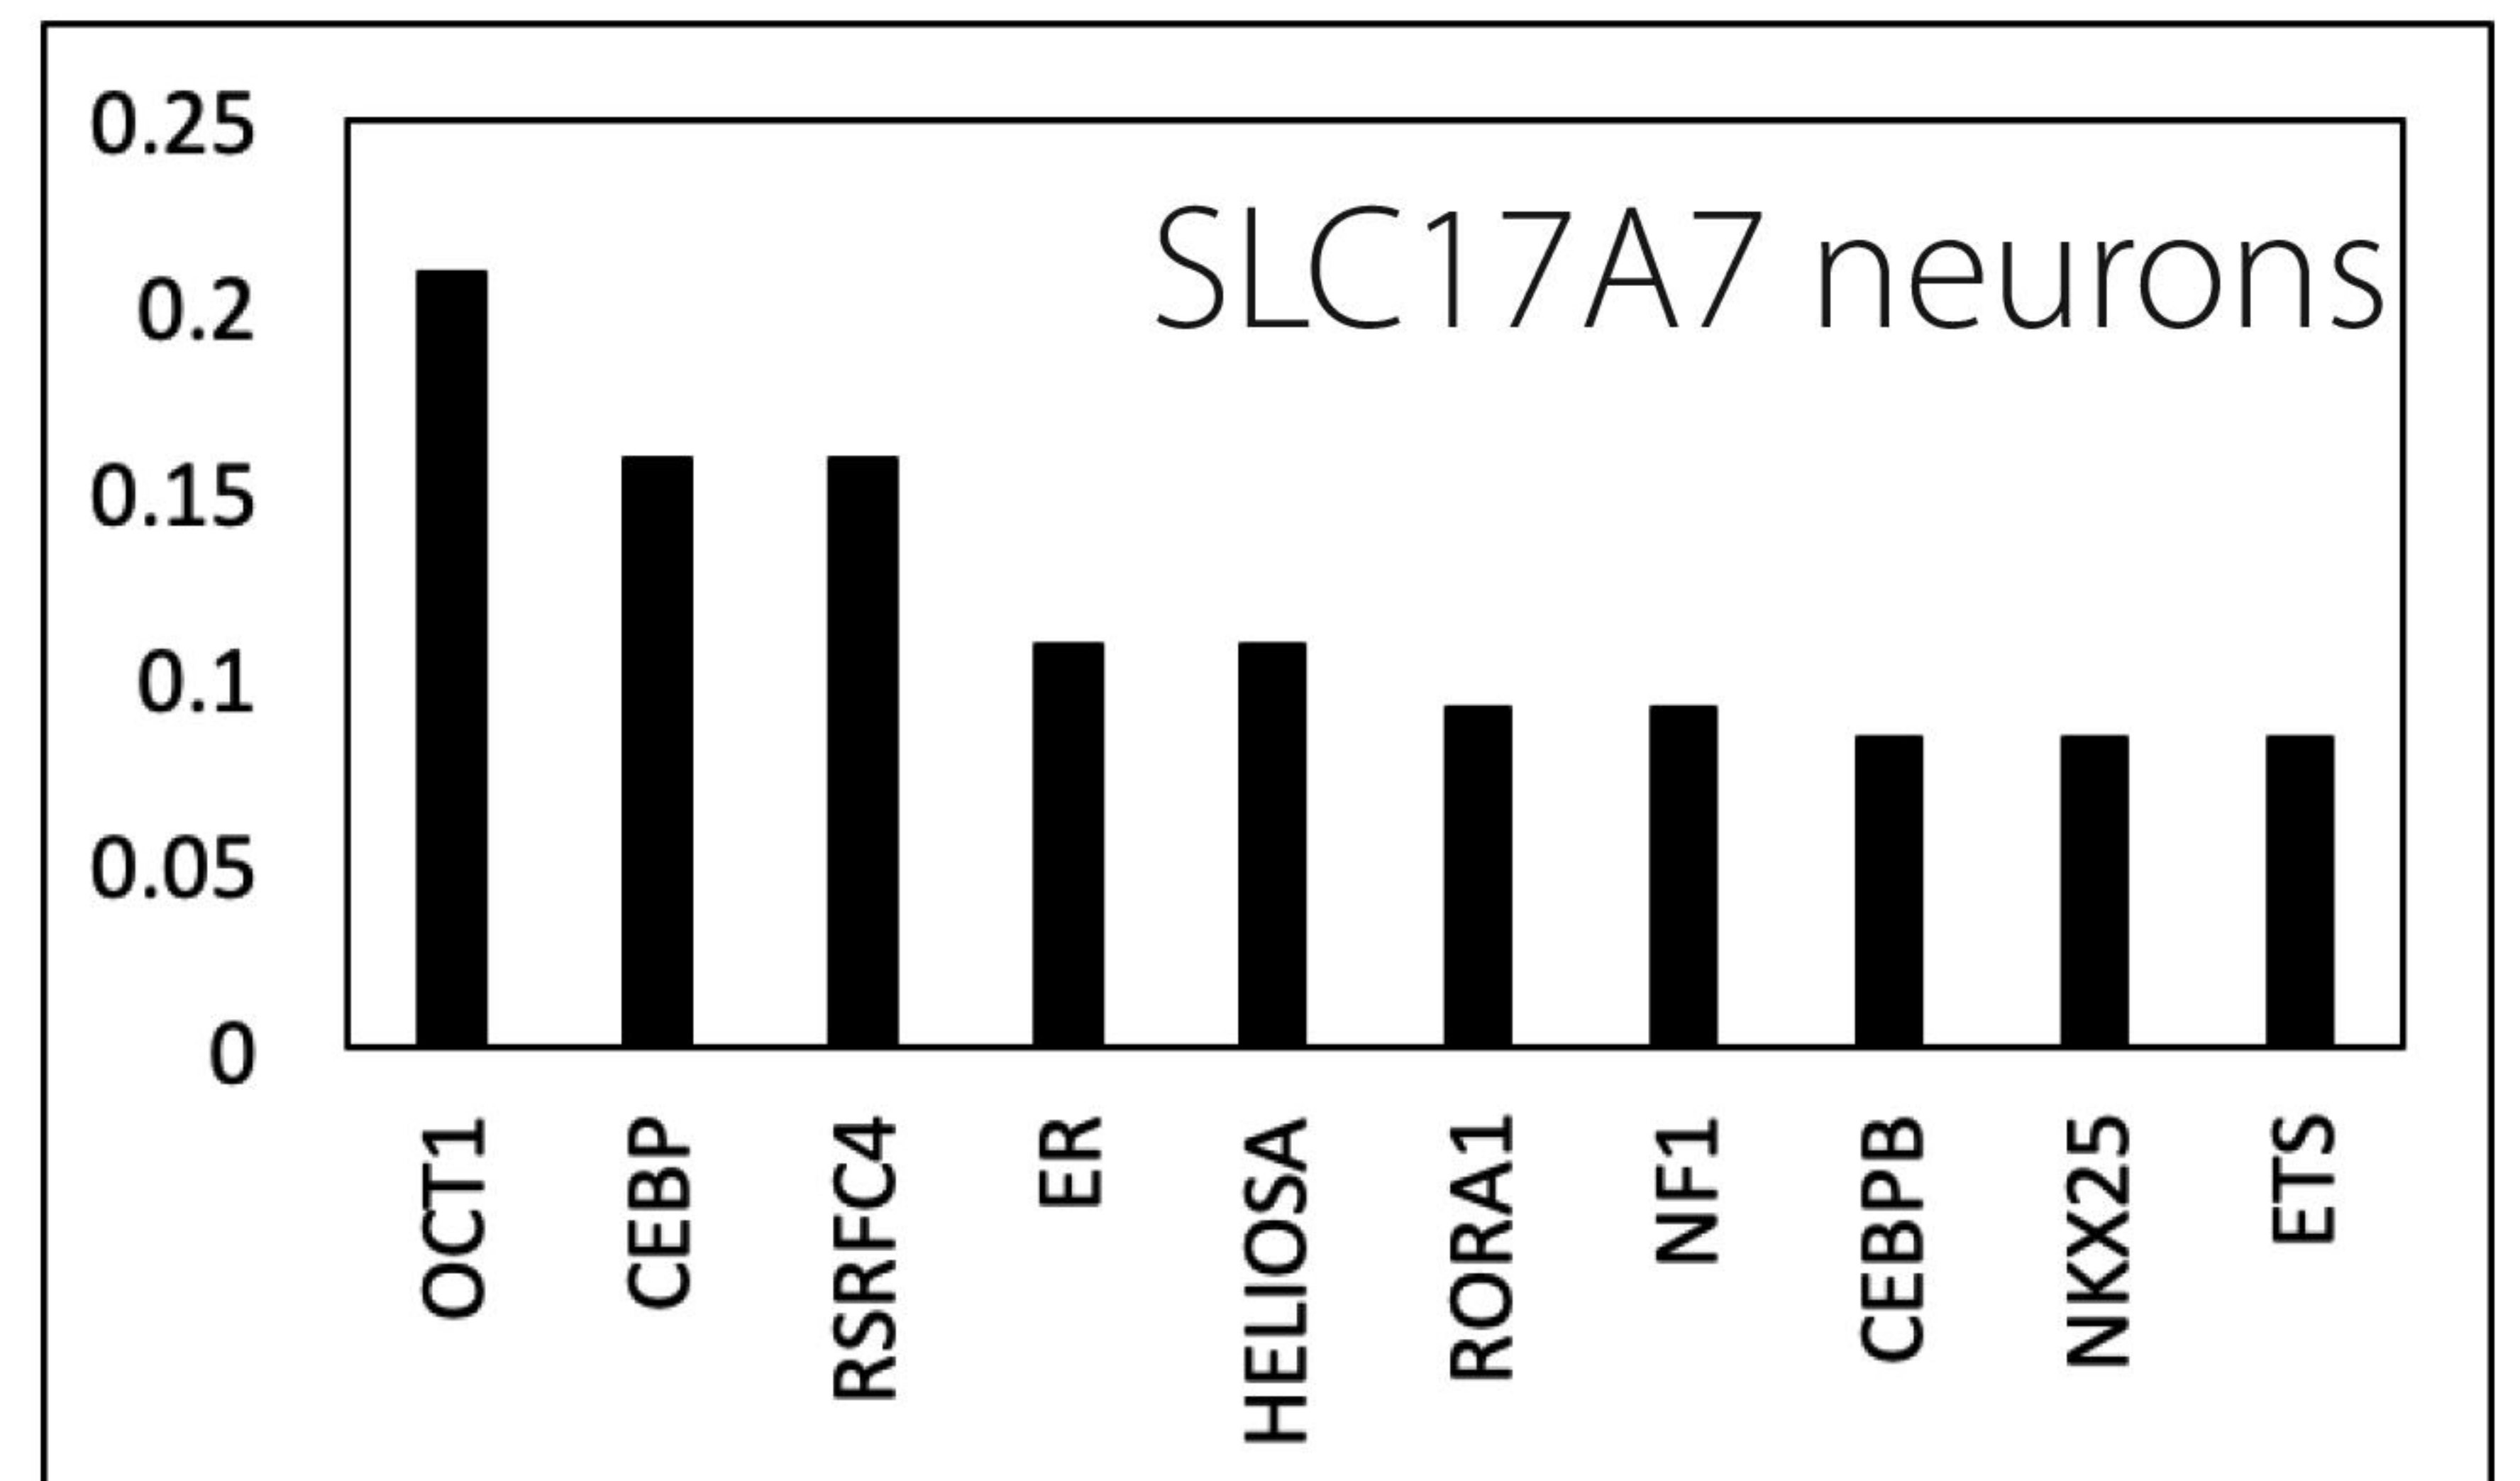

**C** TF with enriched binding sites in upregulated DEGs in bulk-RNA-seq

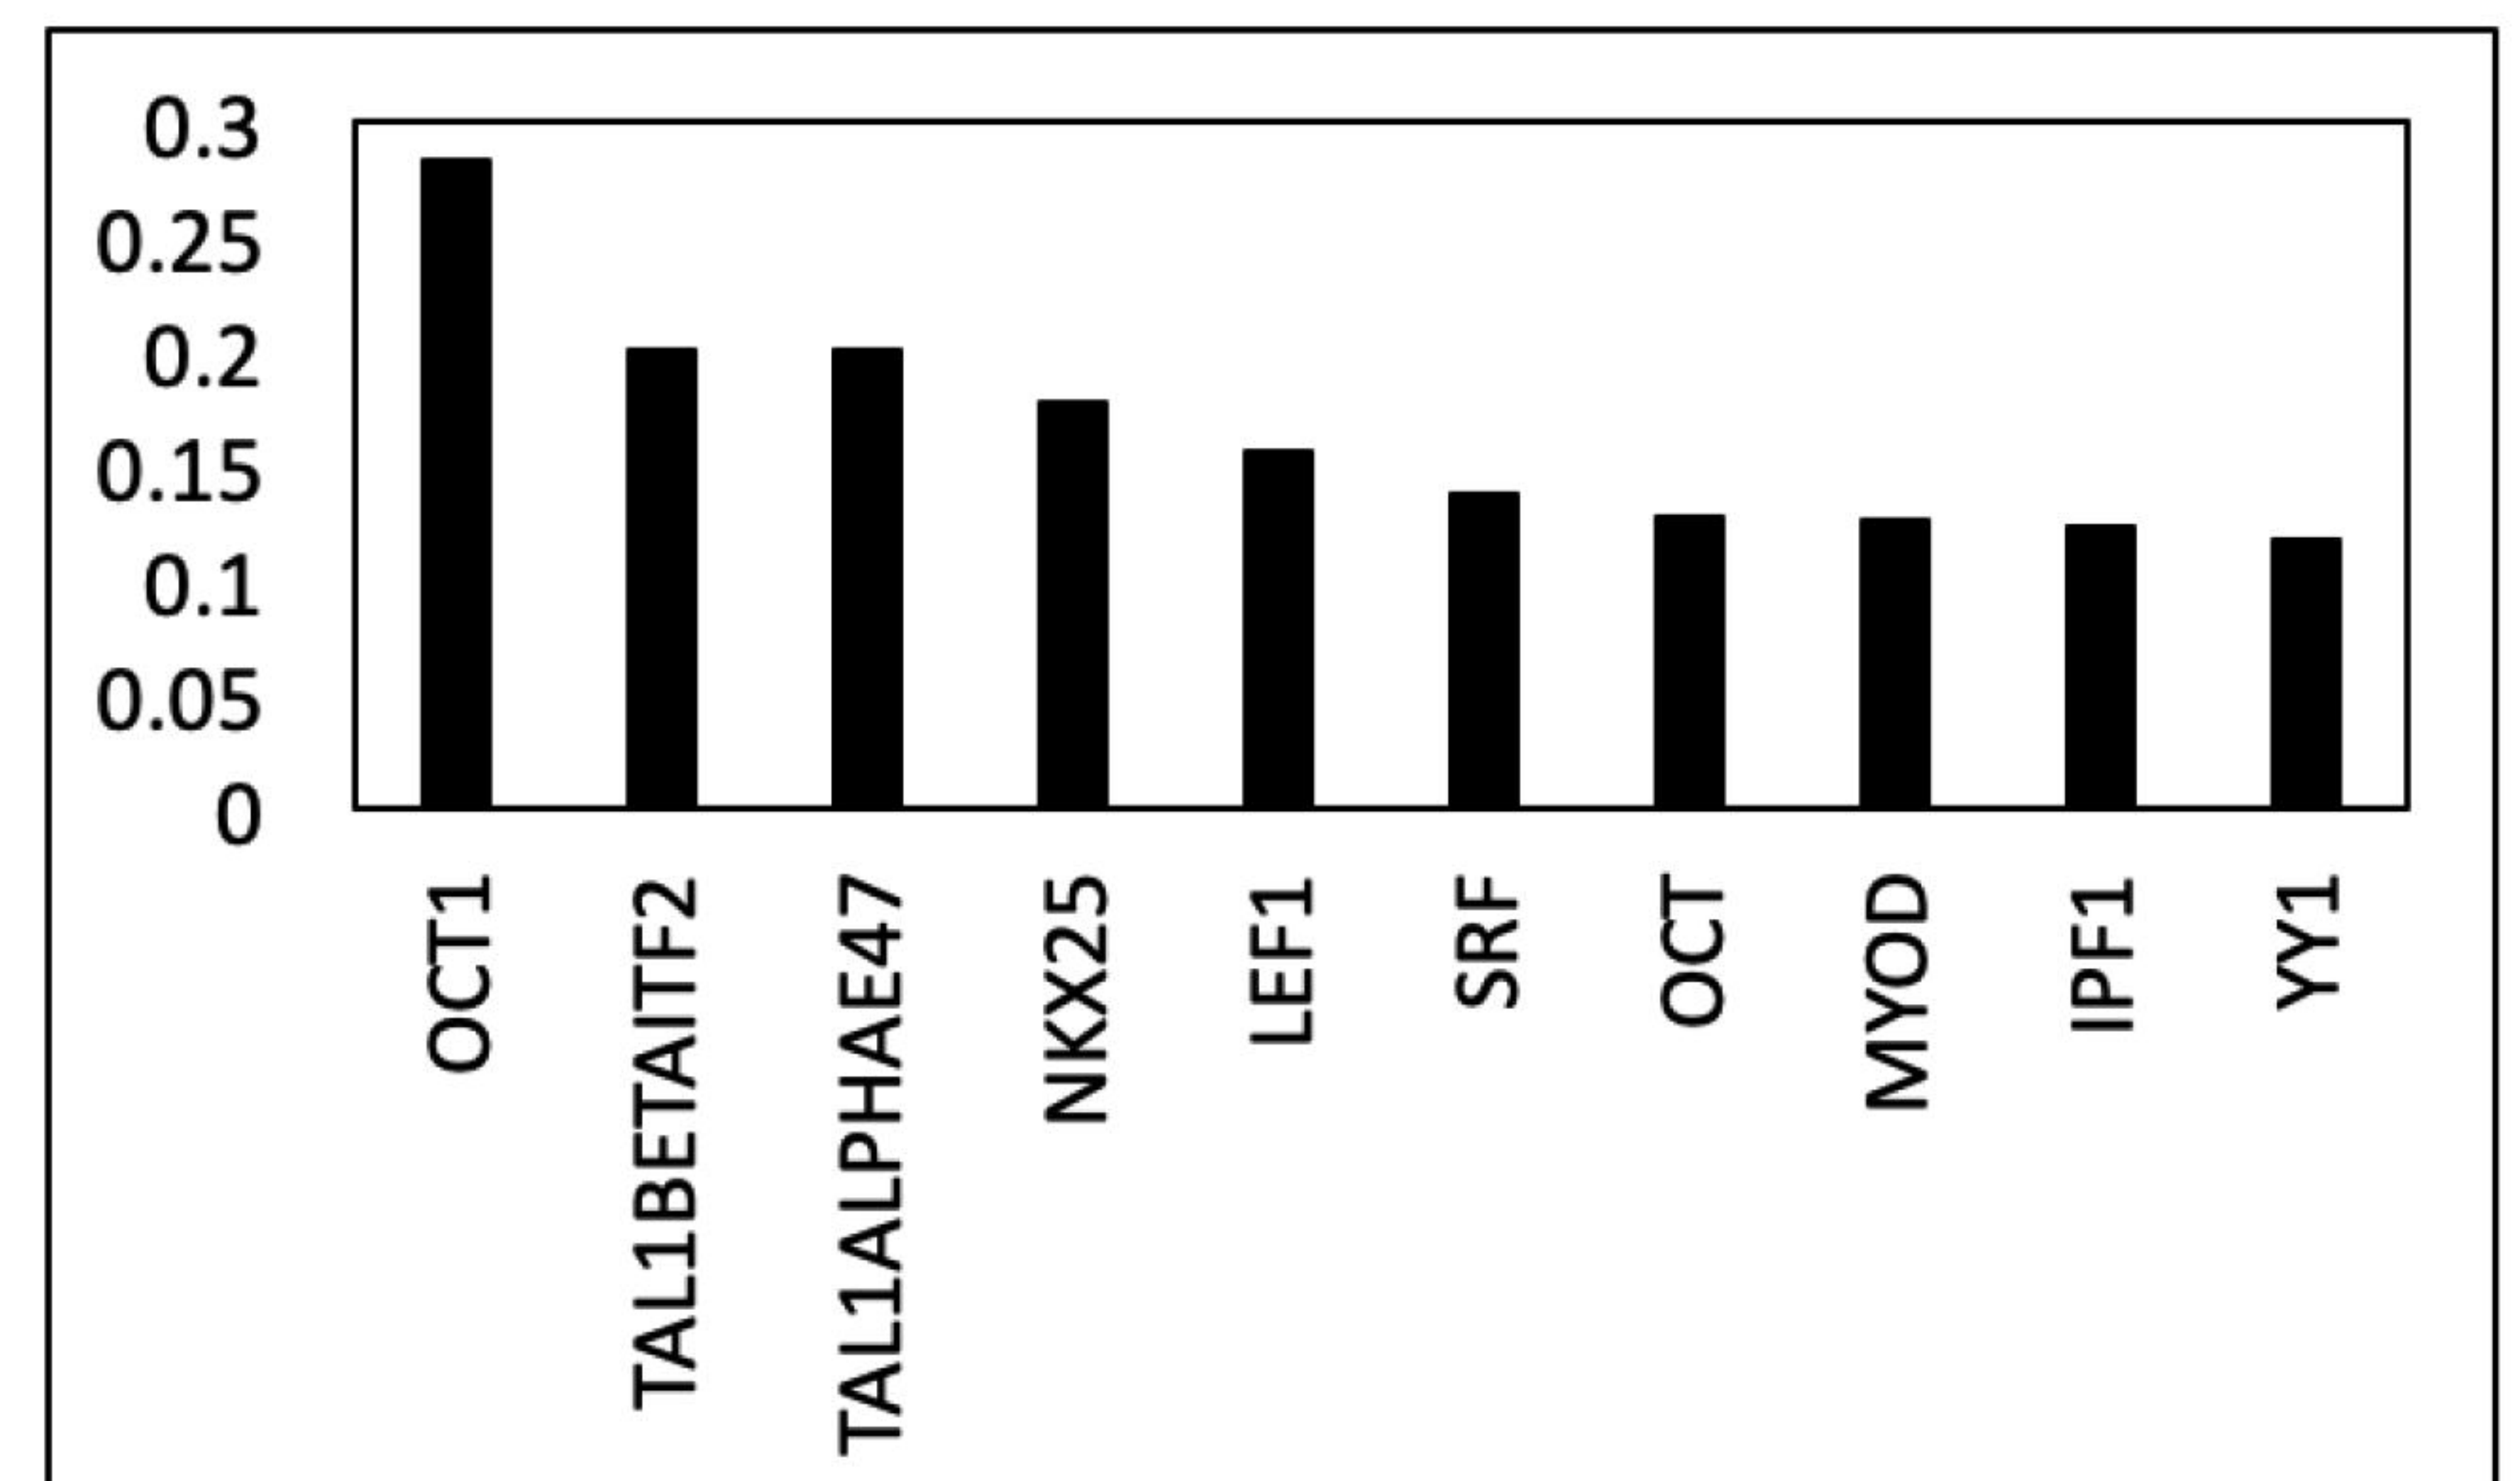

**D** Expression pattern of top TFs in brain (atlas)

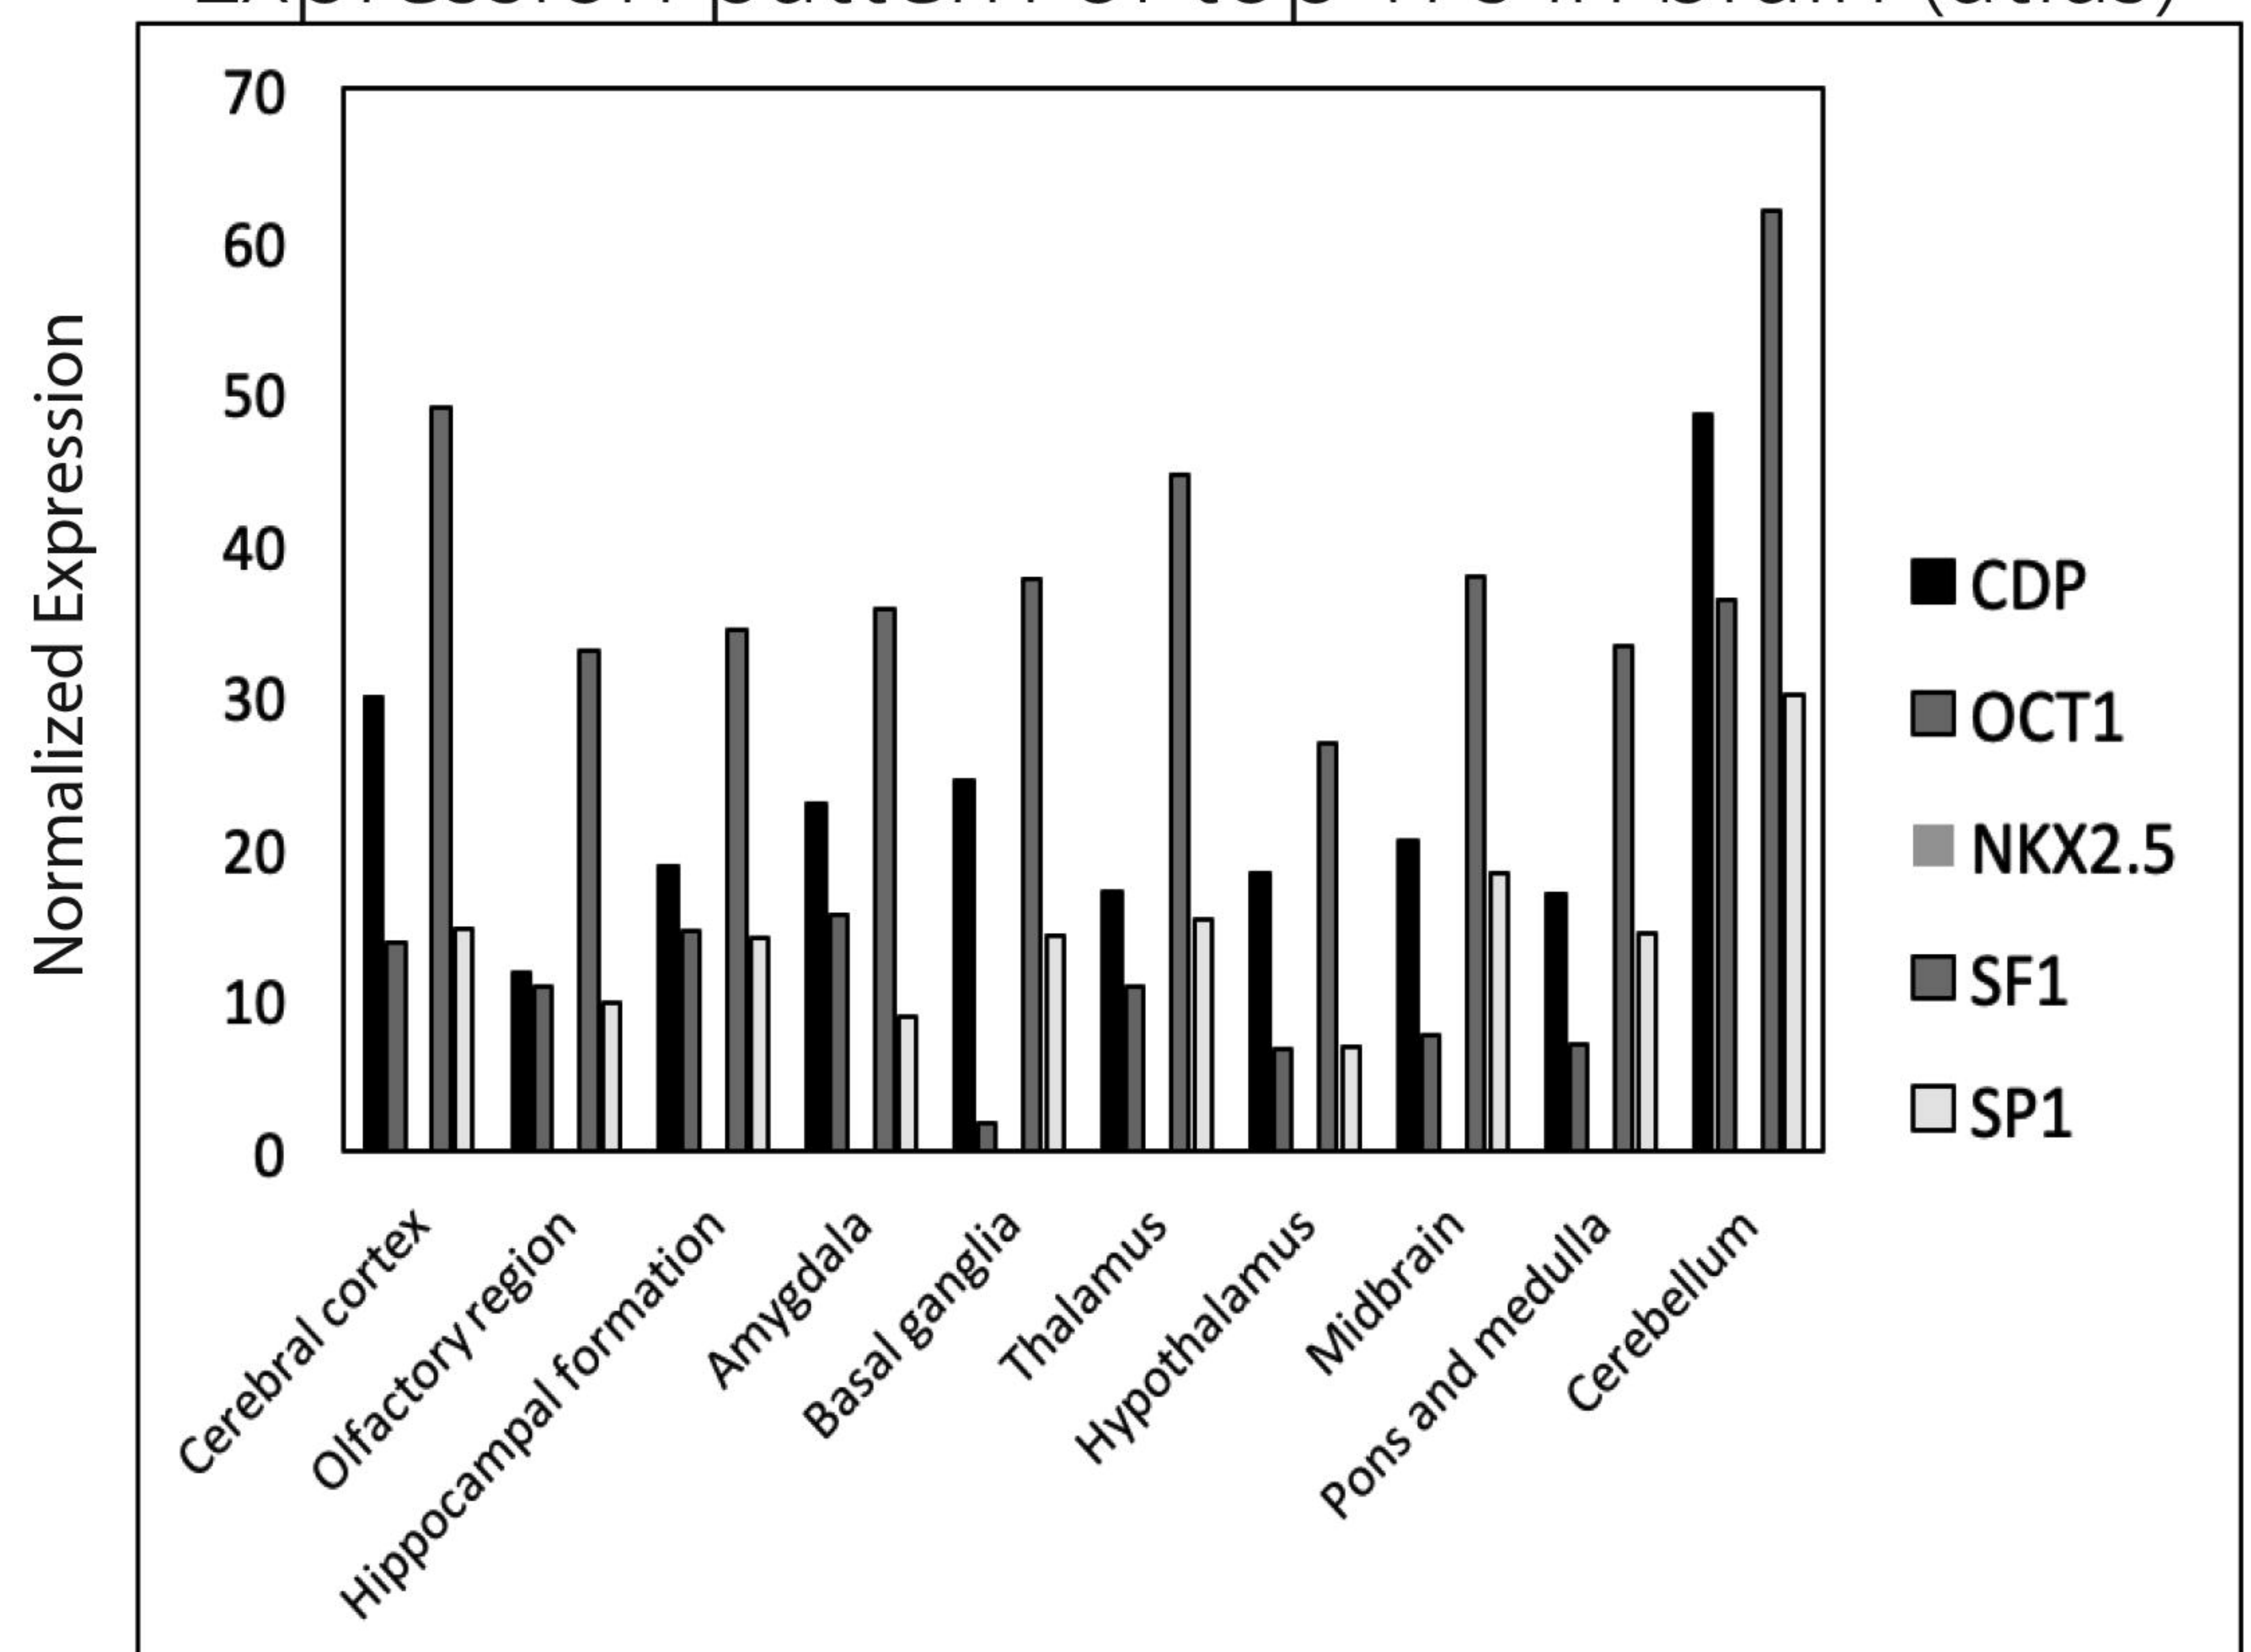

A

TFs governing downregulated genes  
in bulk 3i neurons

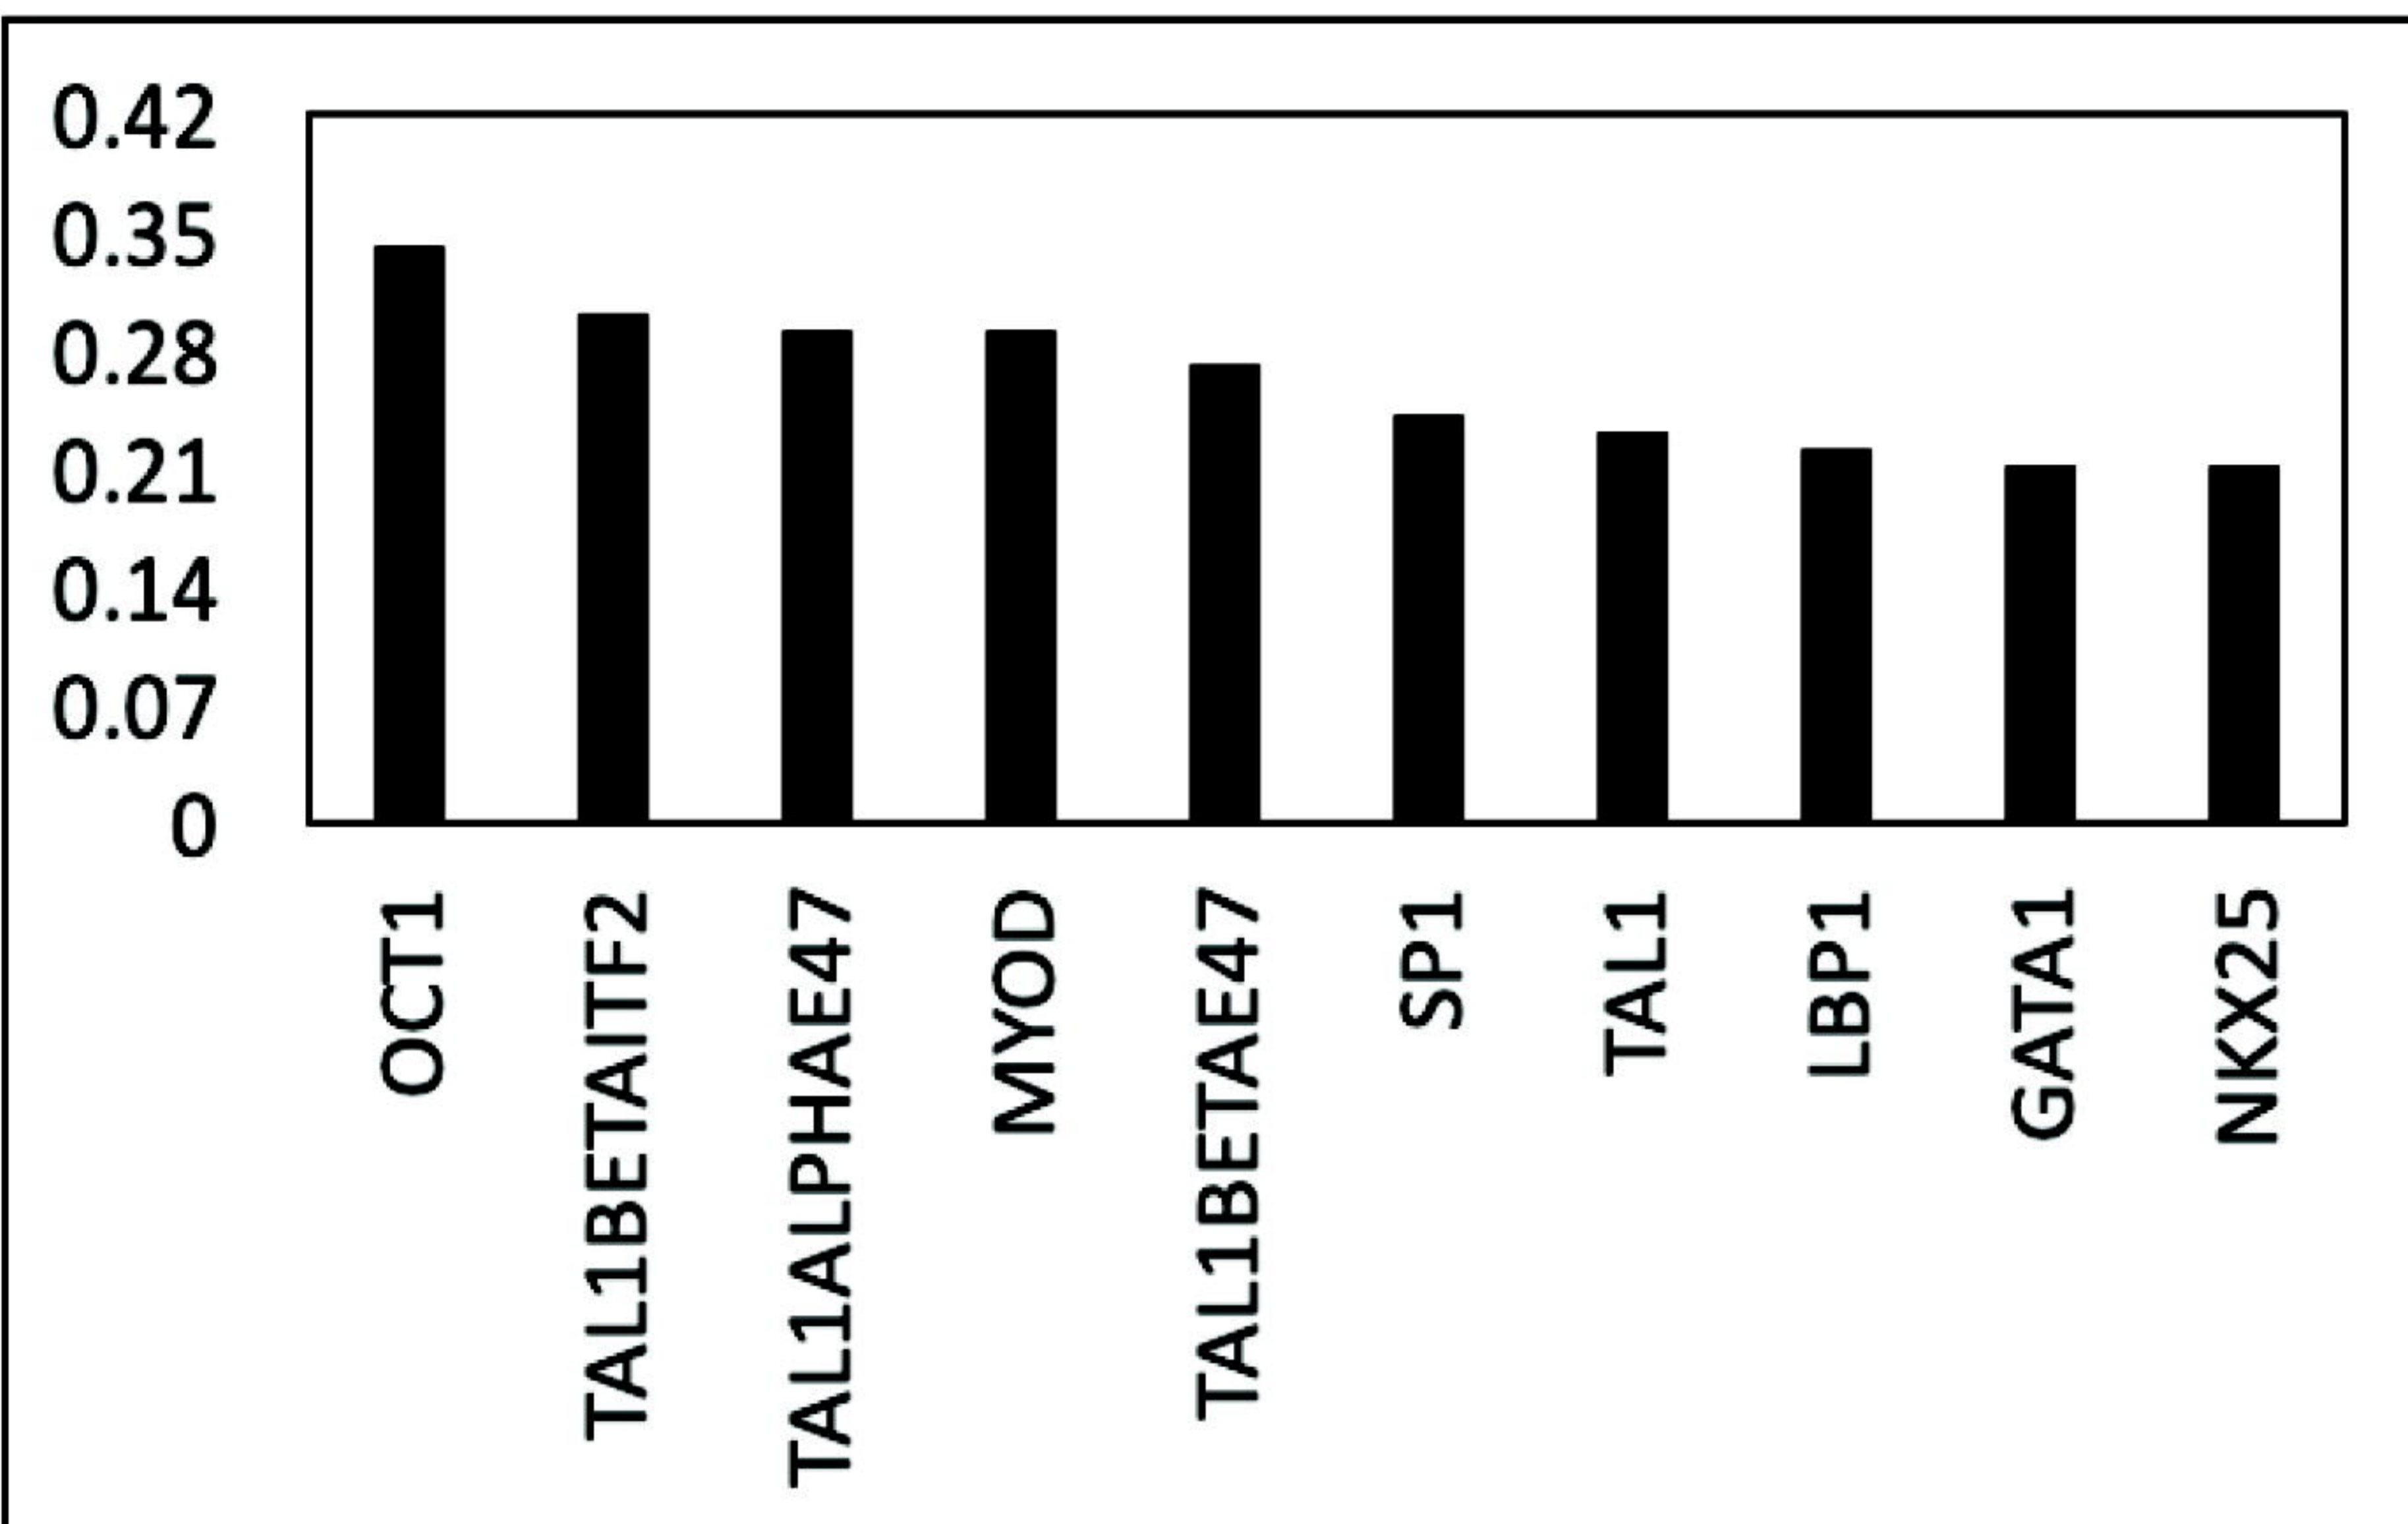

TFs governing upregulated genes  
in bulk 3i neurons

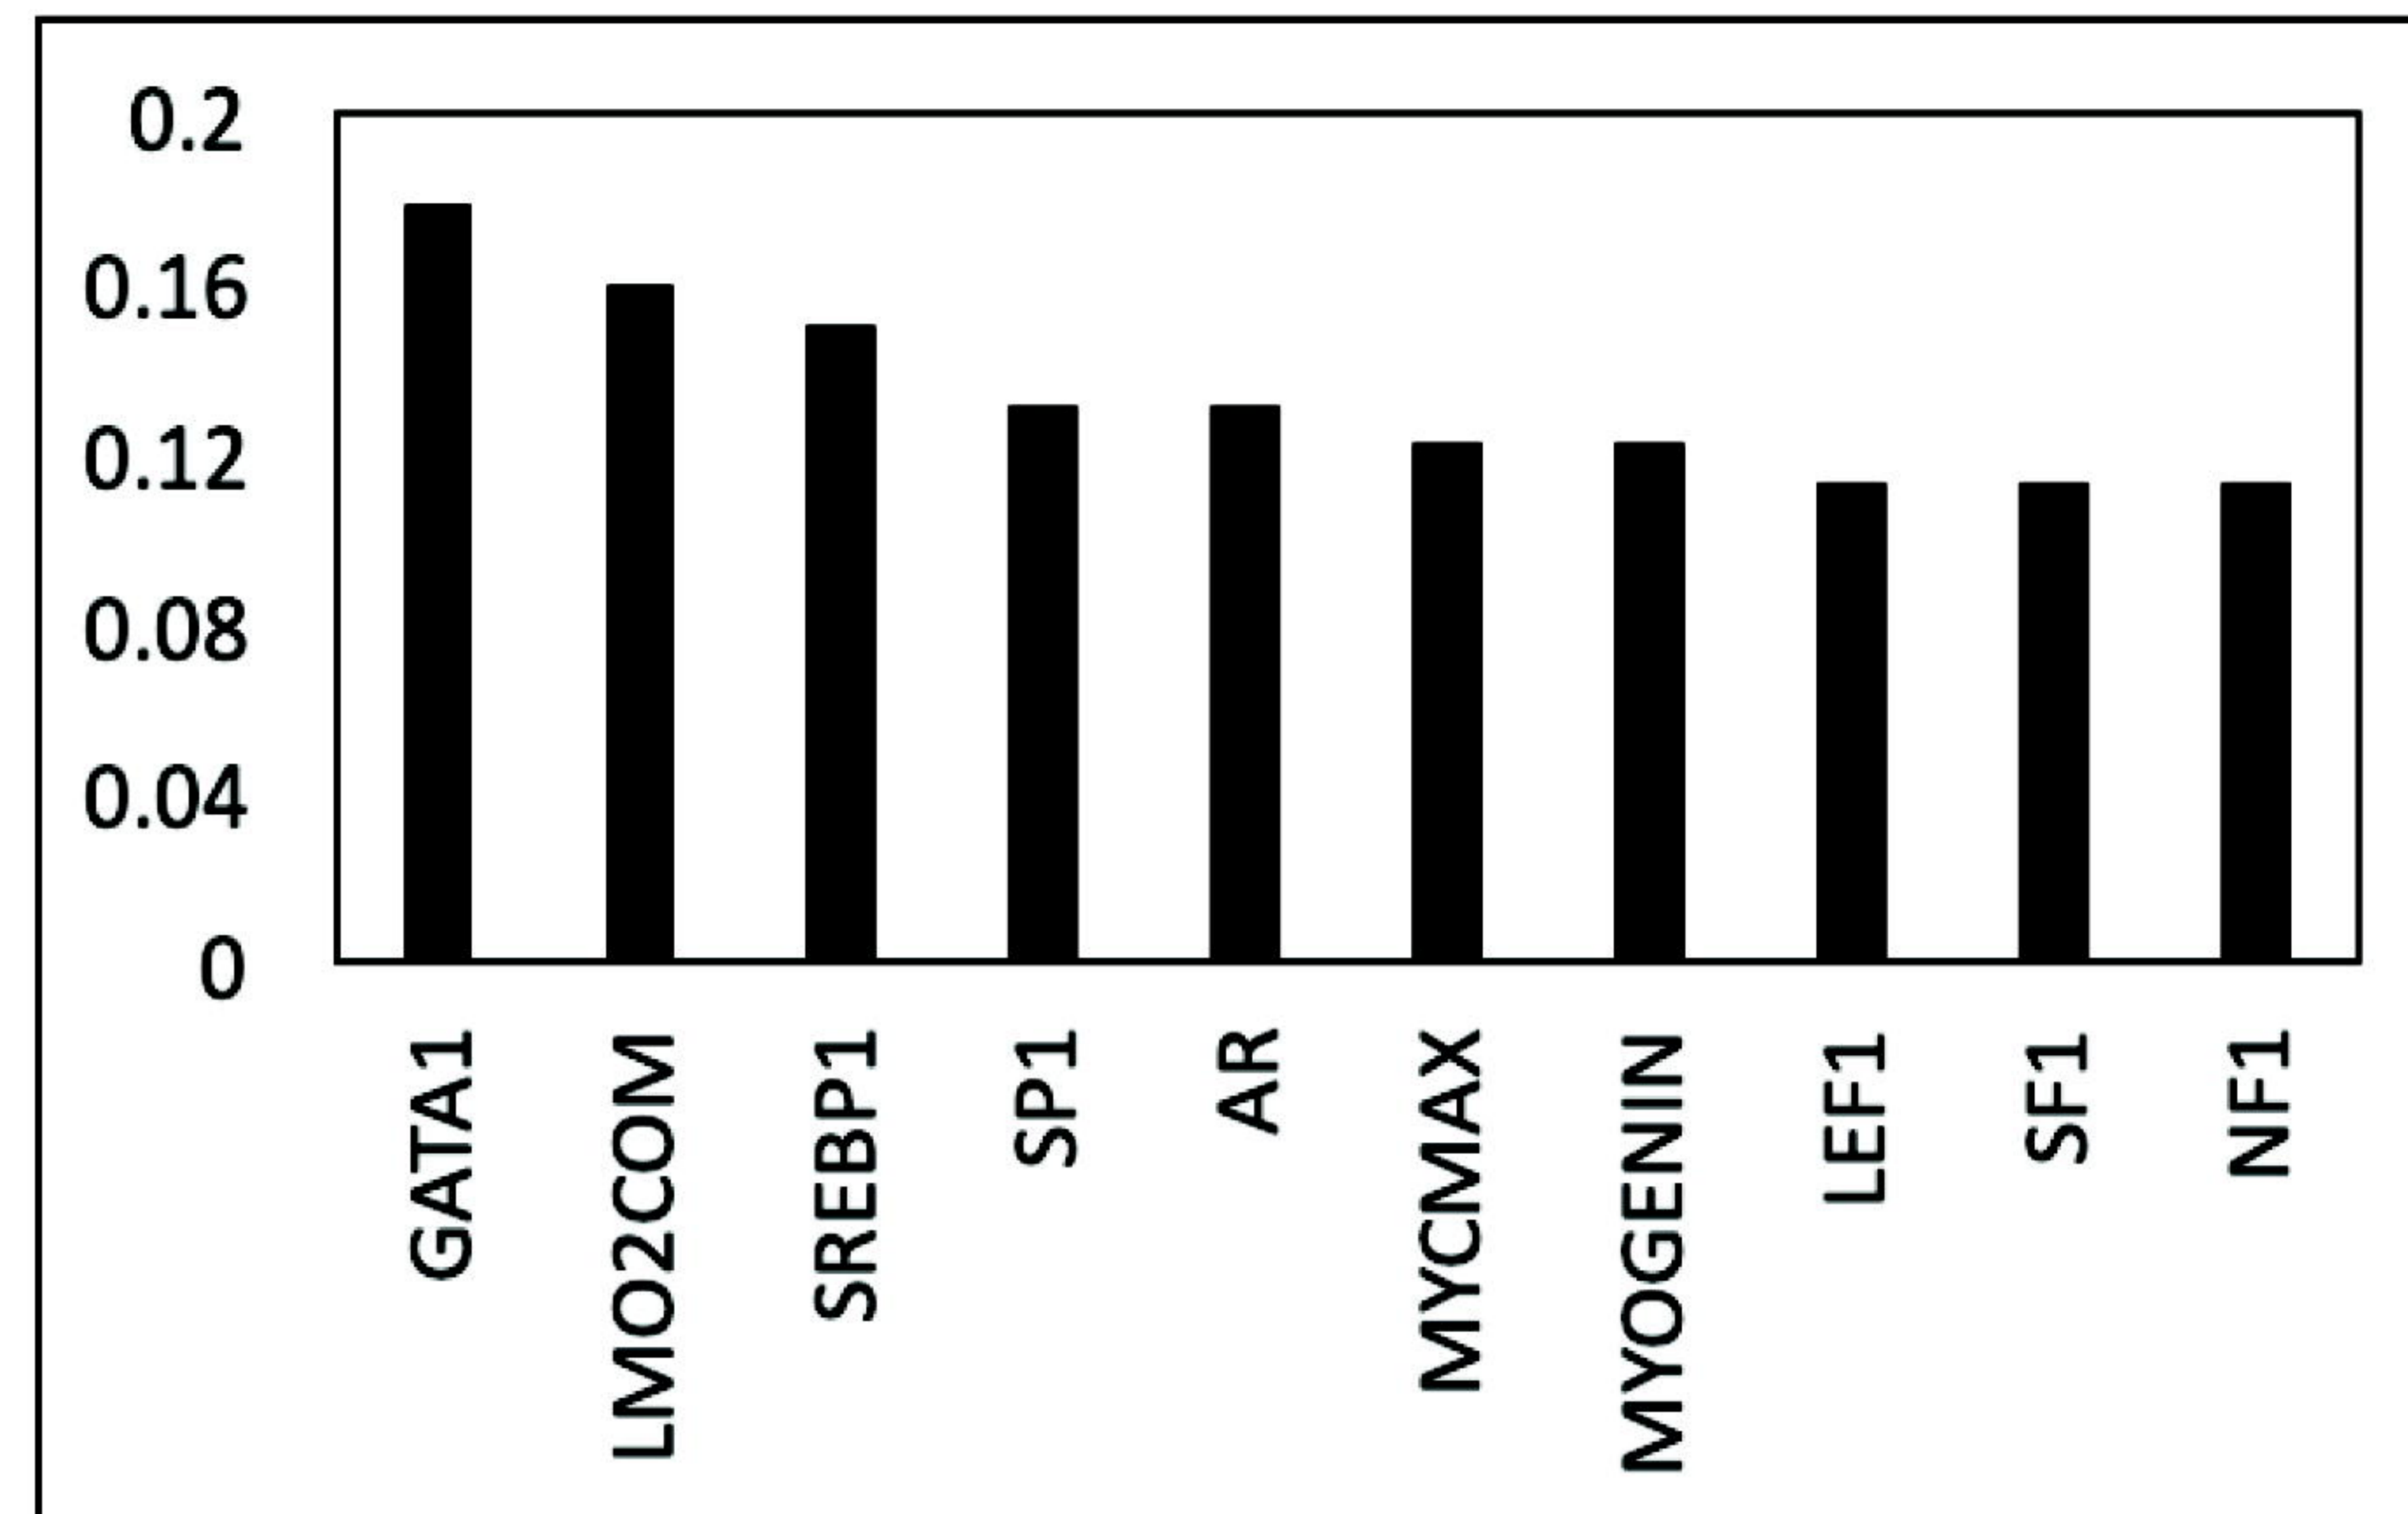

B

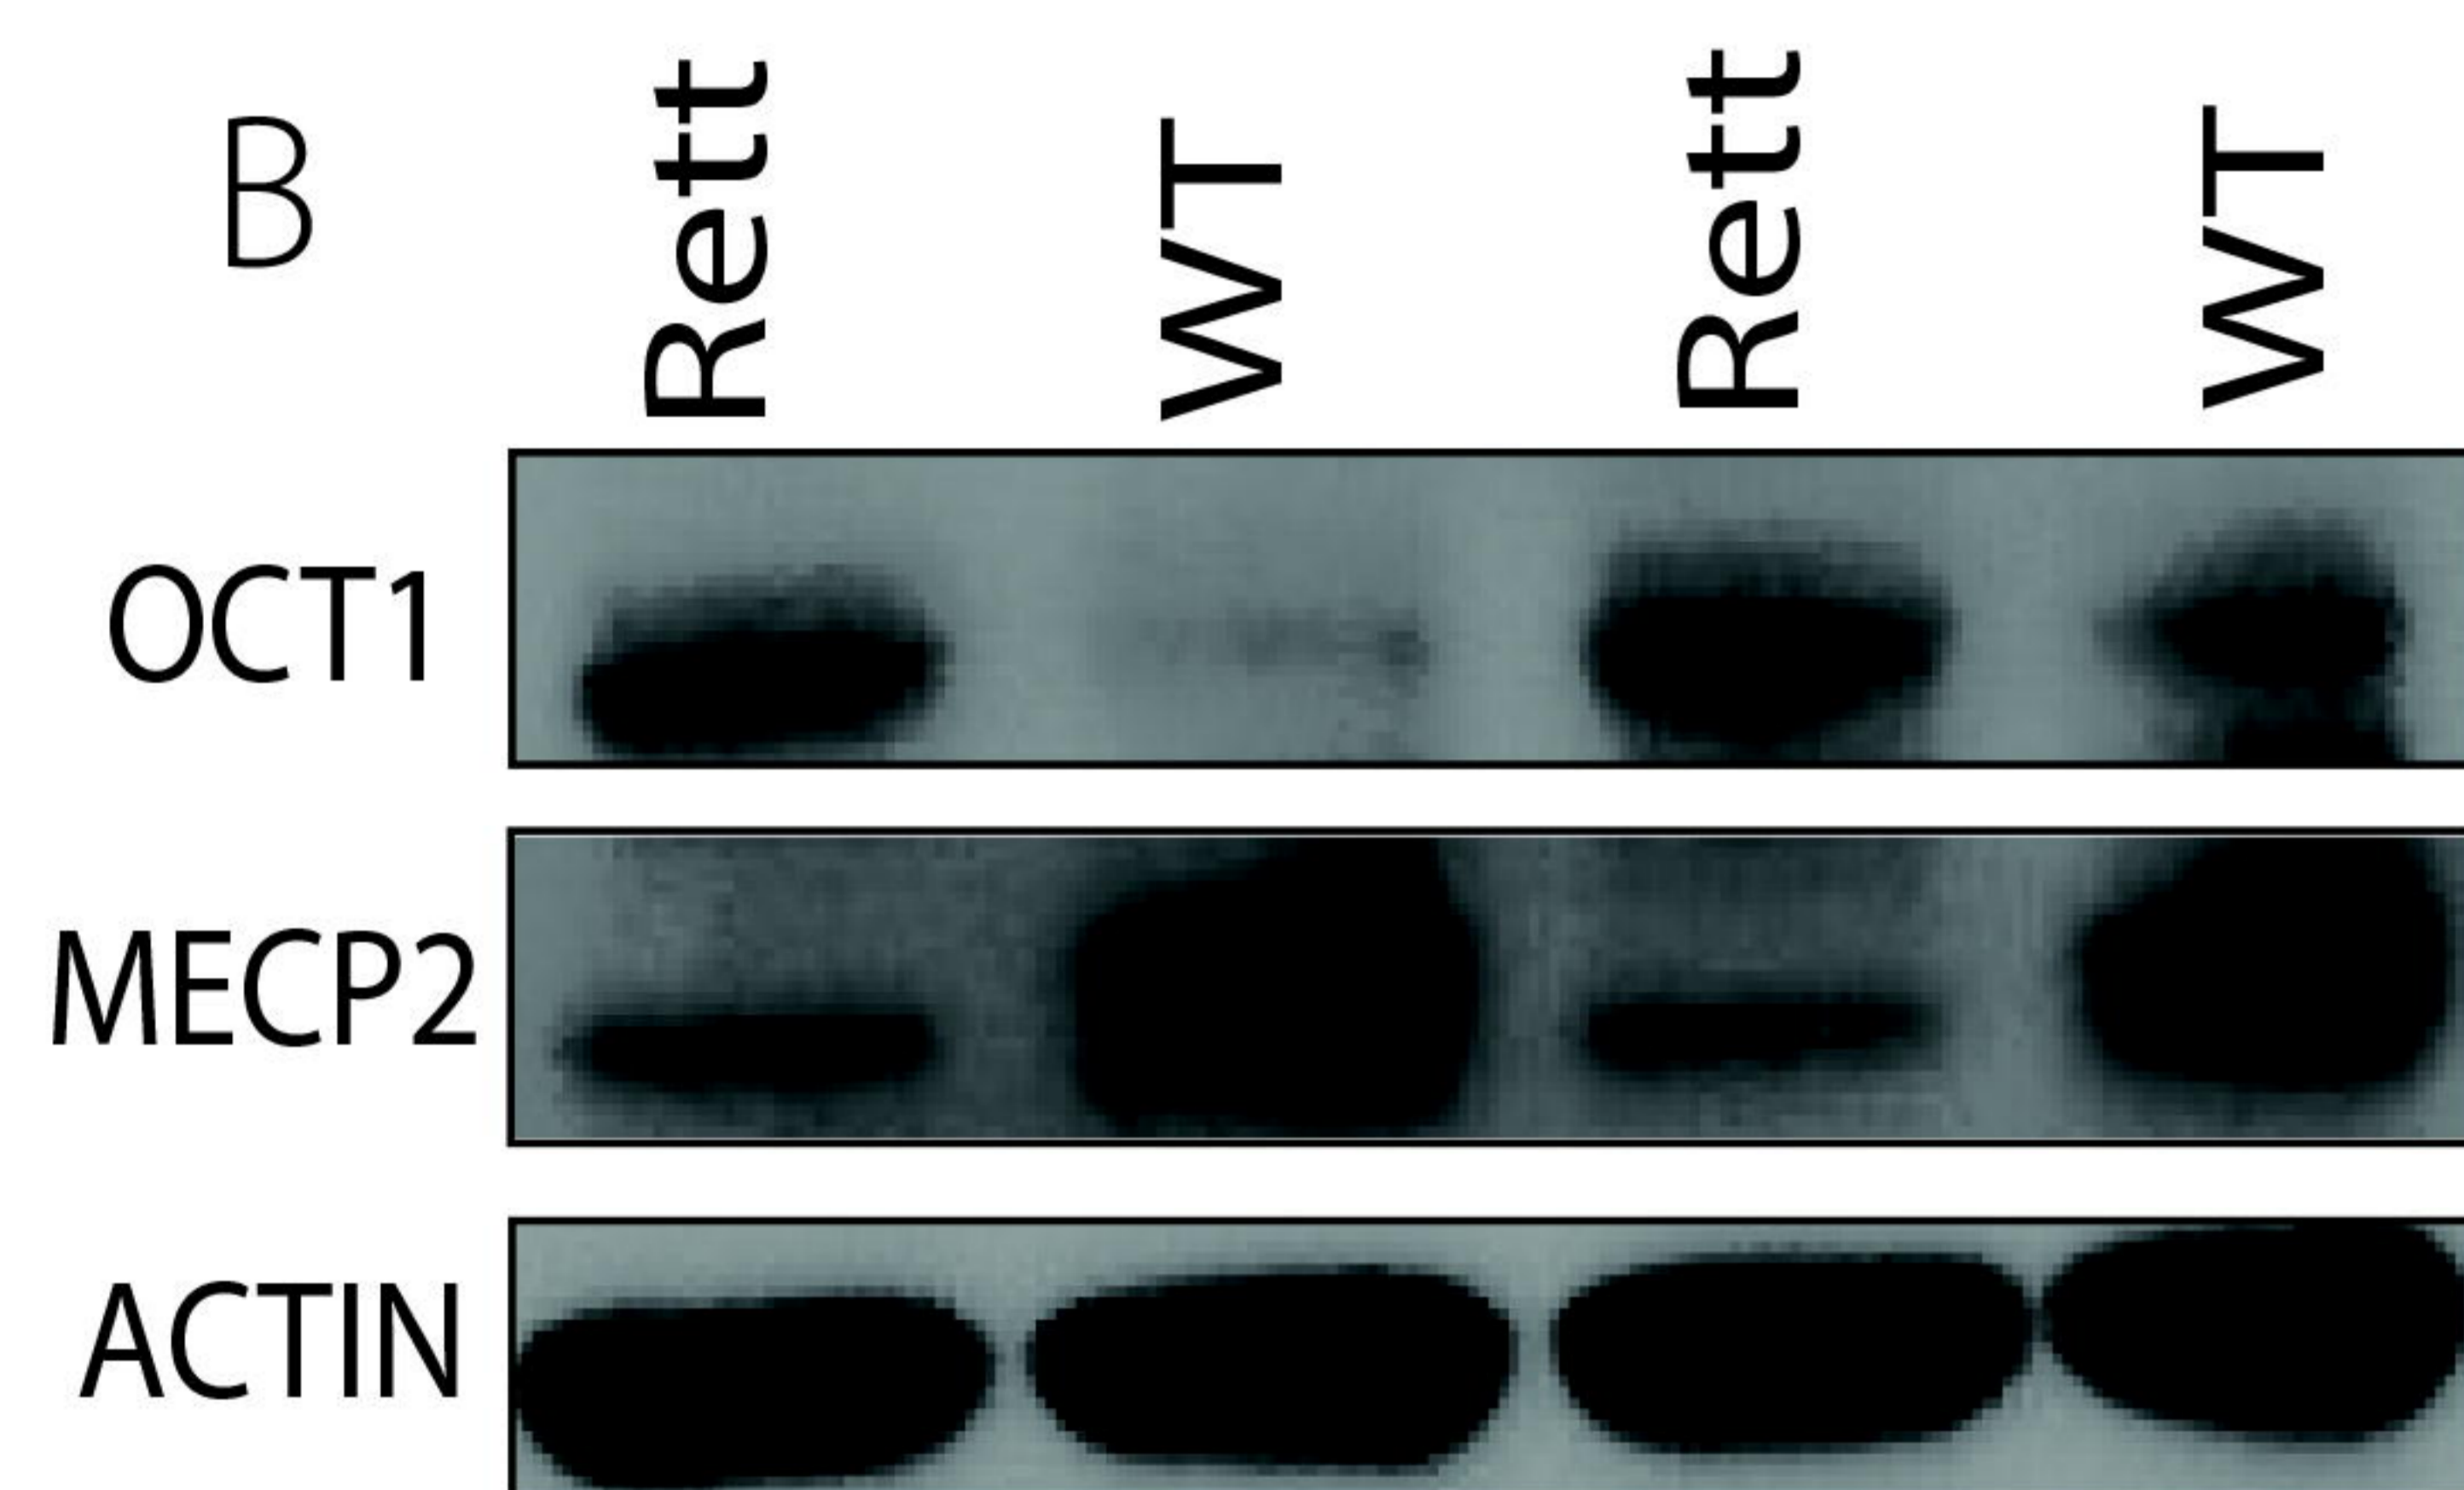

C

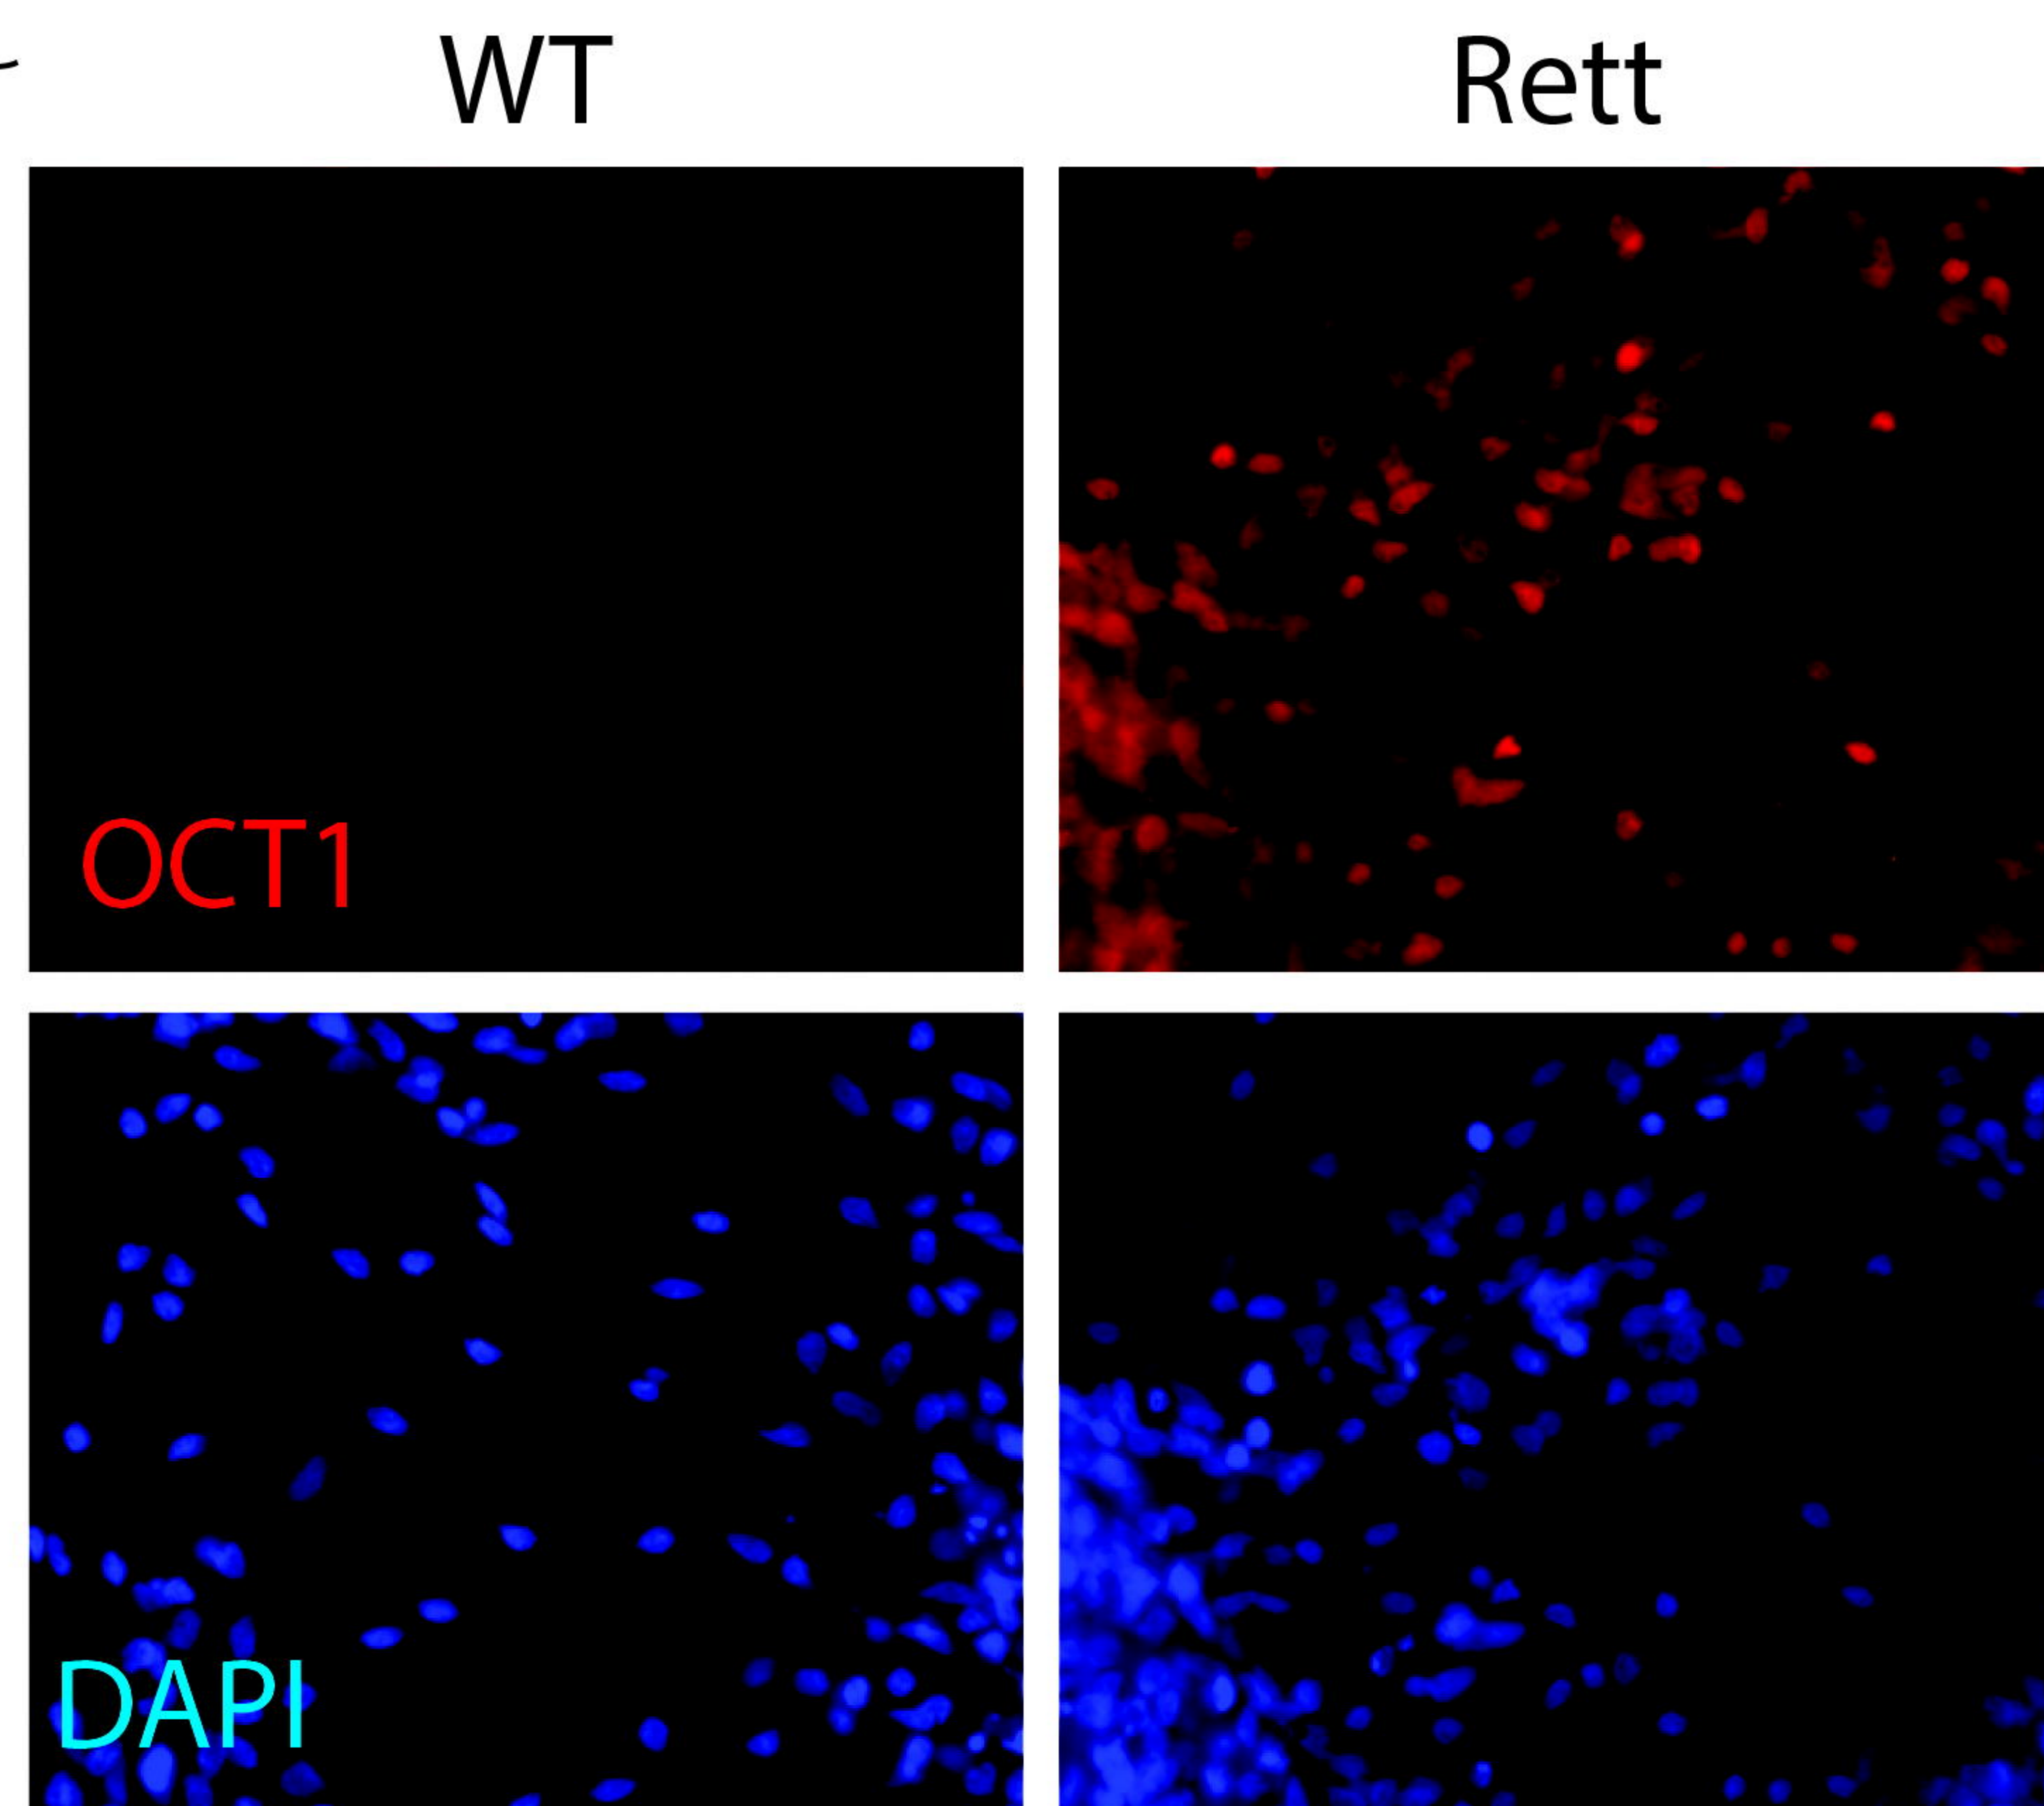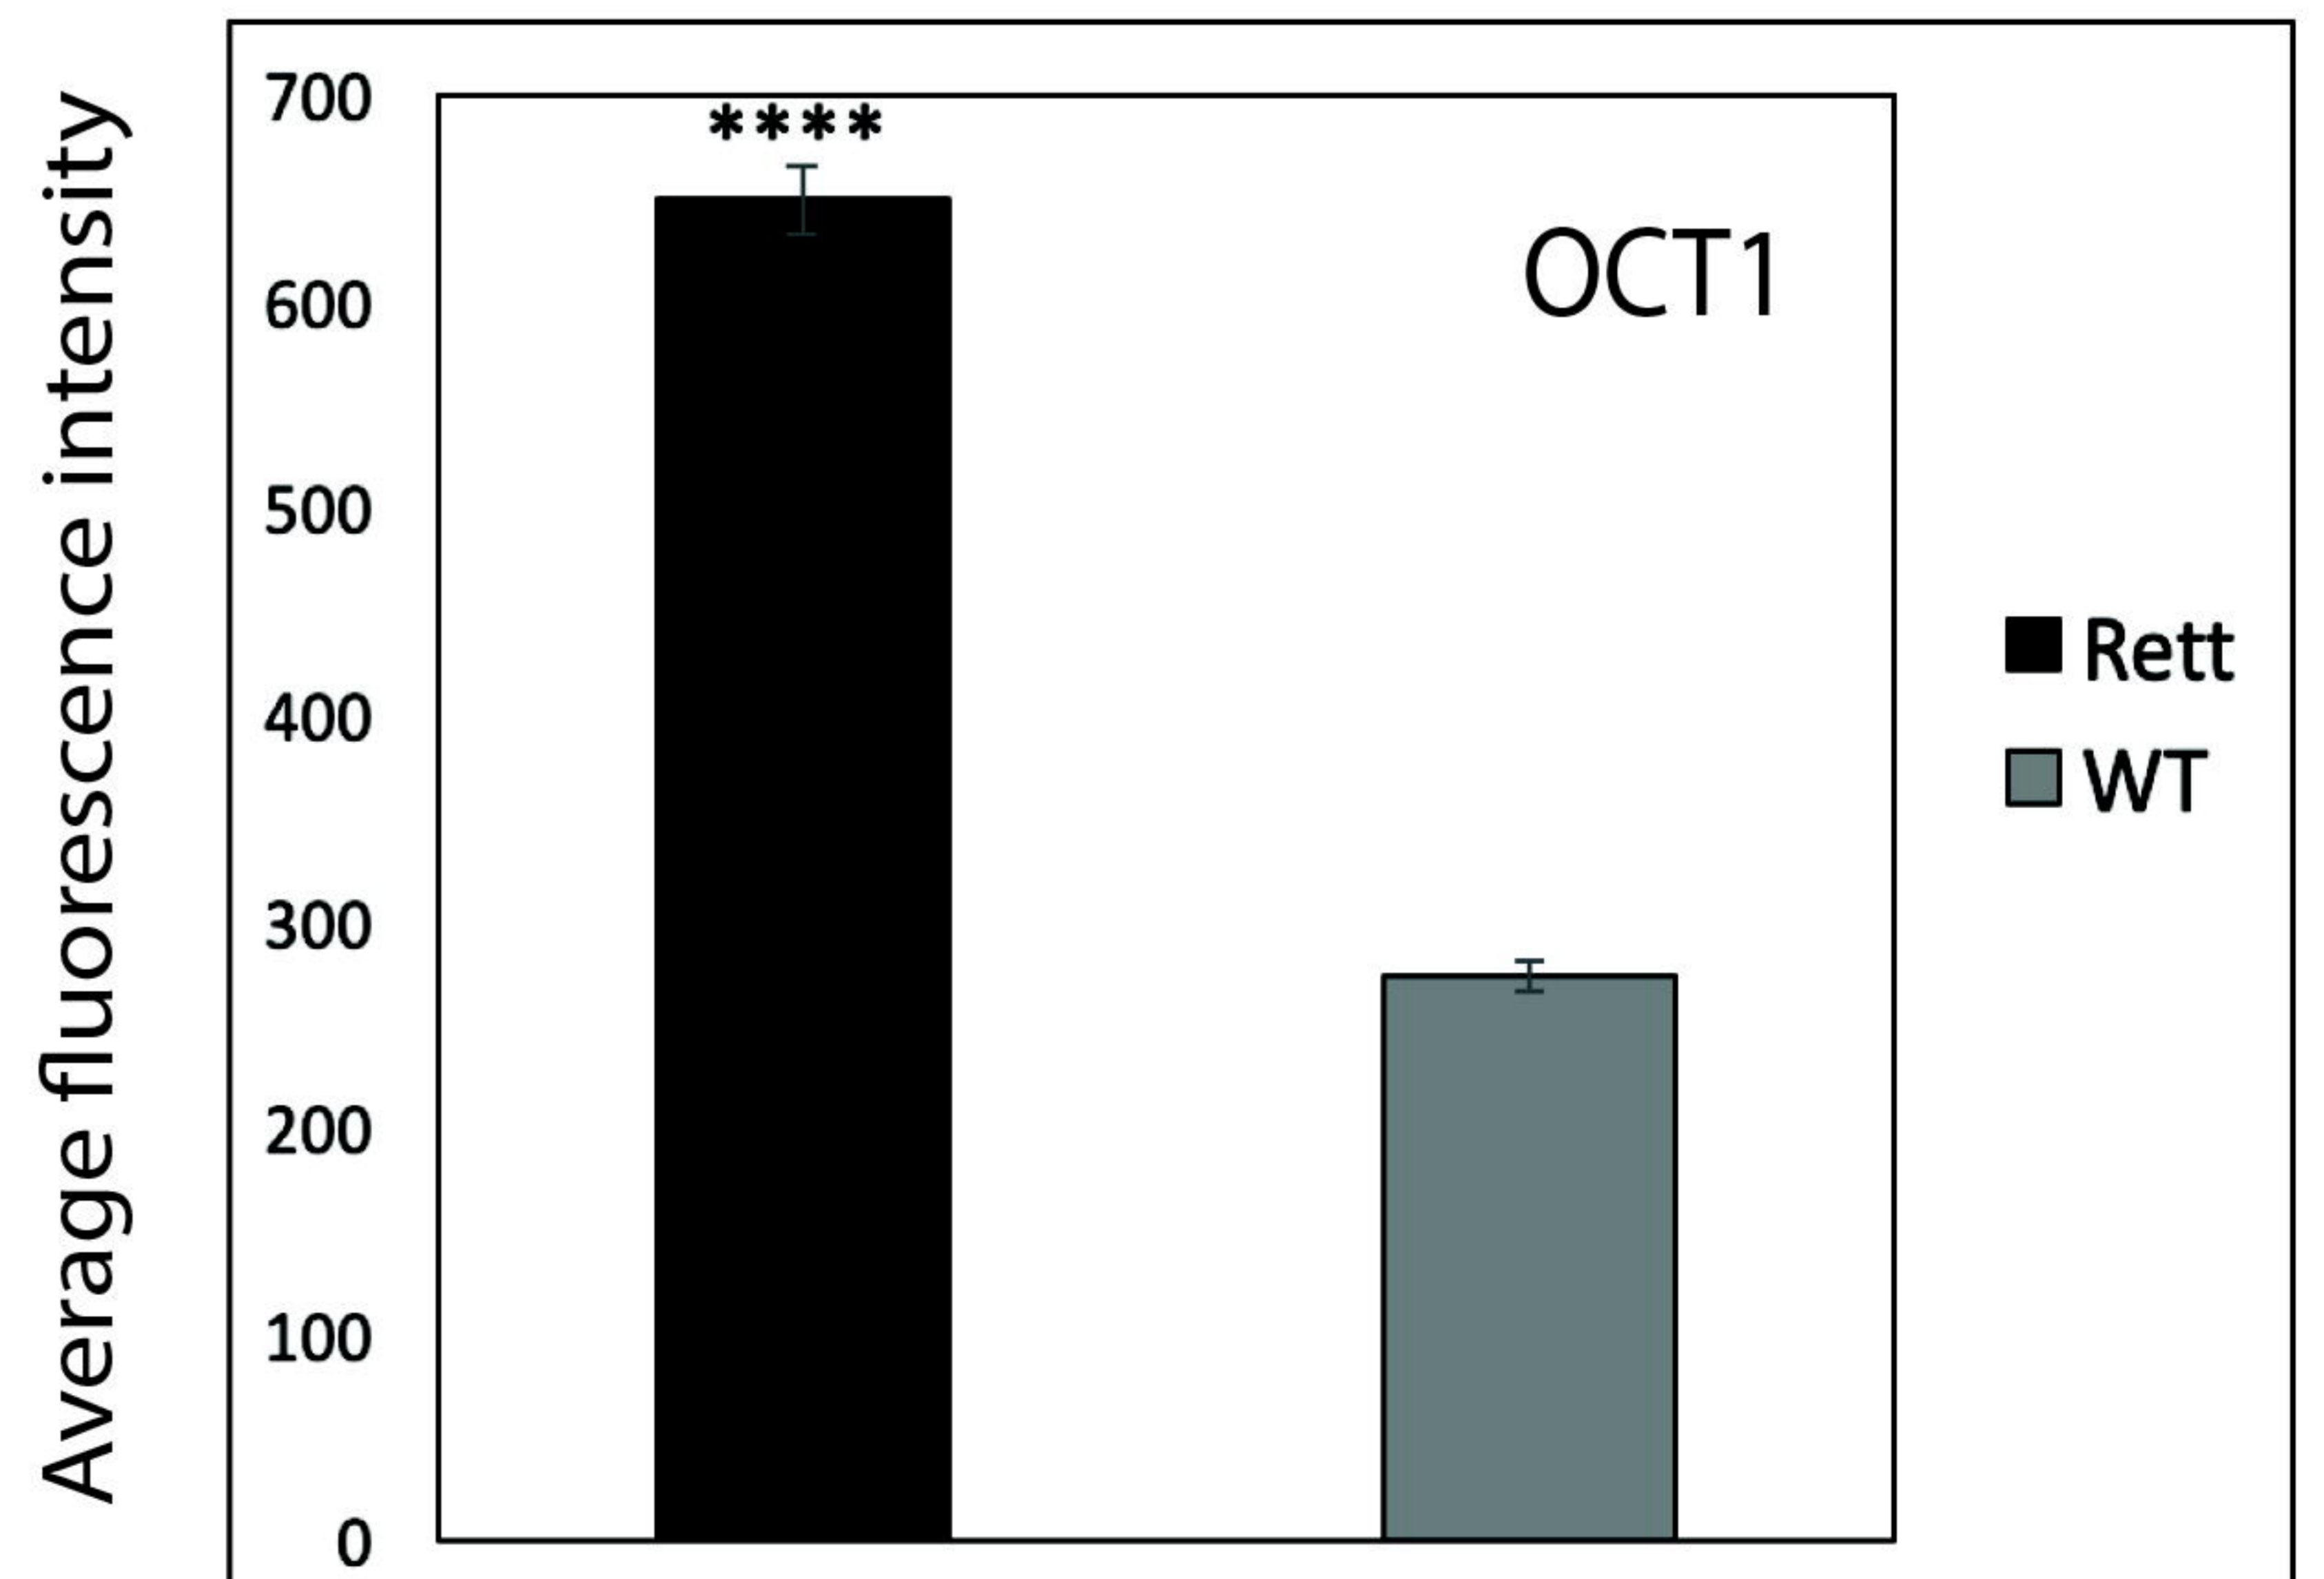

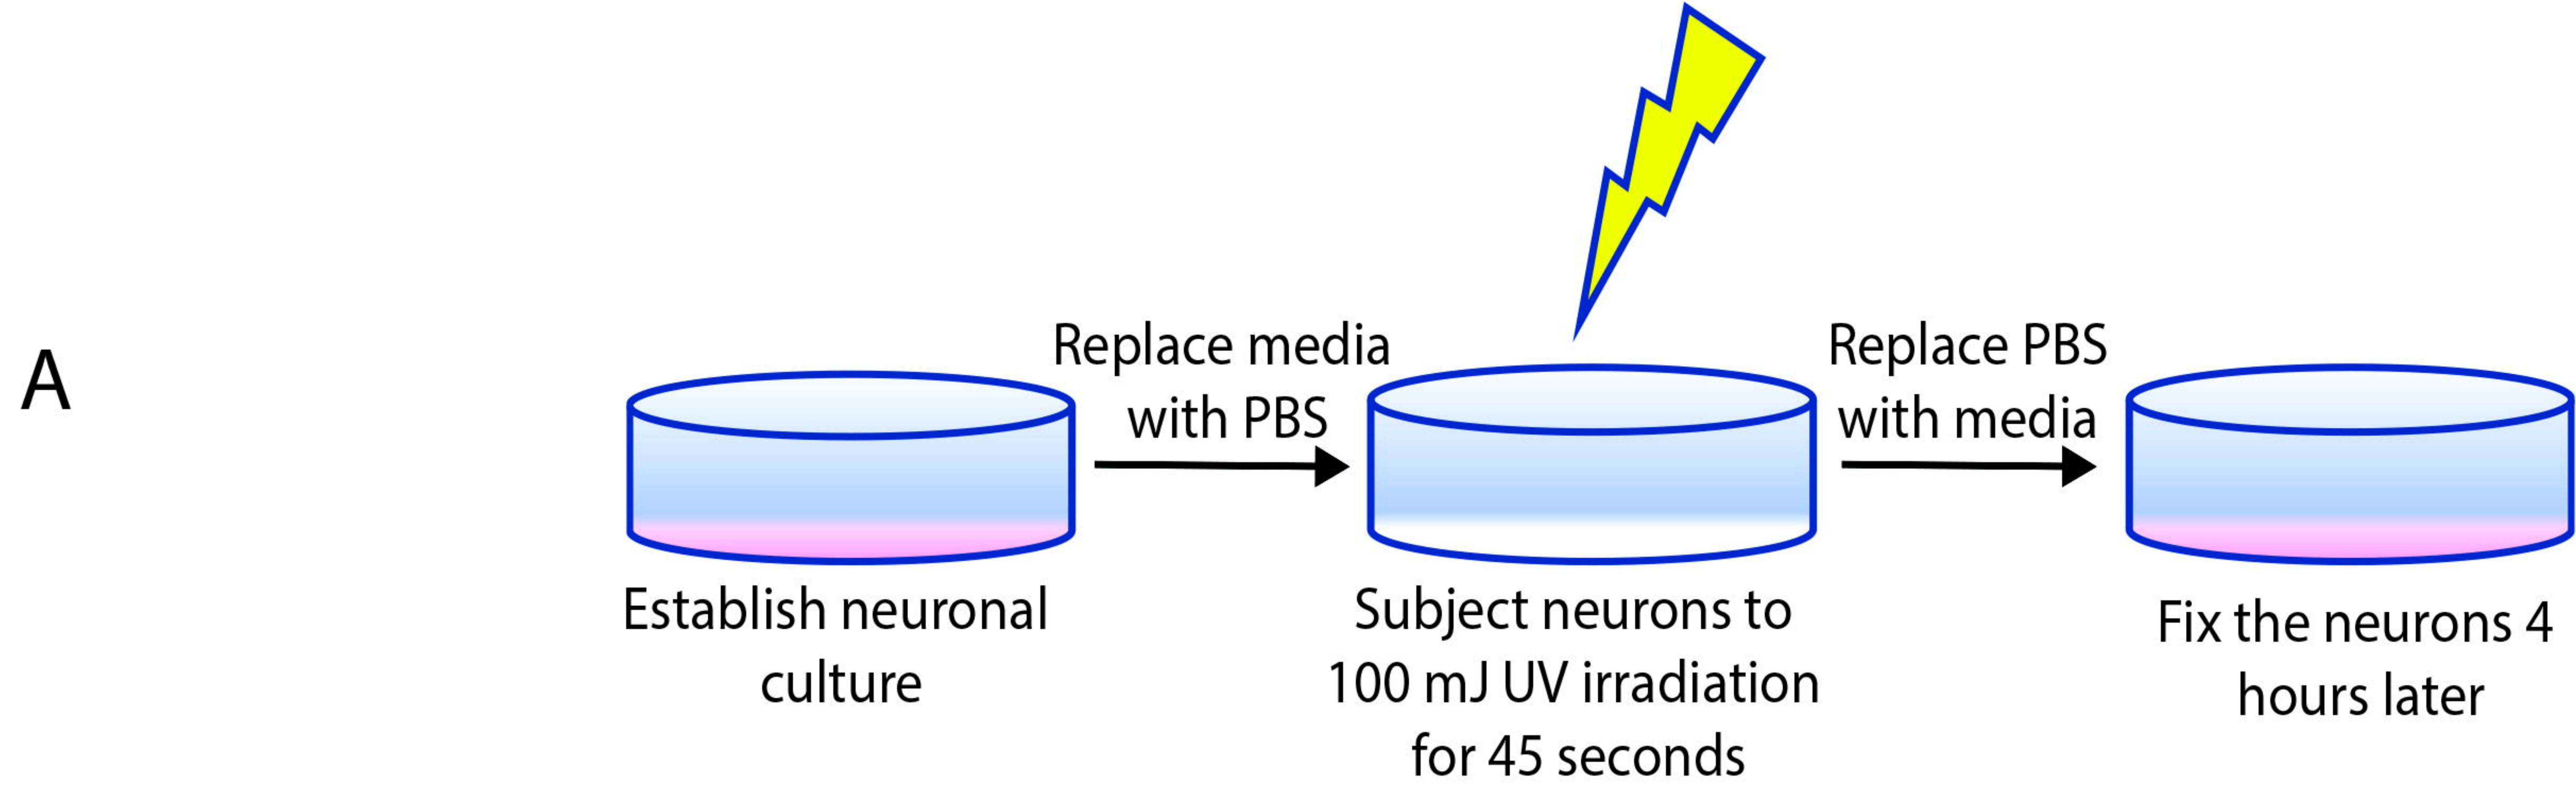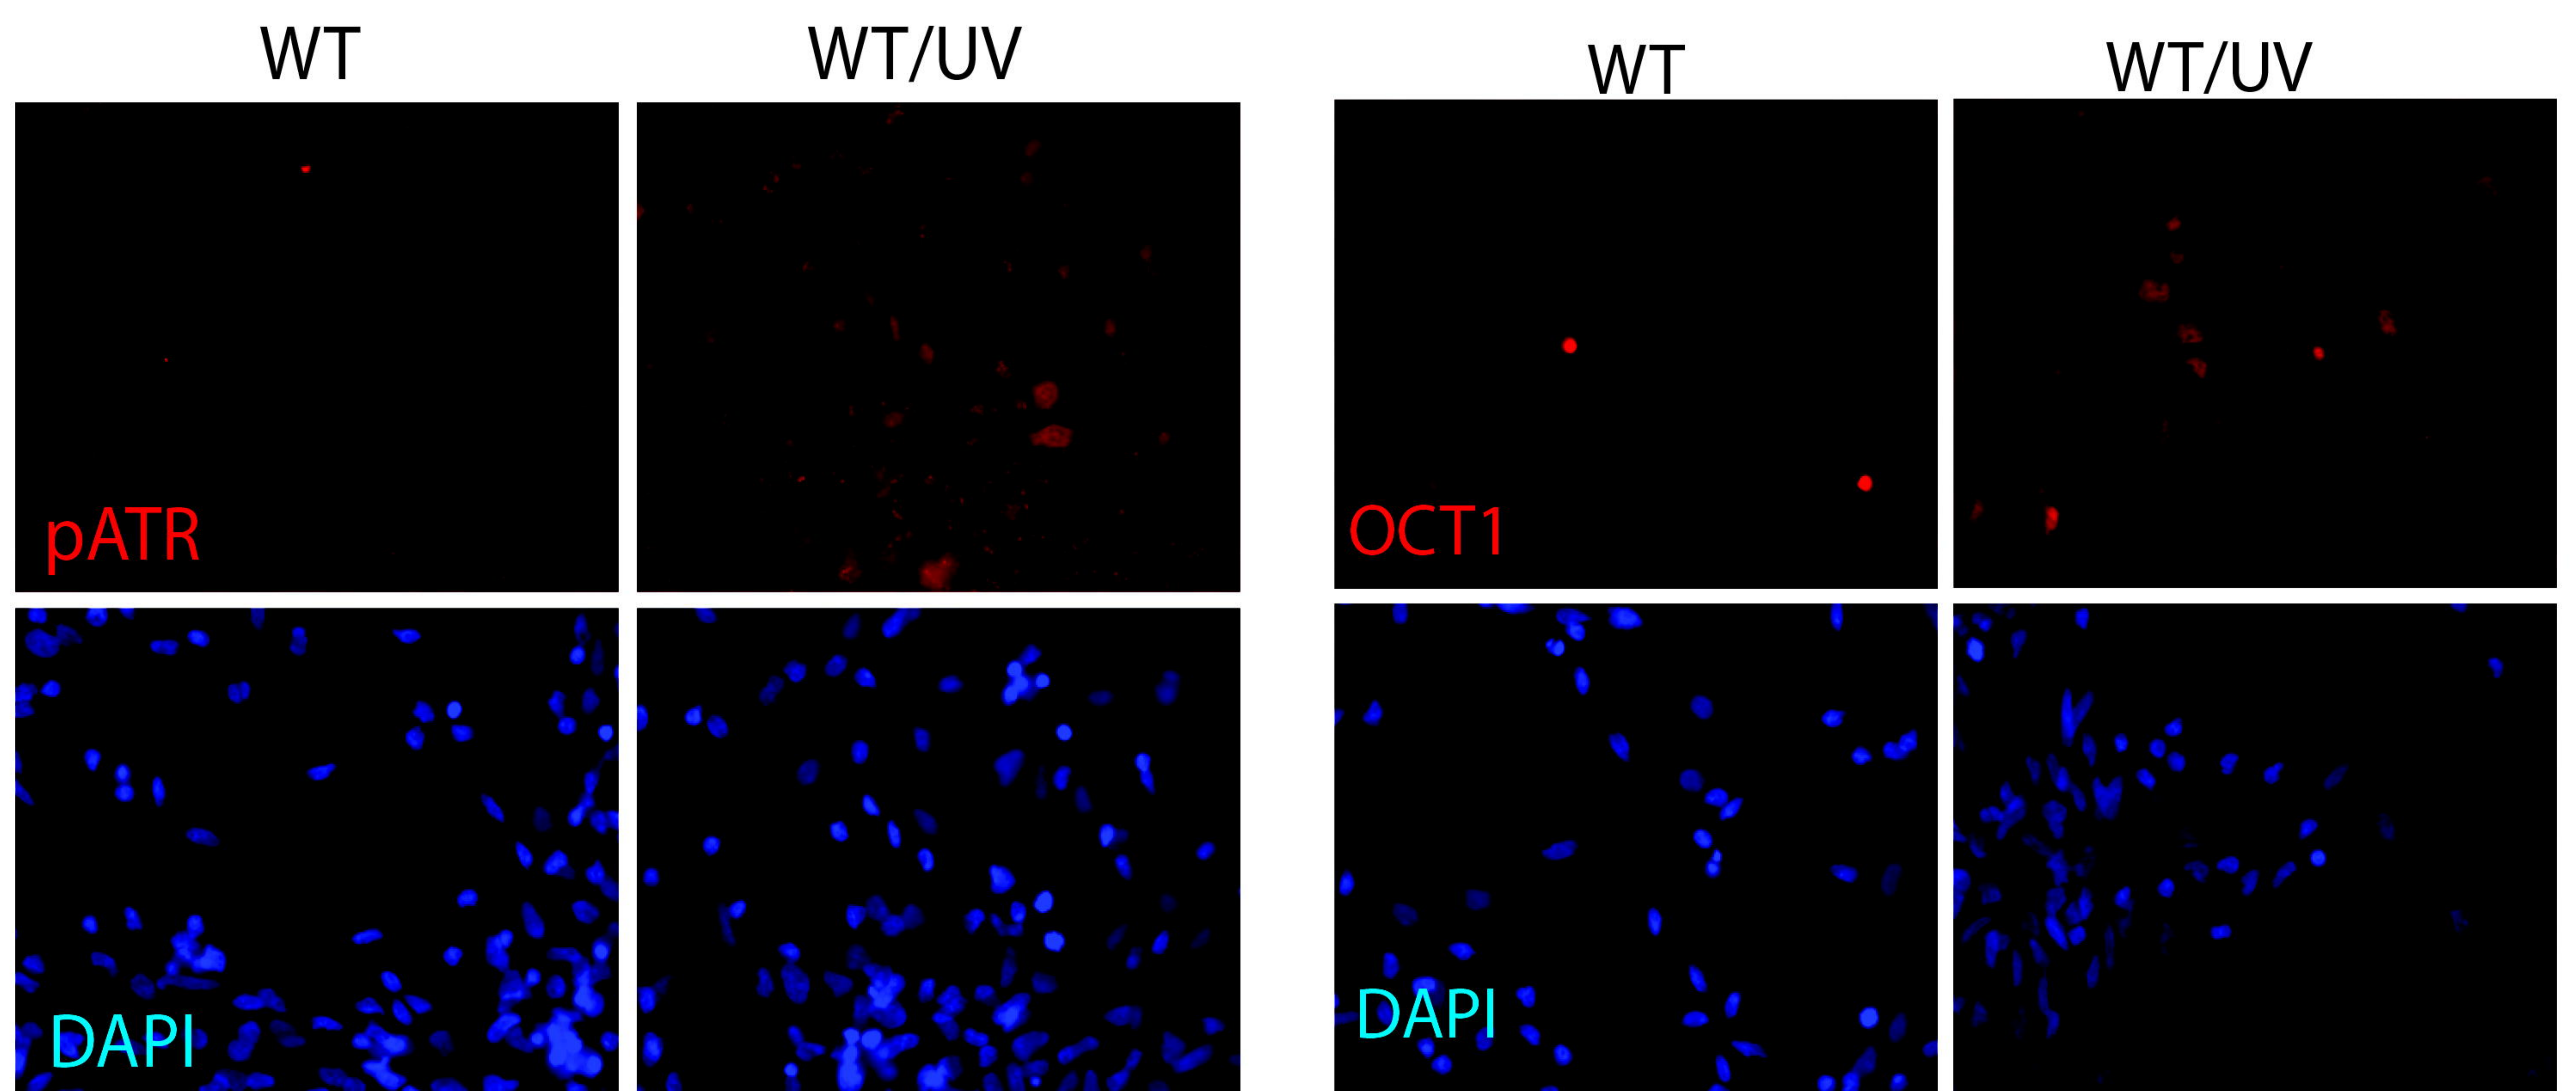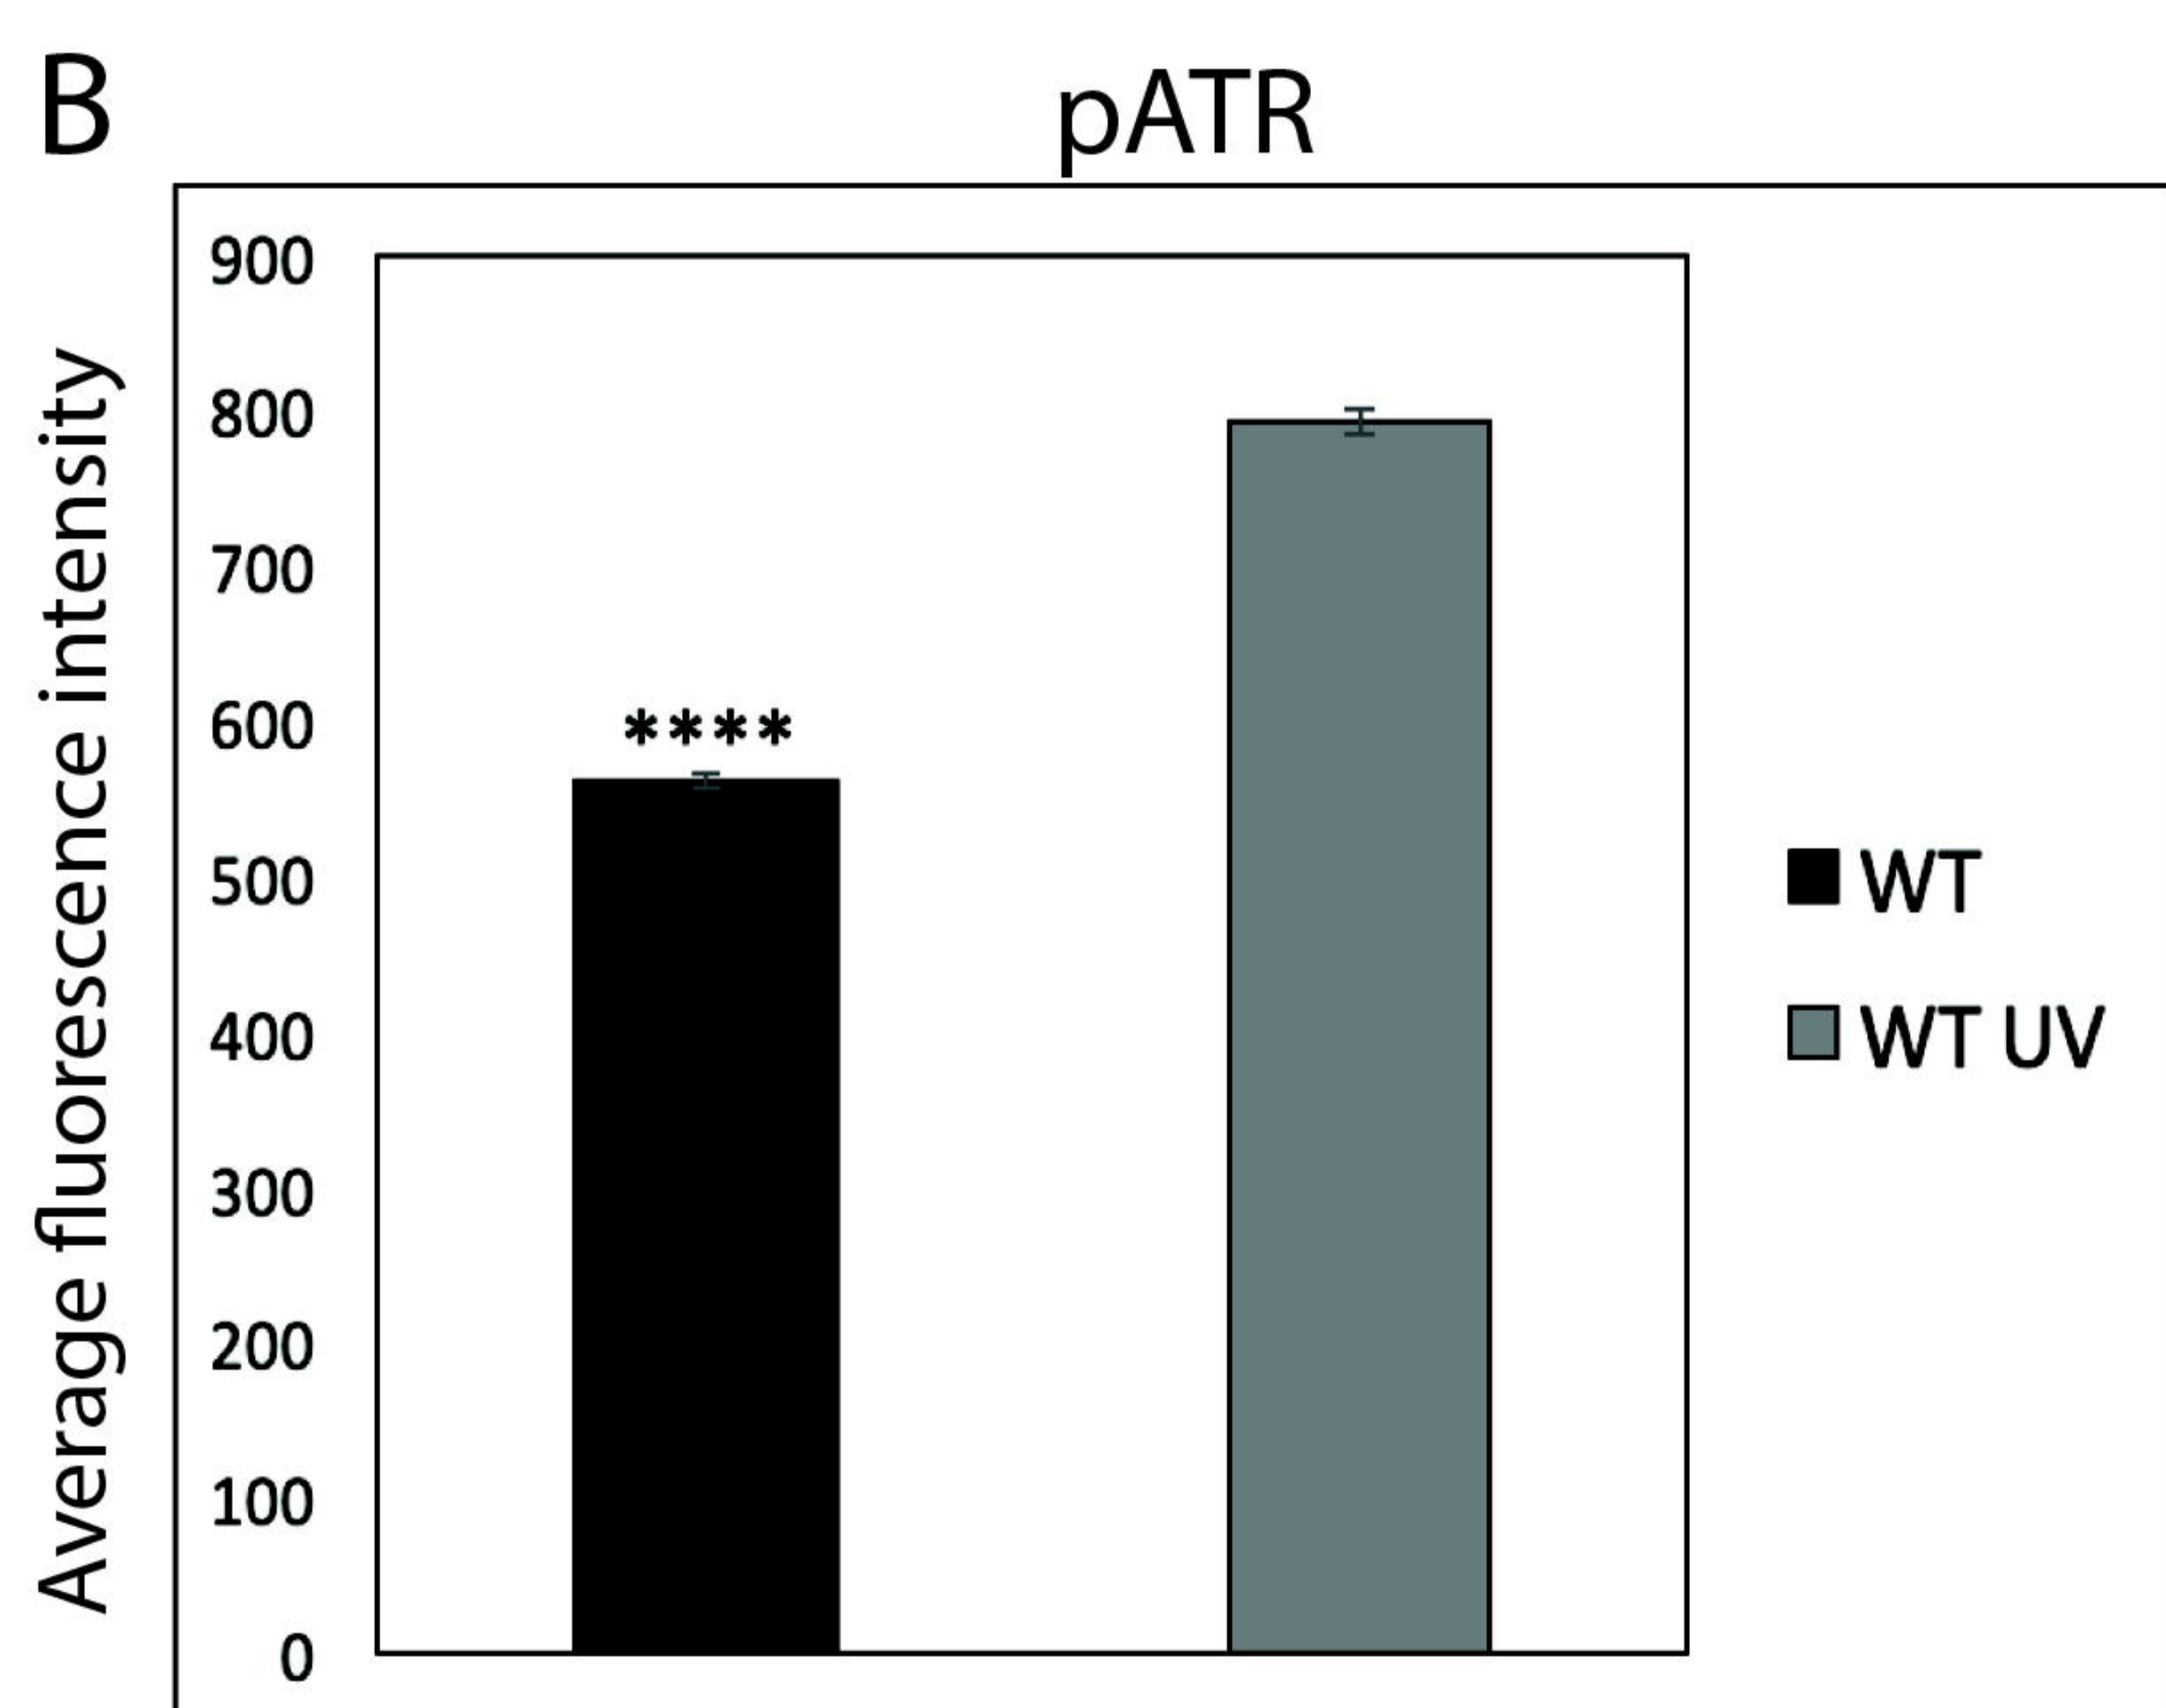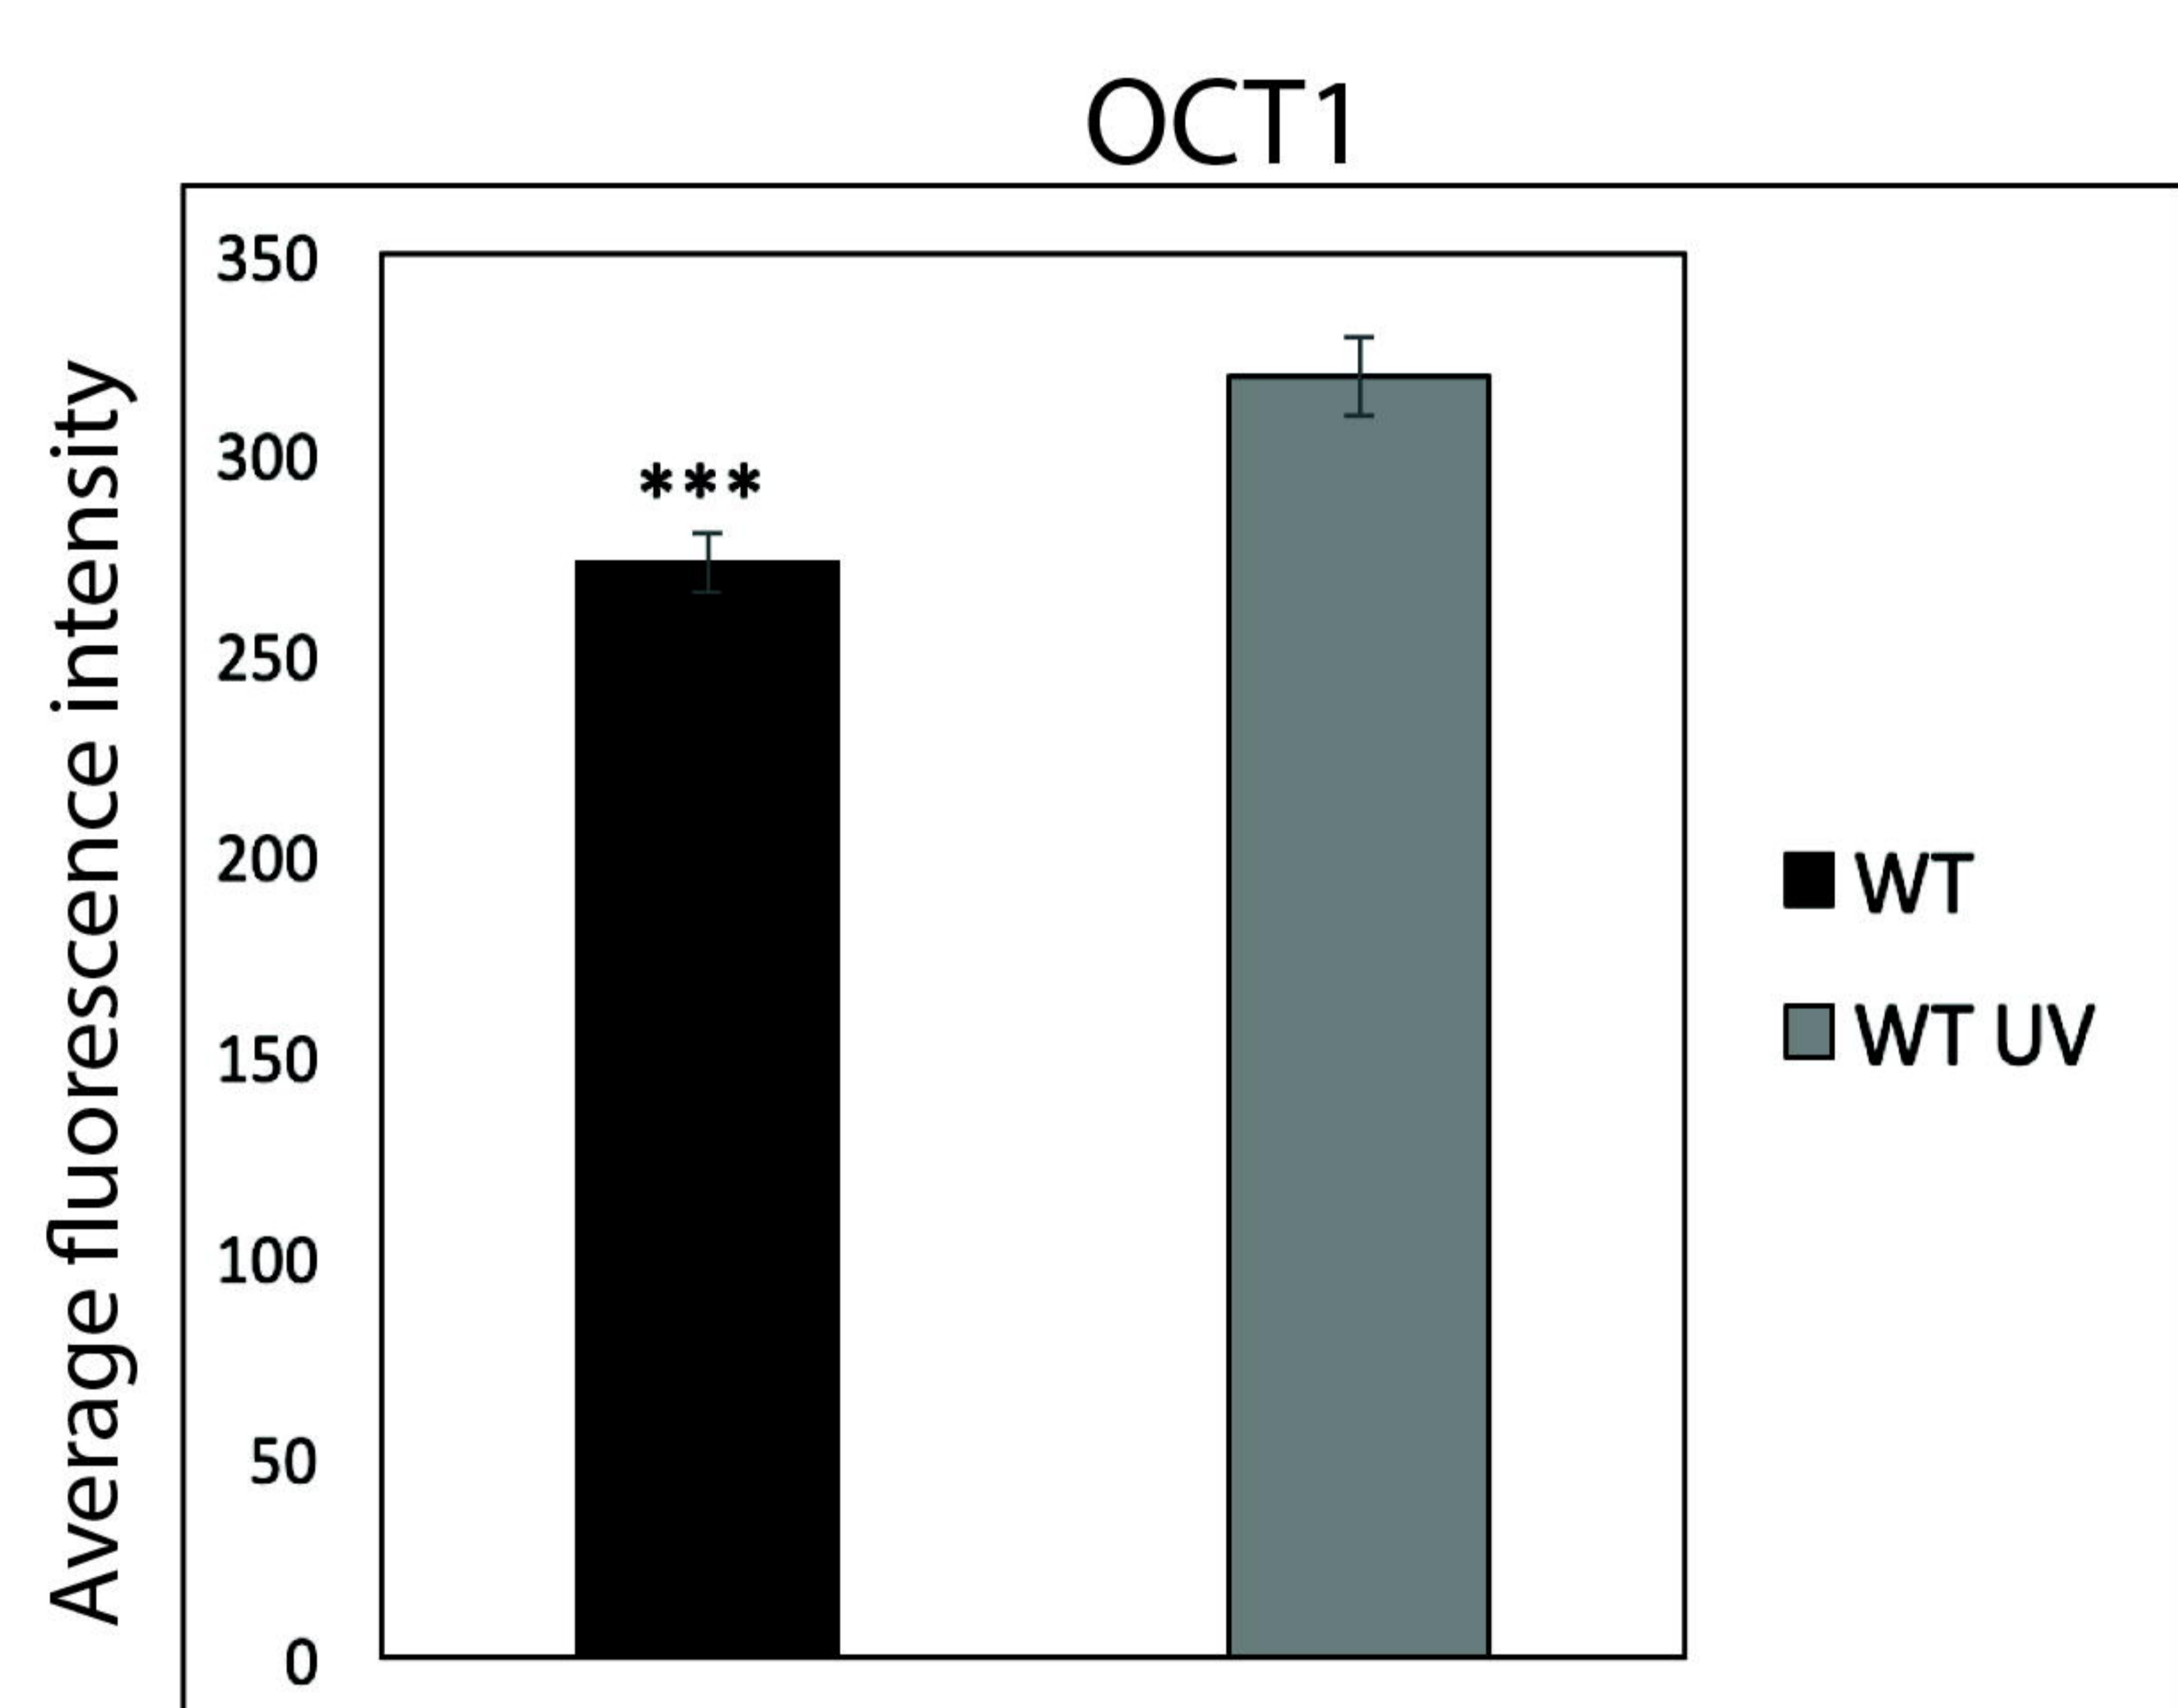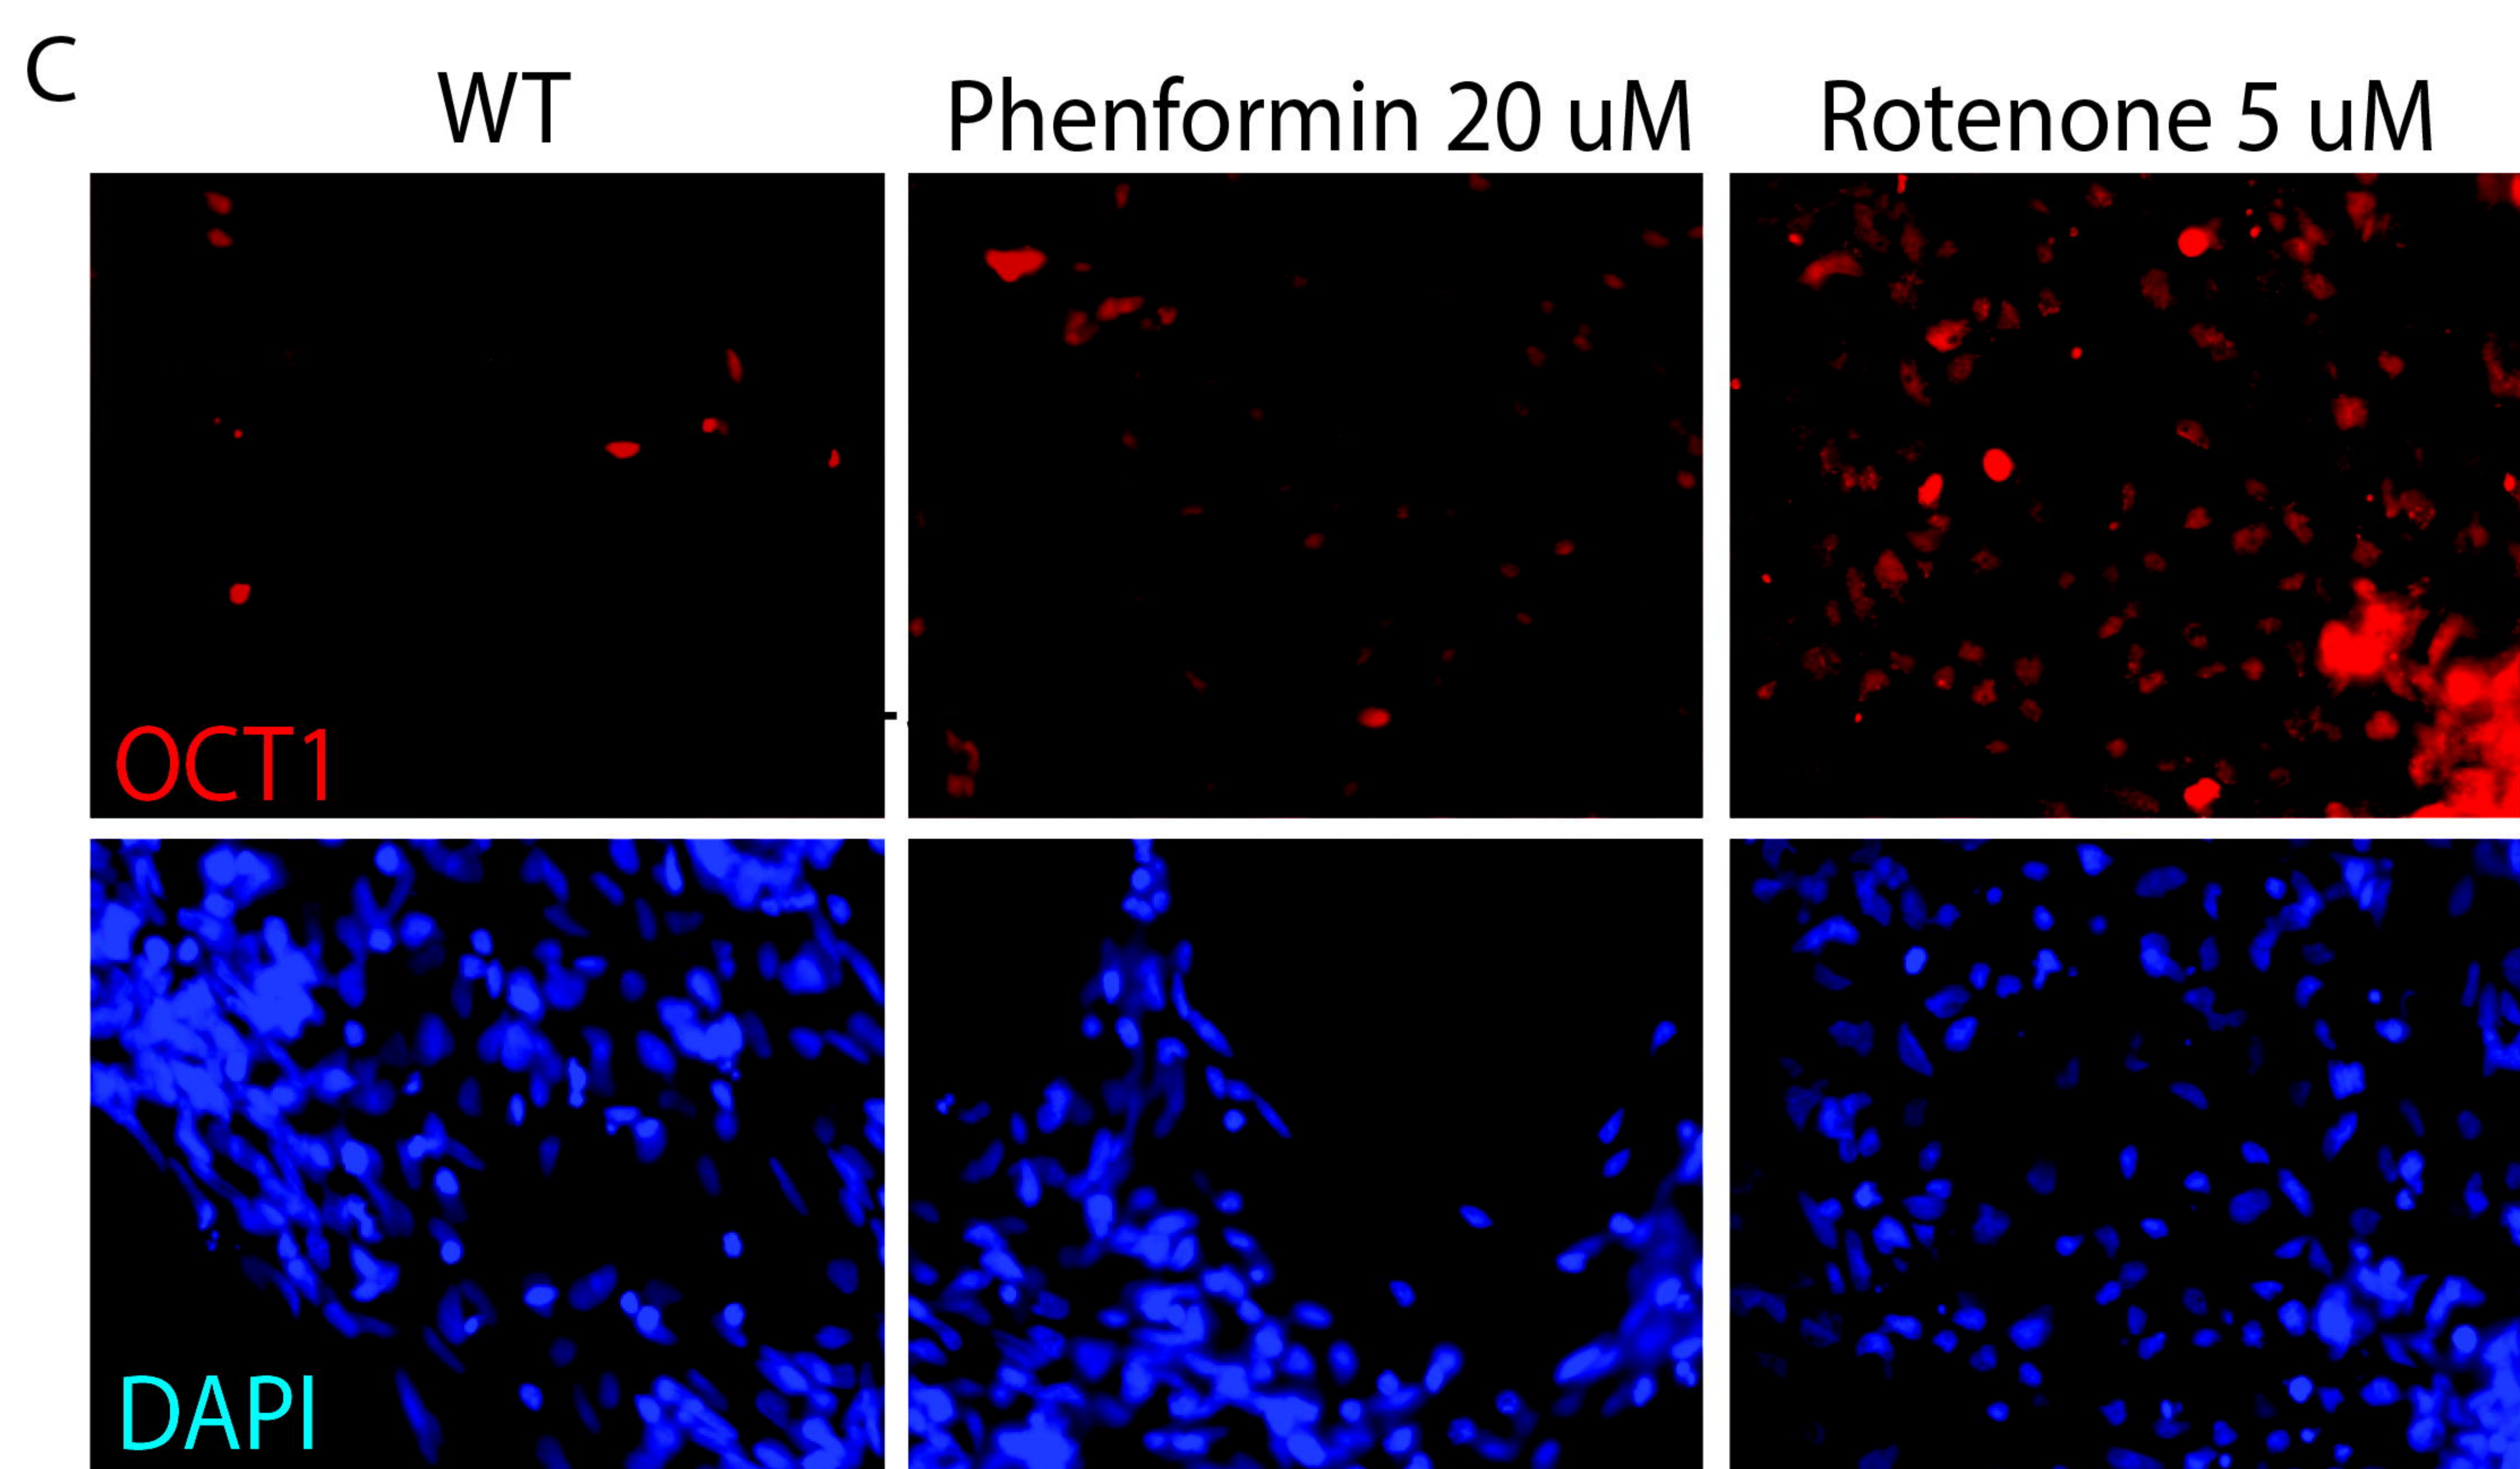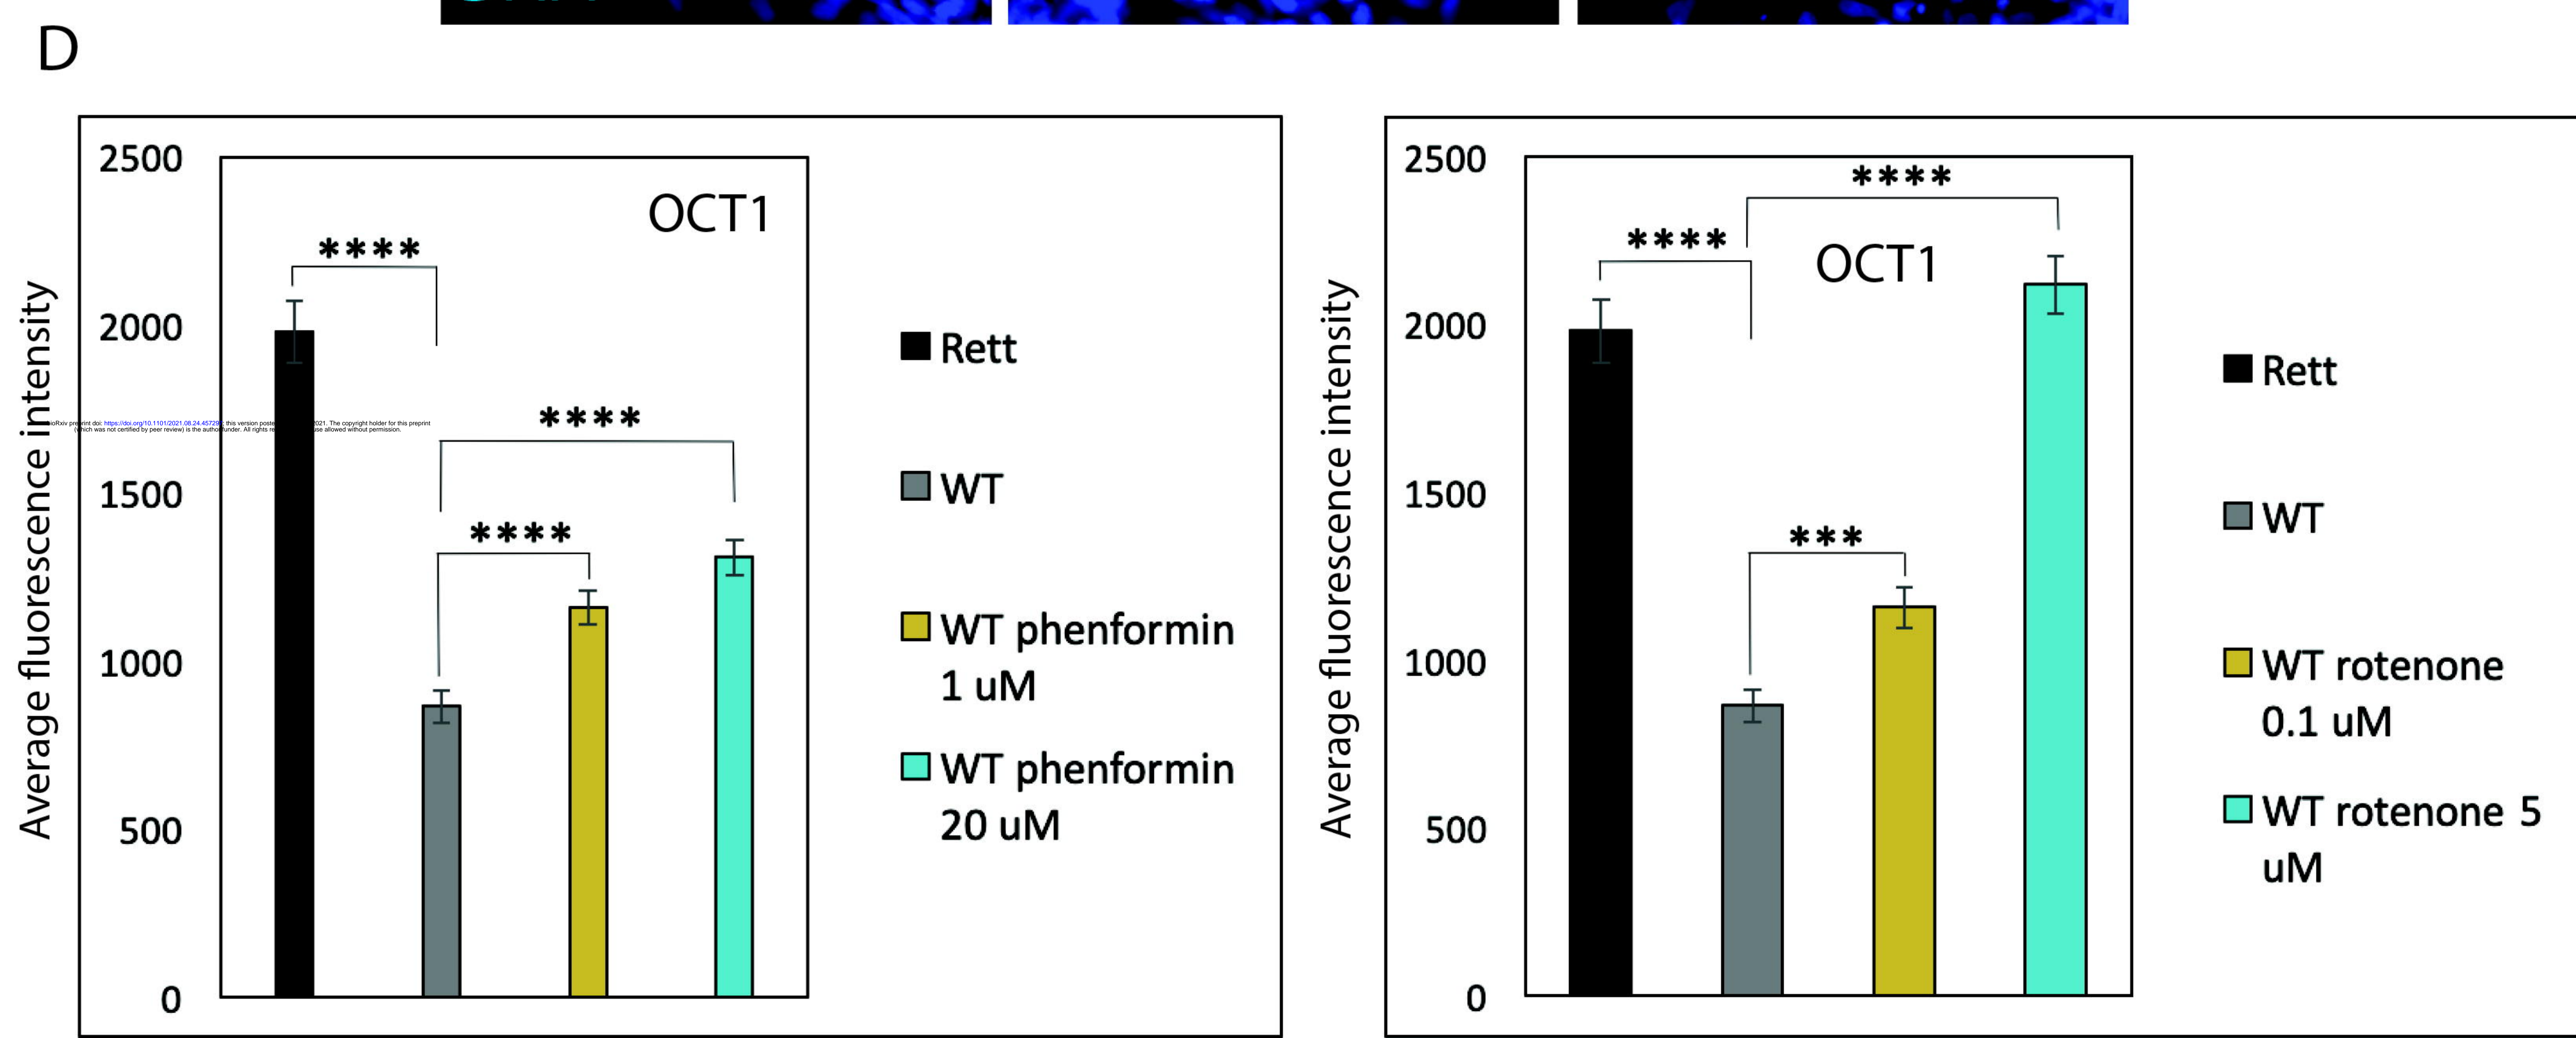

### A TCA metabolites incorporation

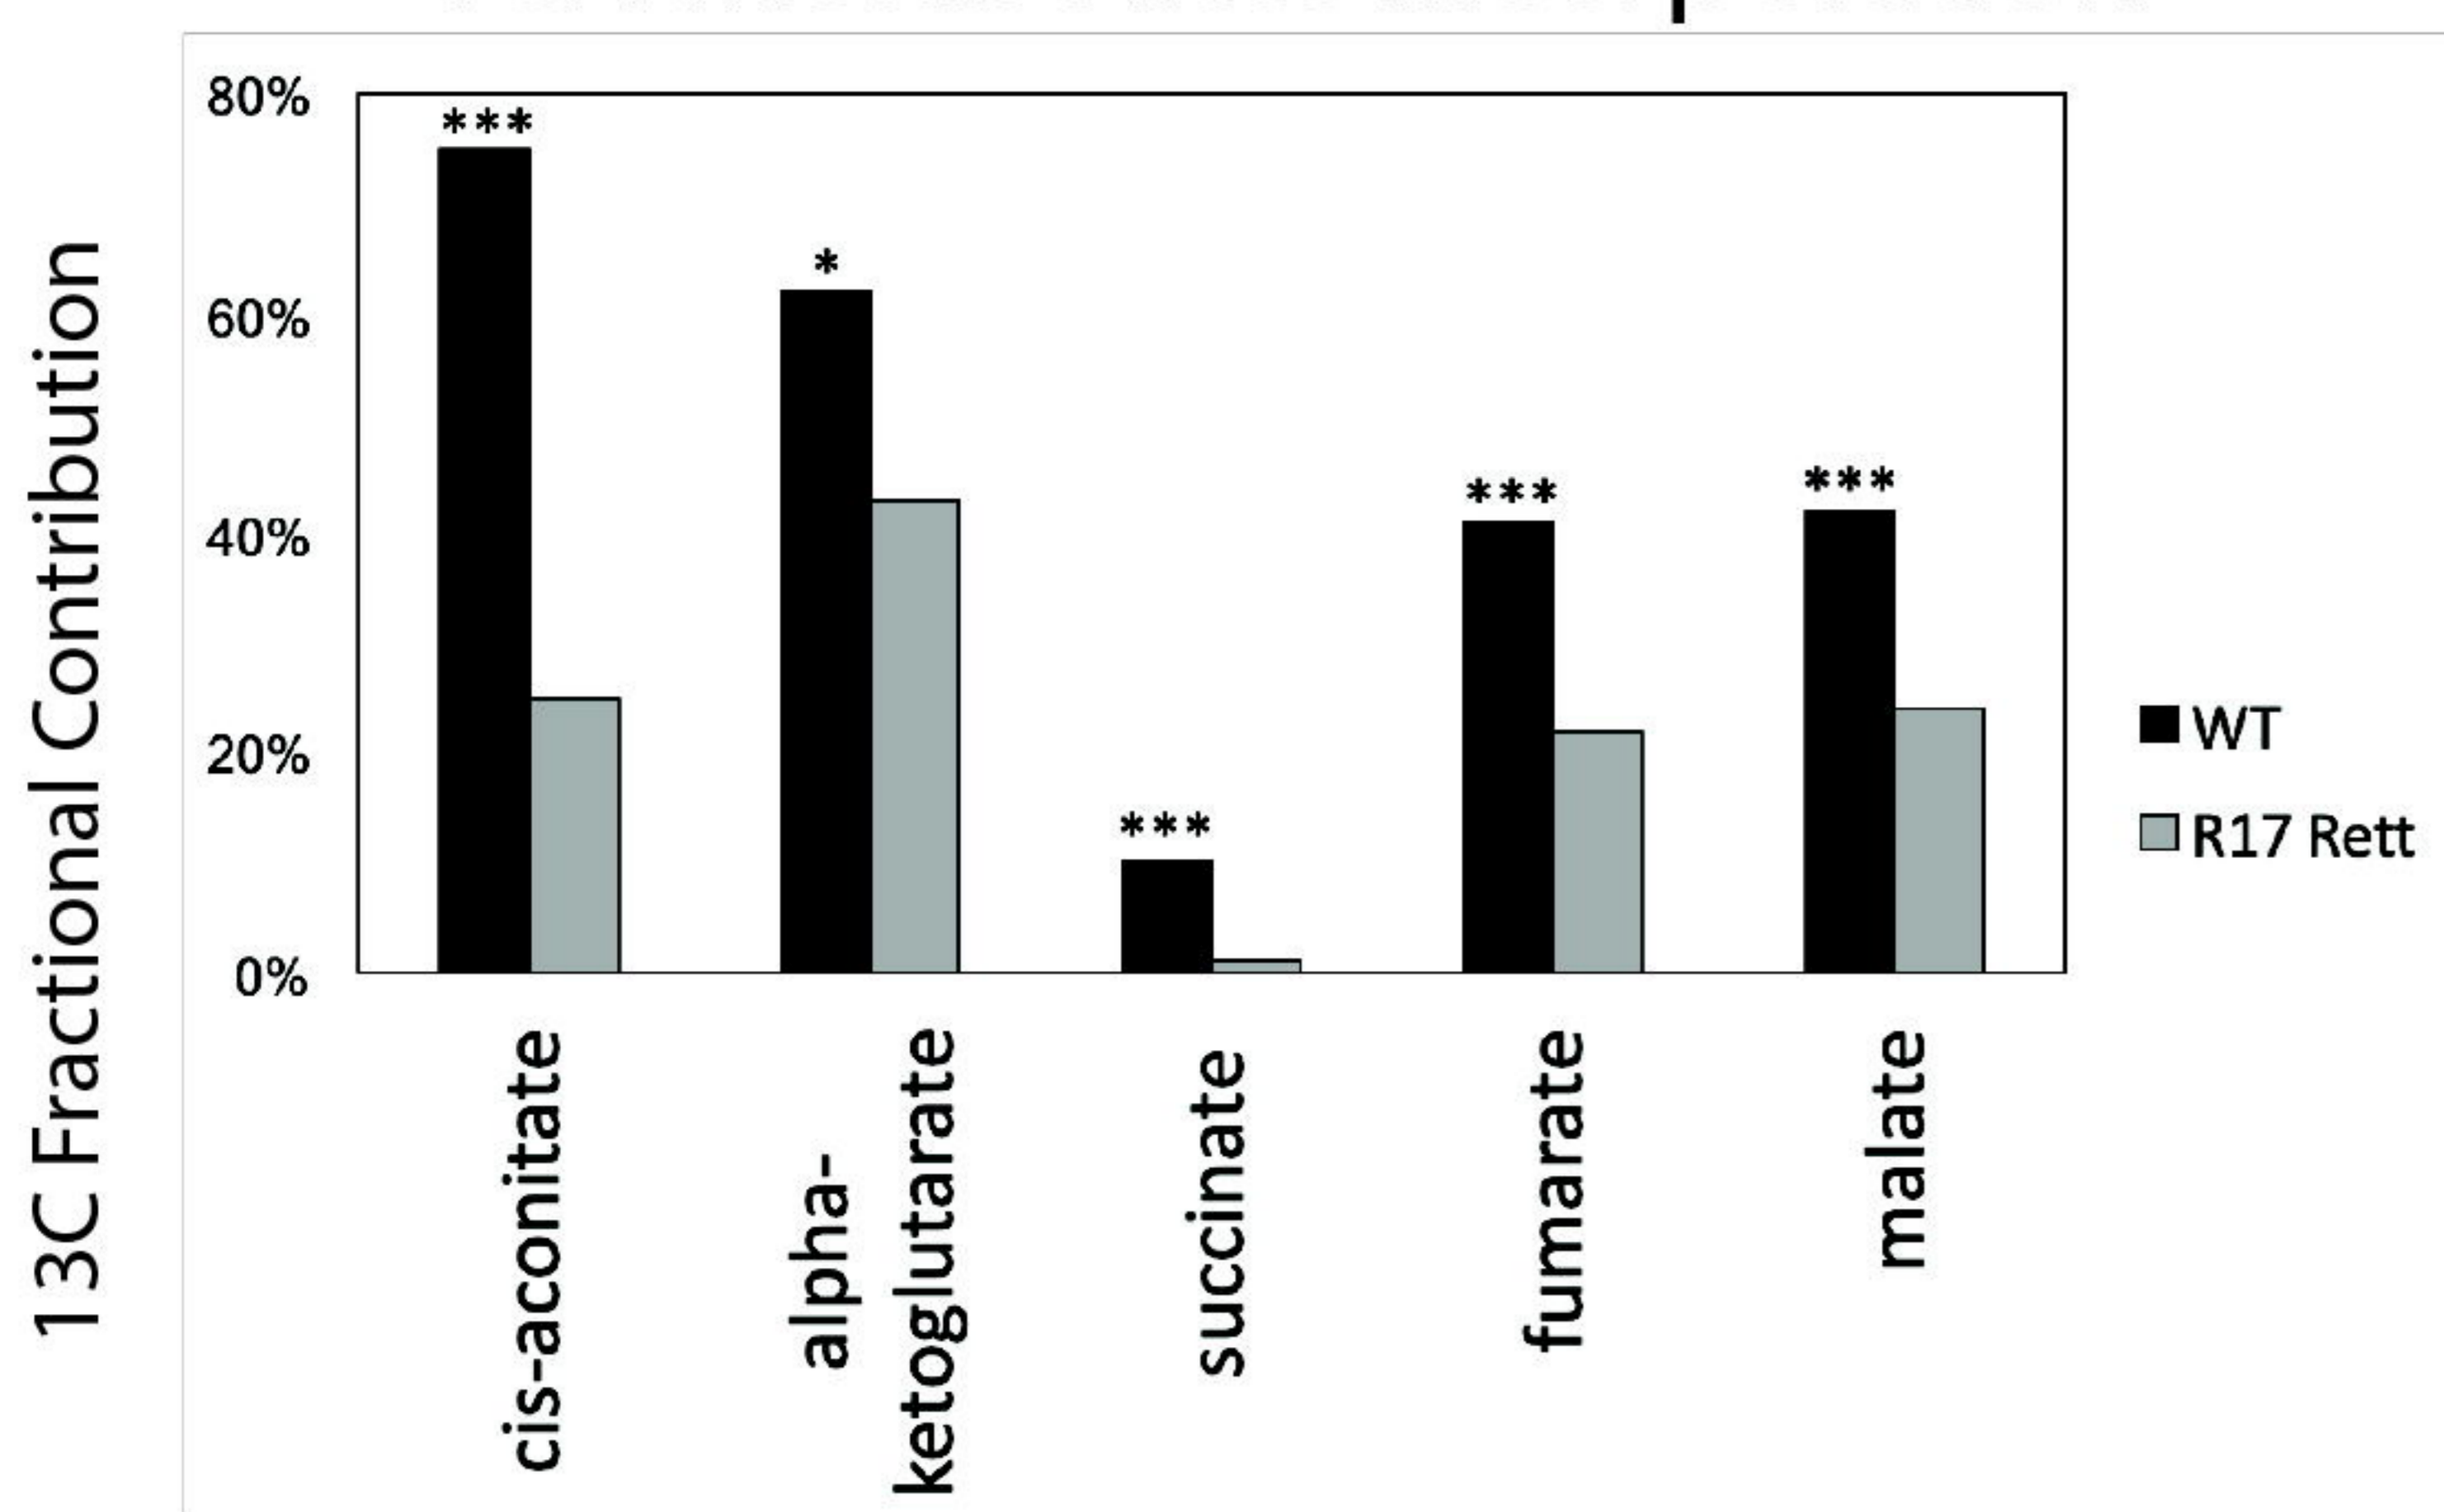

### TCA metabolites incorporation

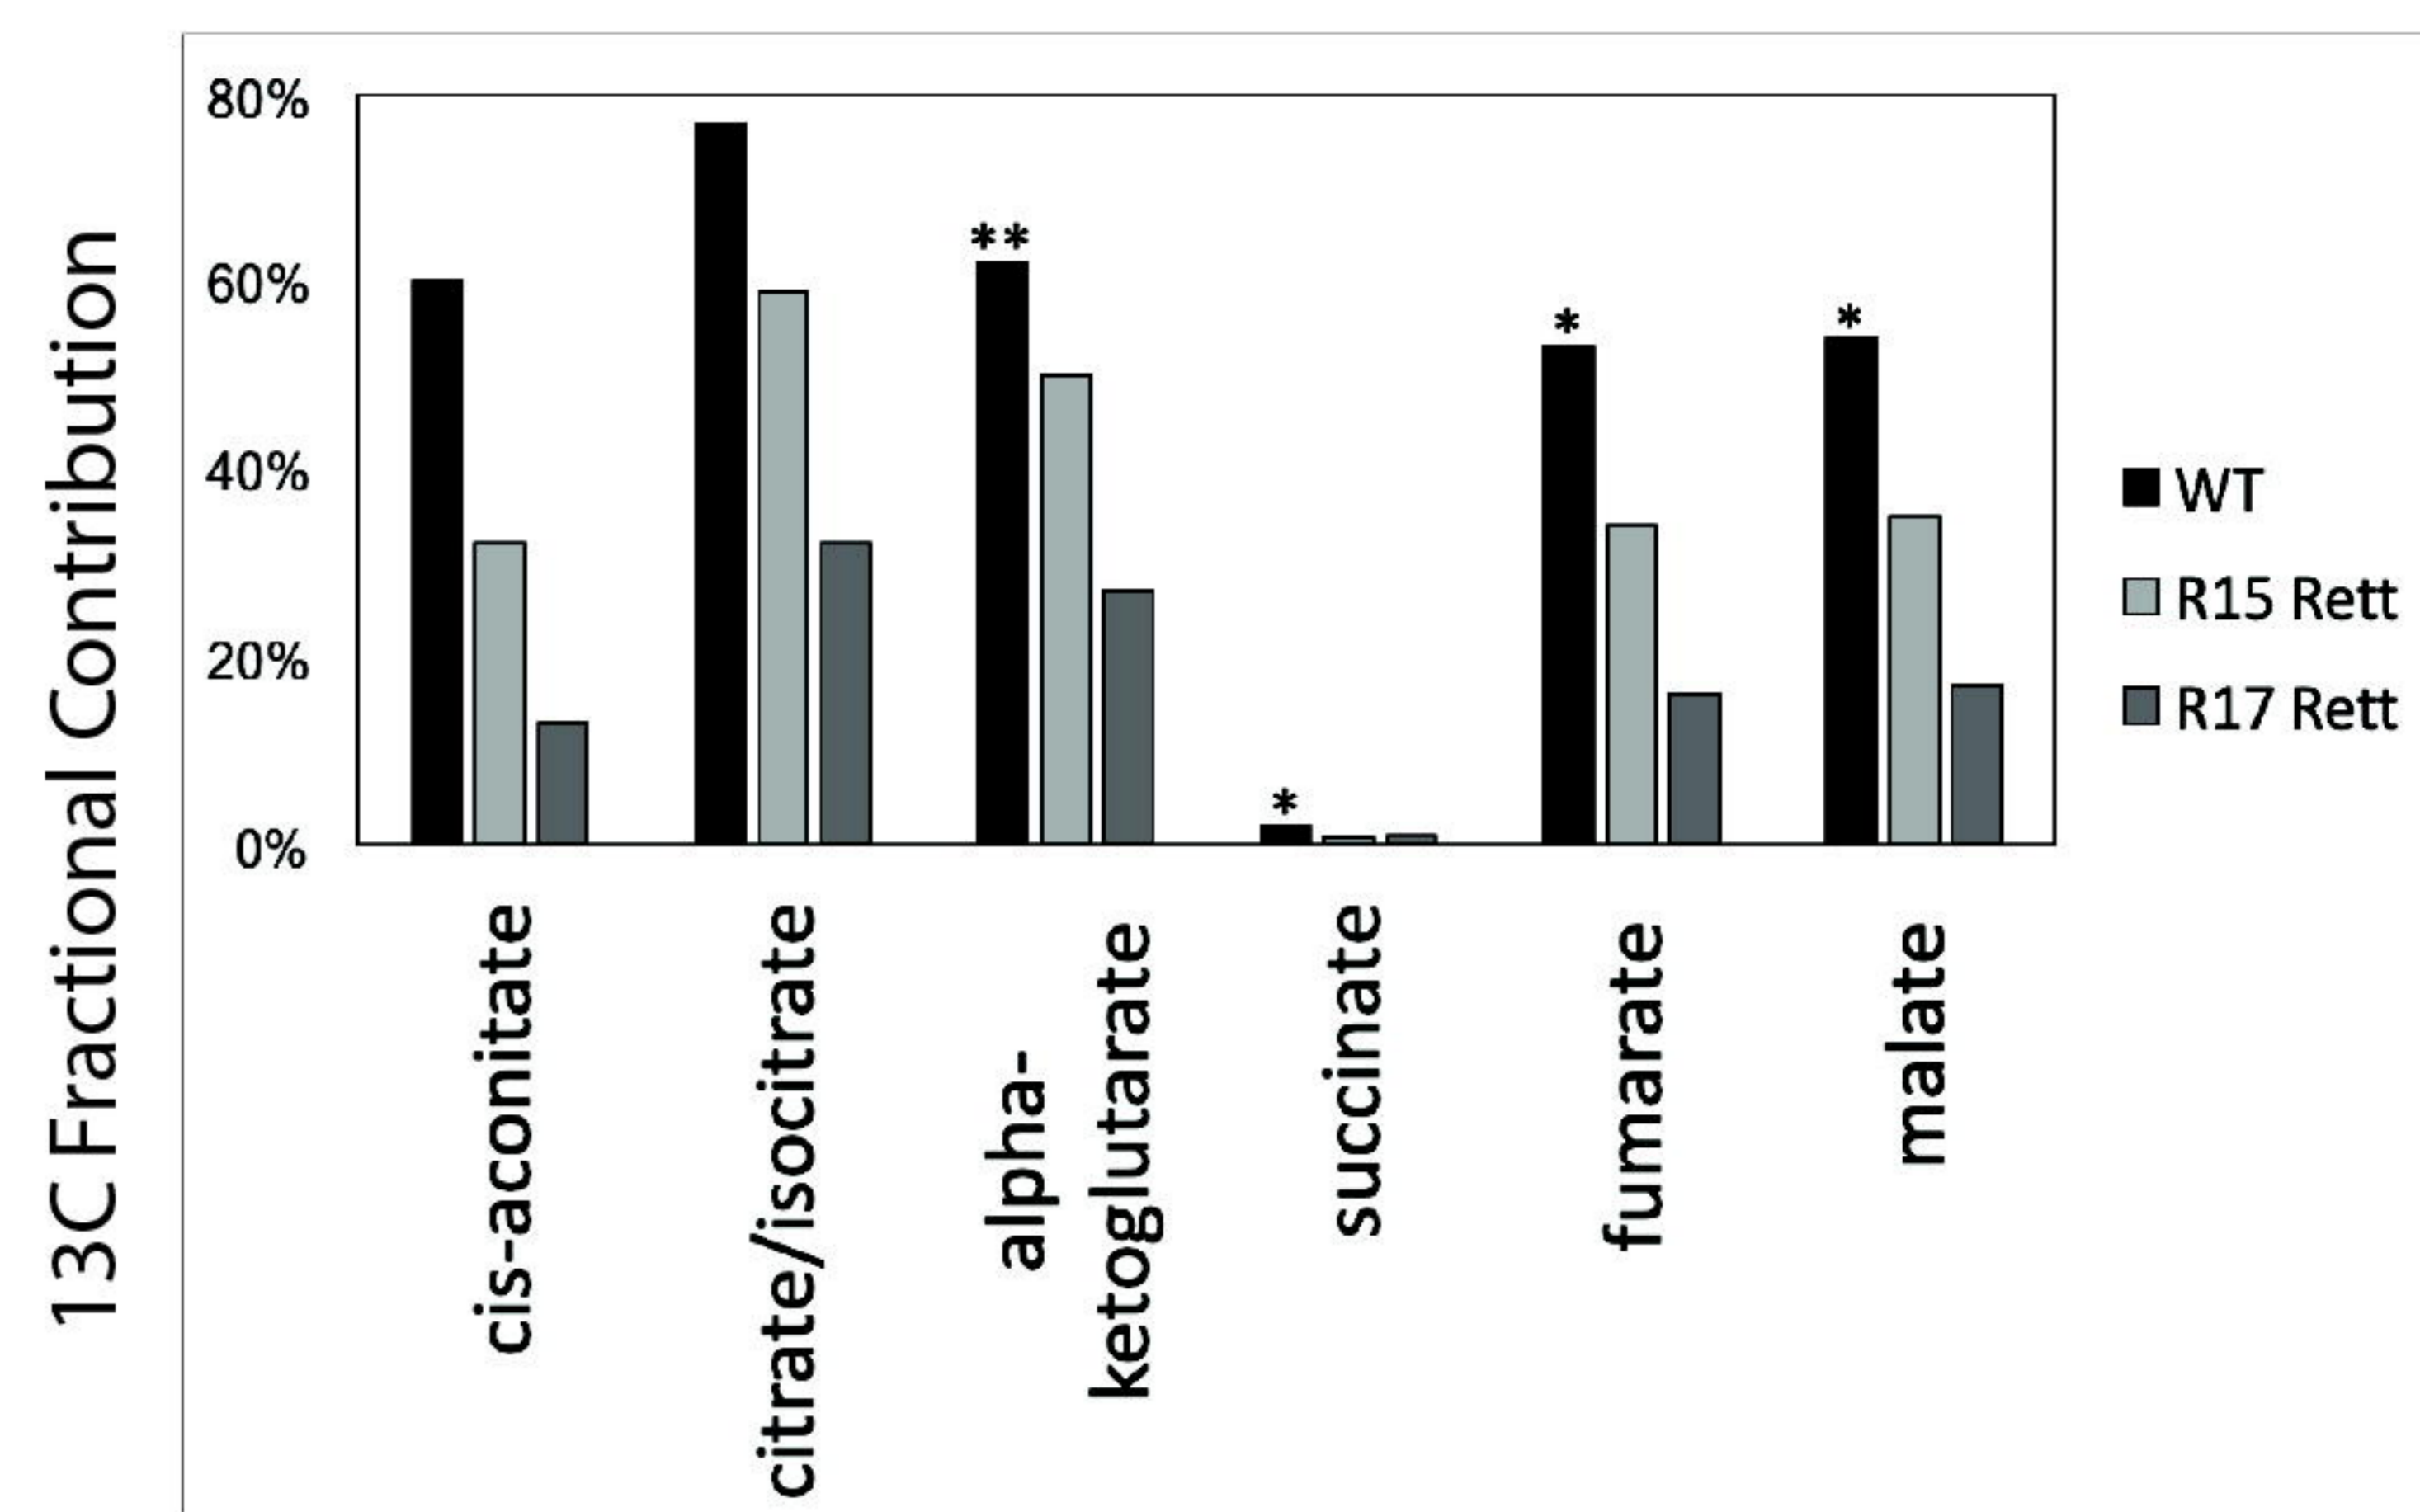

### B Metabolic pathway enrichment

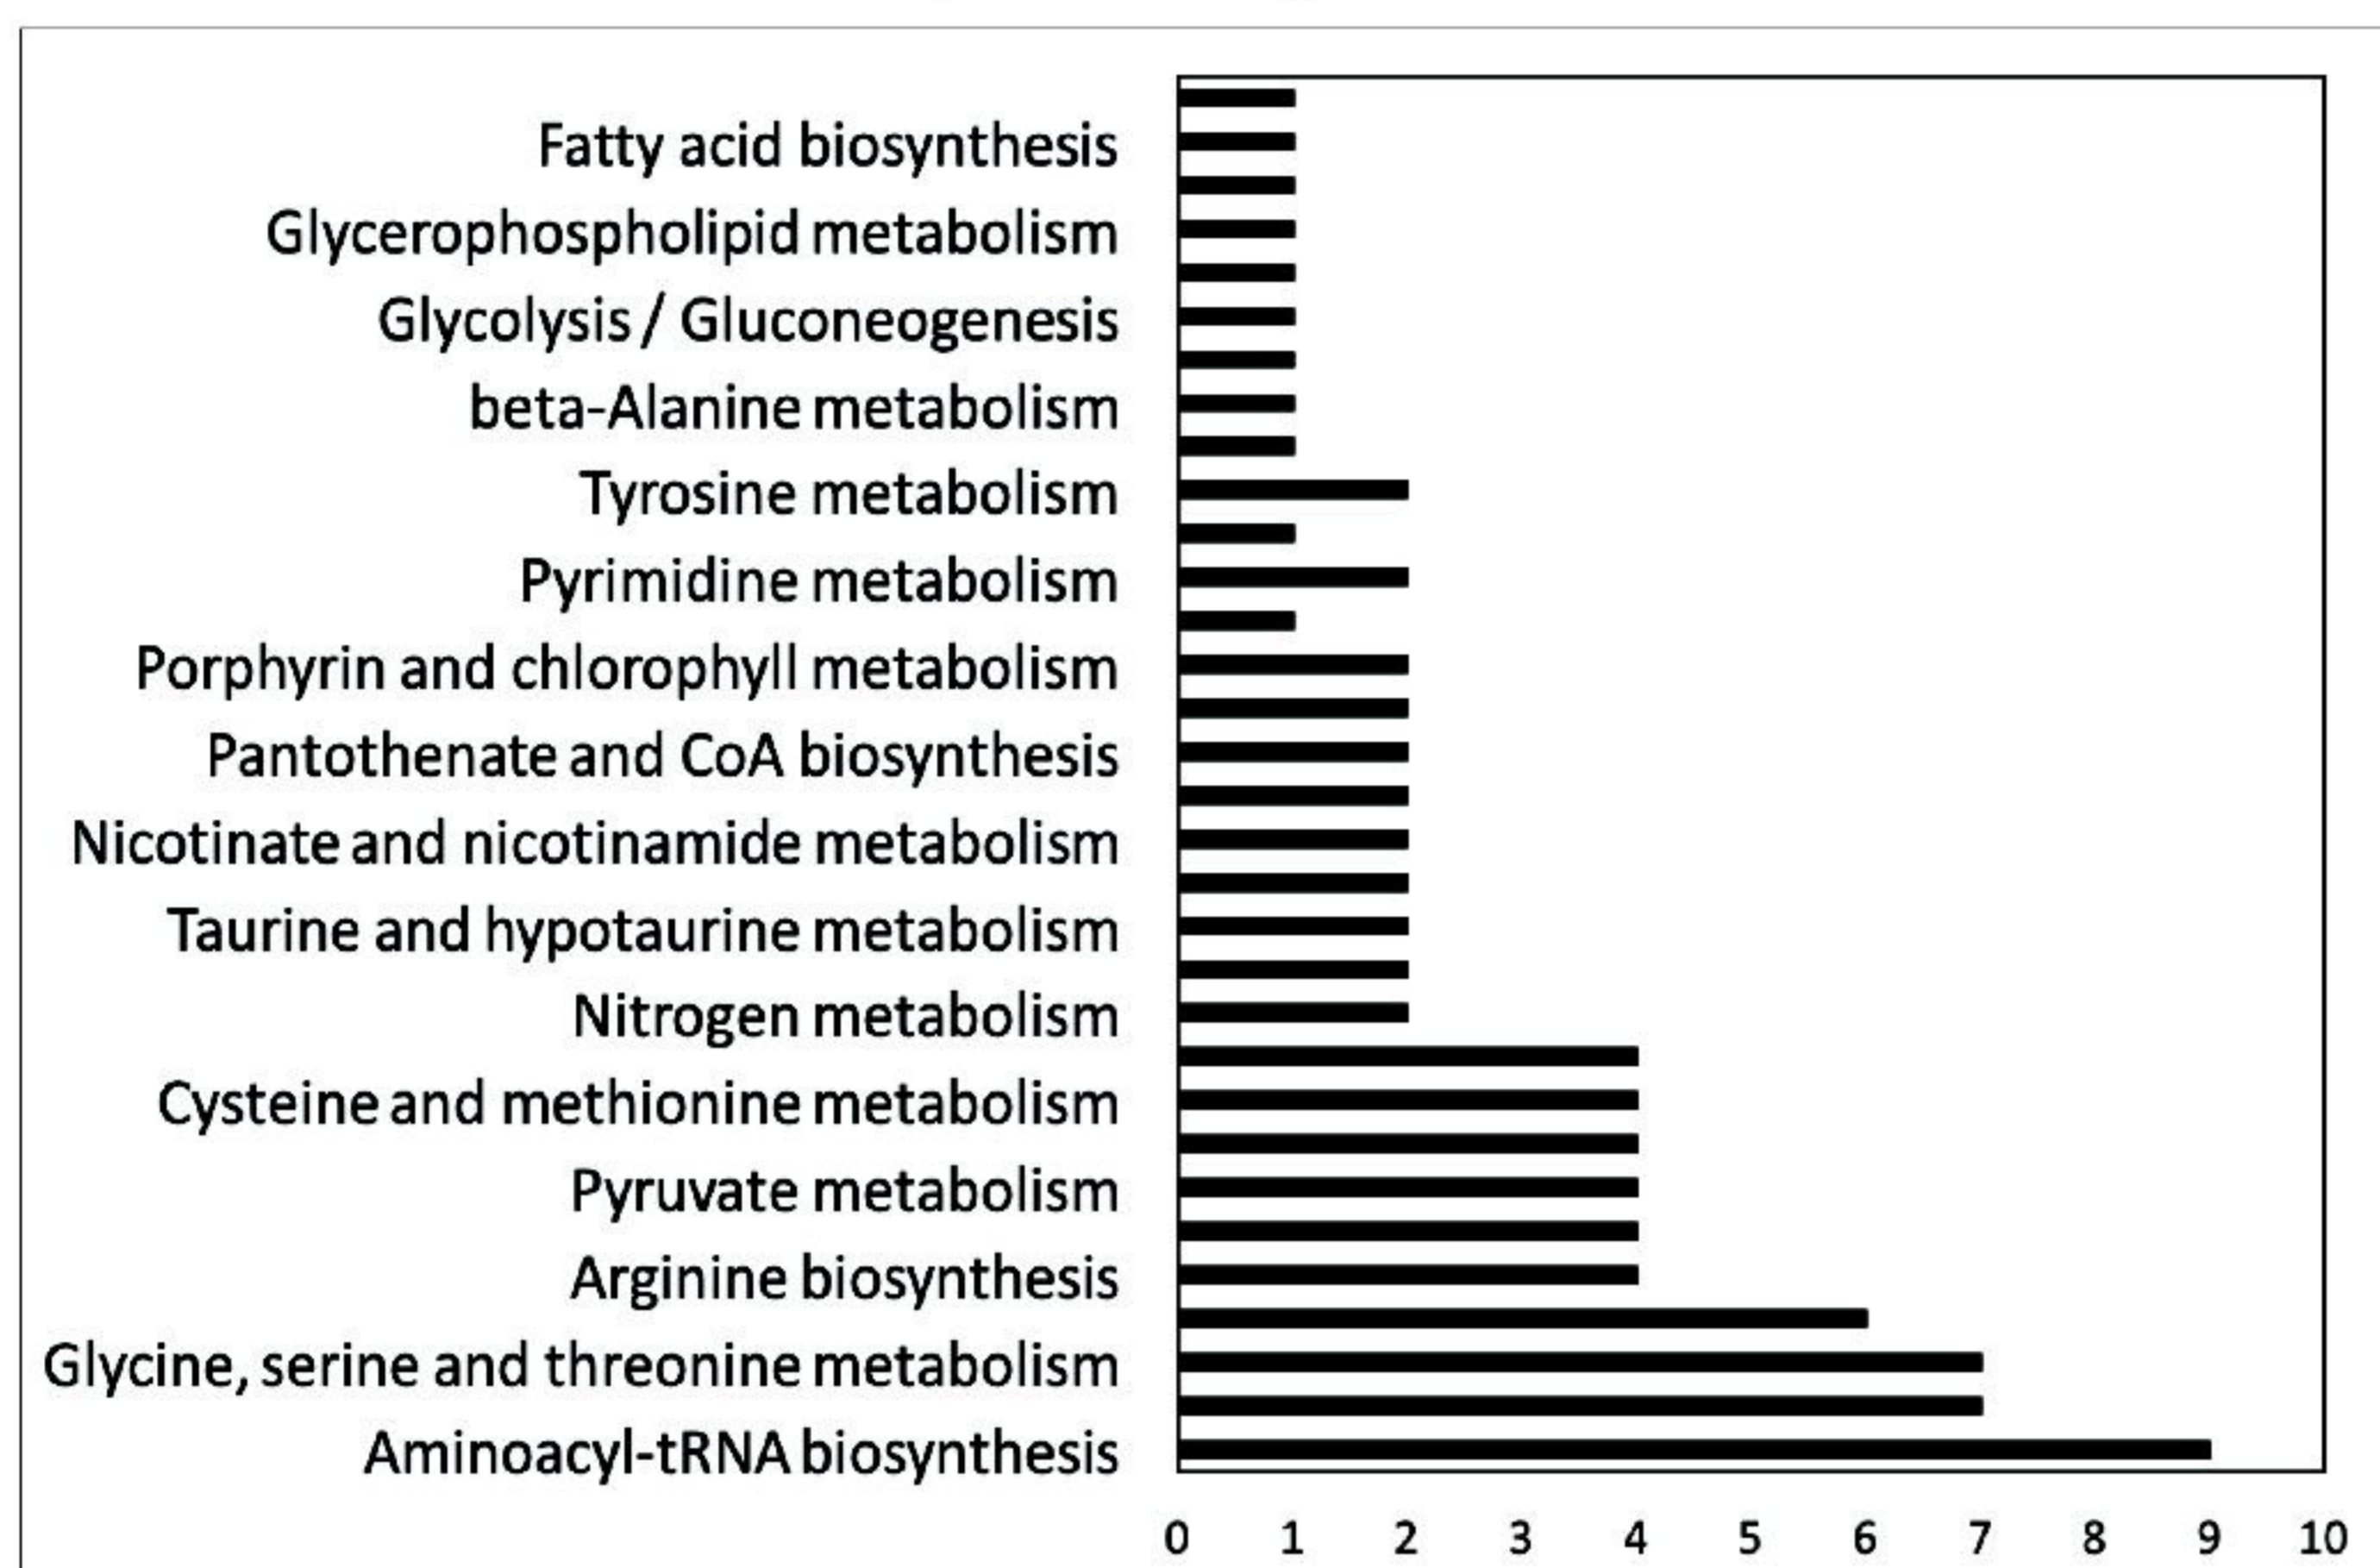

### Metabolic pathway enrichment

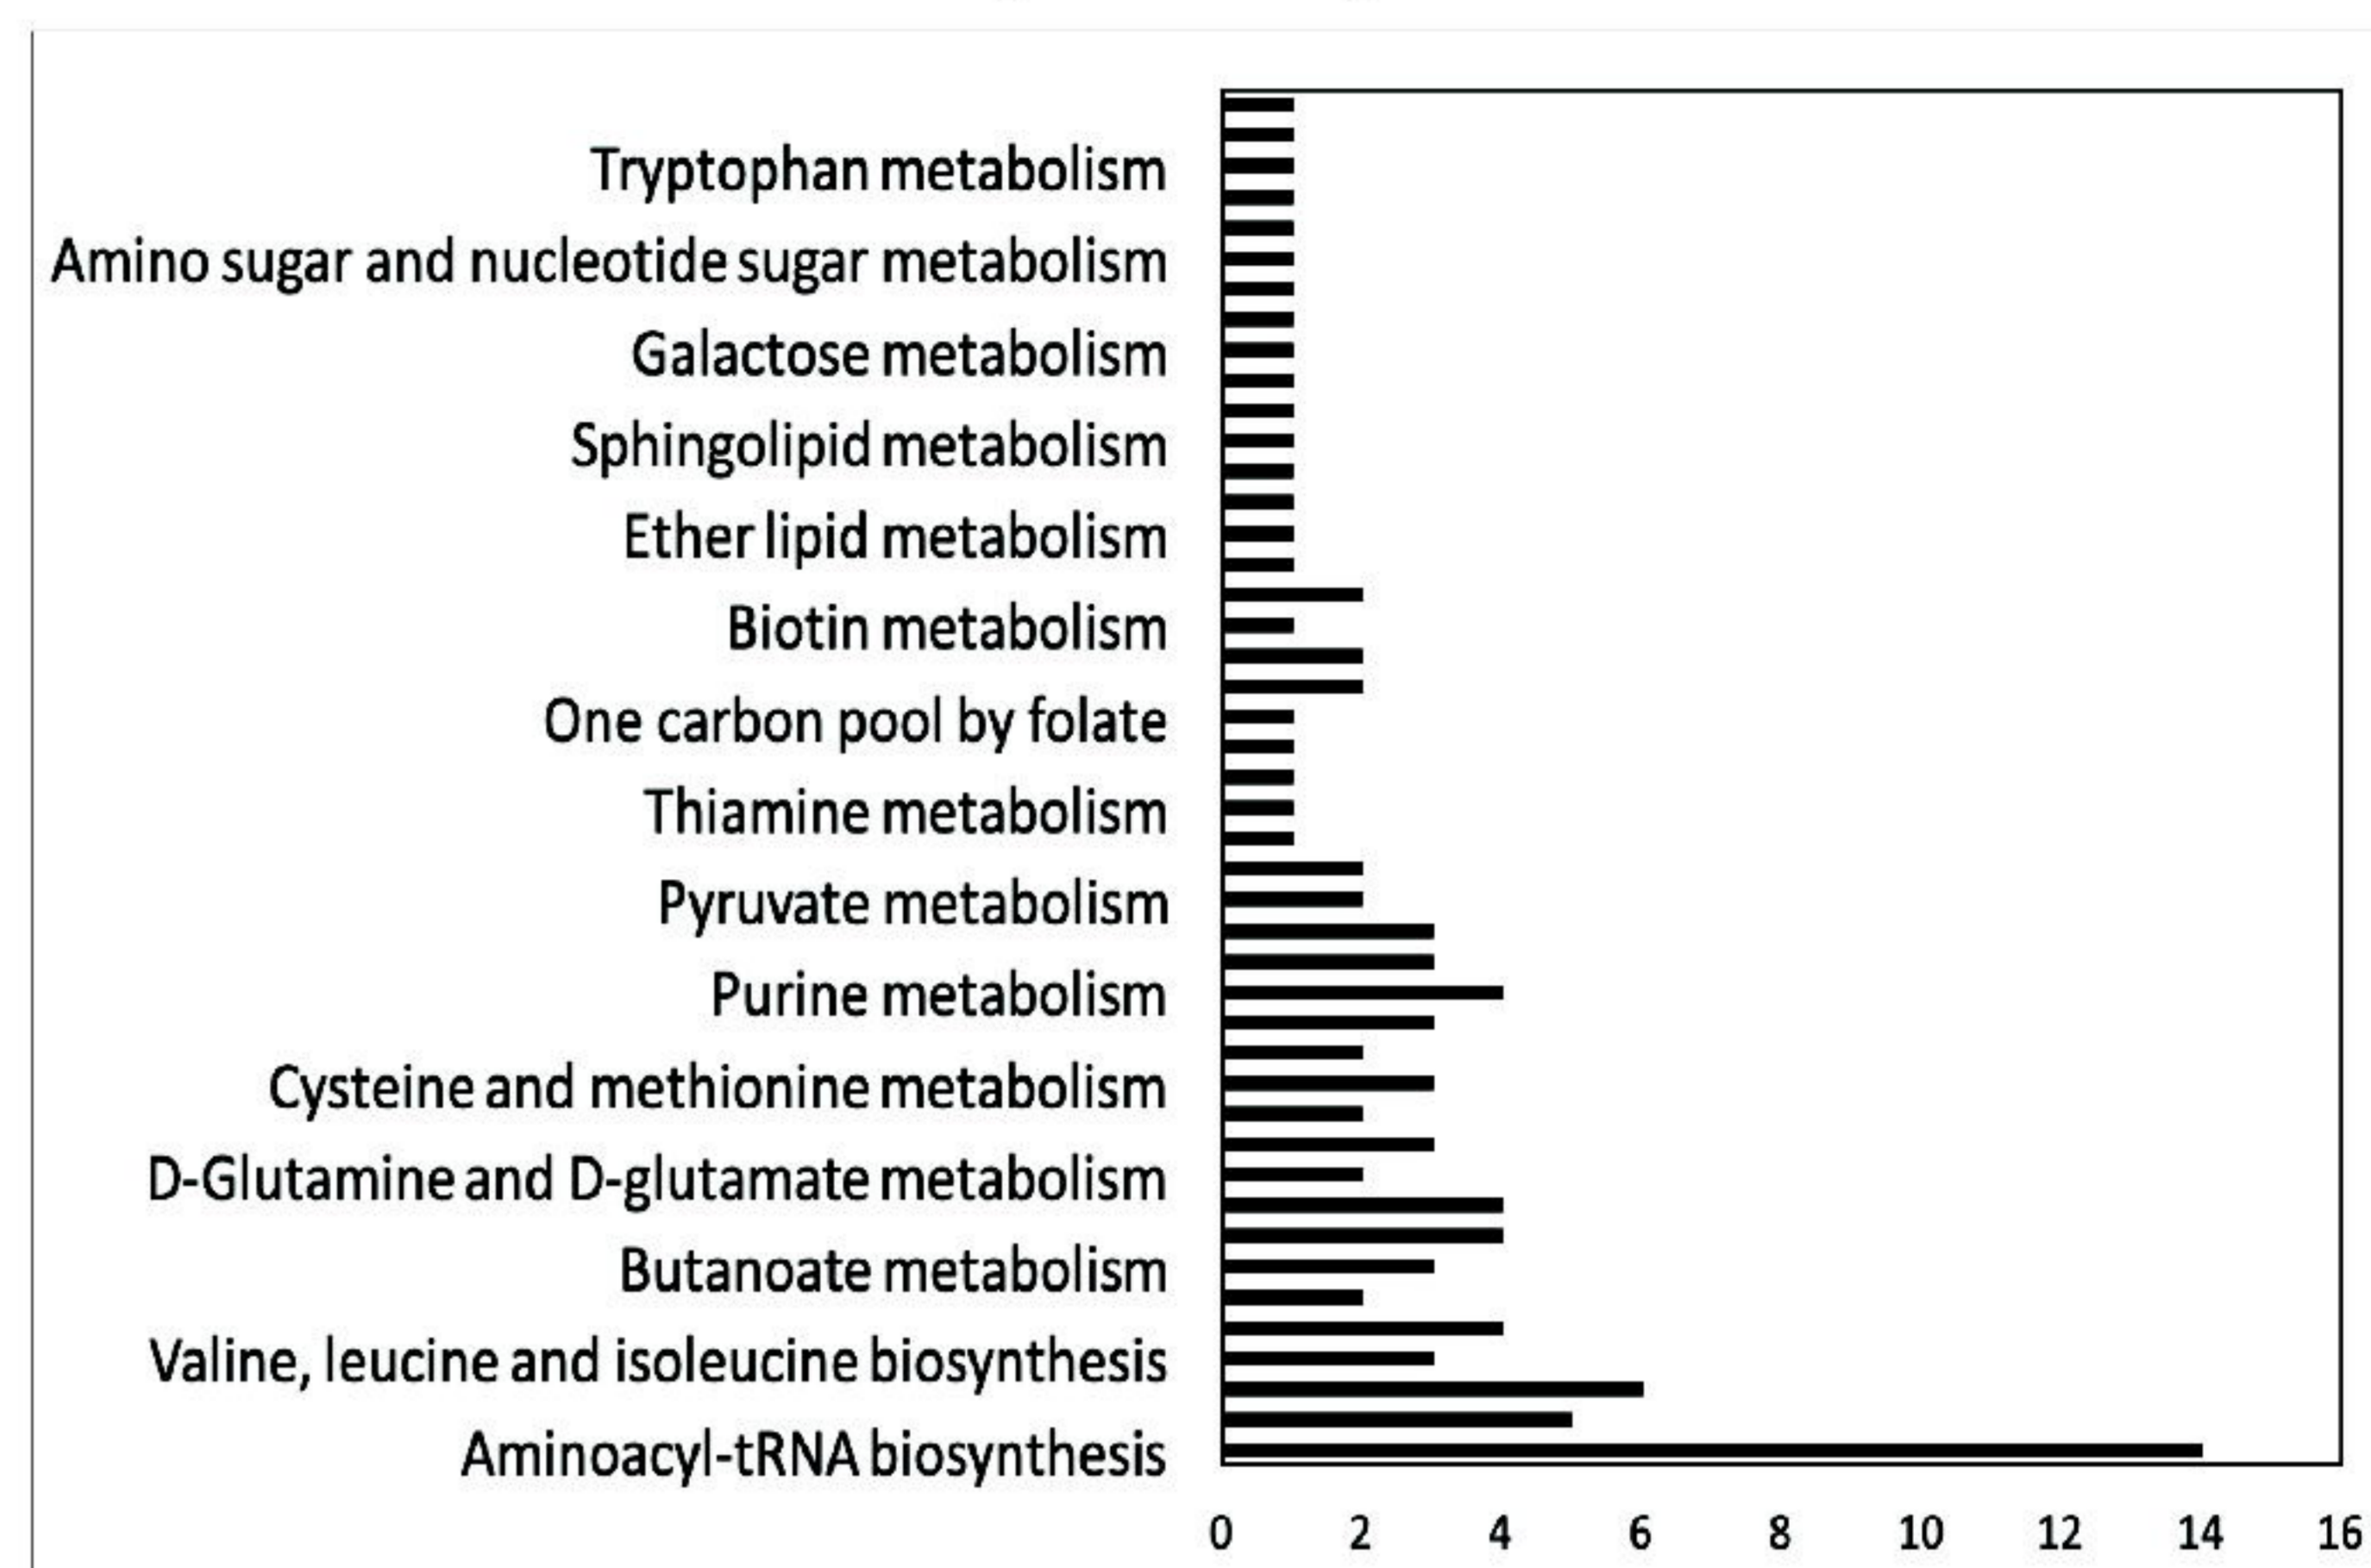

### C Mitochondrial Respiration in Rett neurons

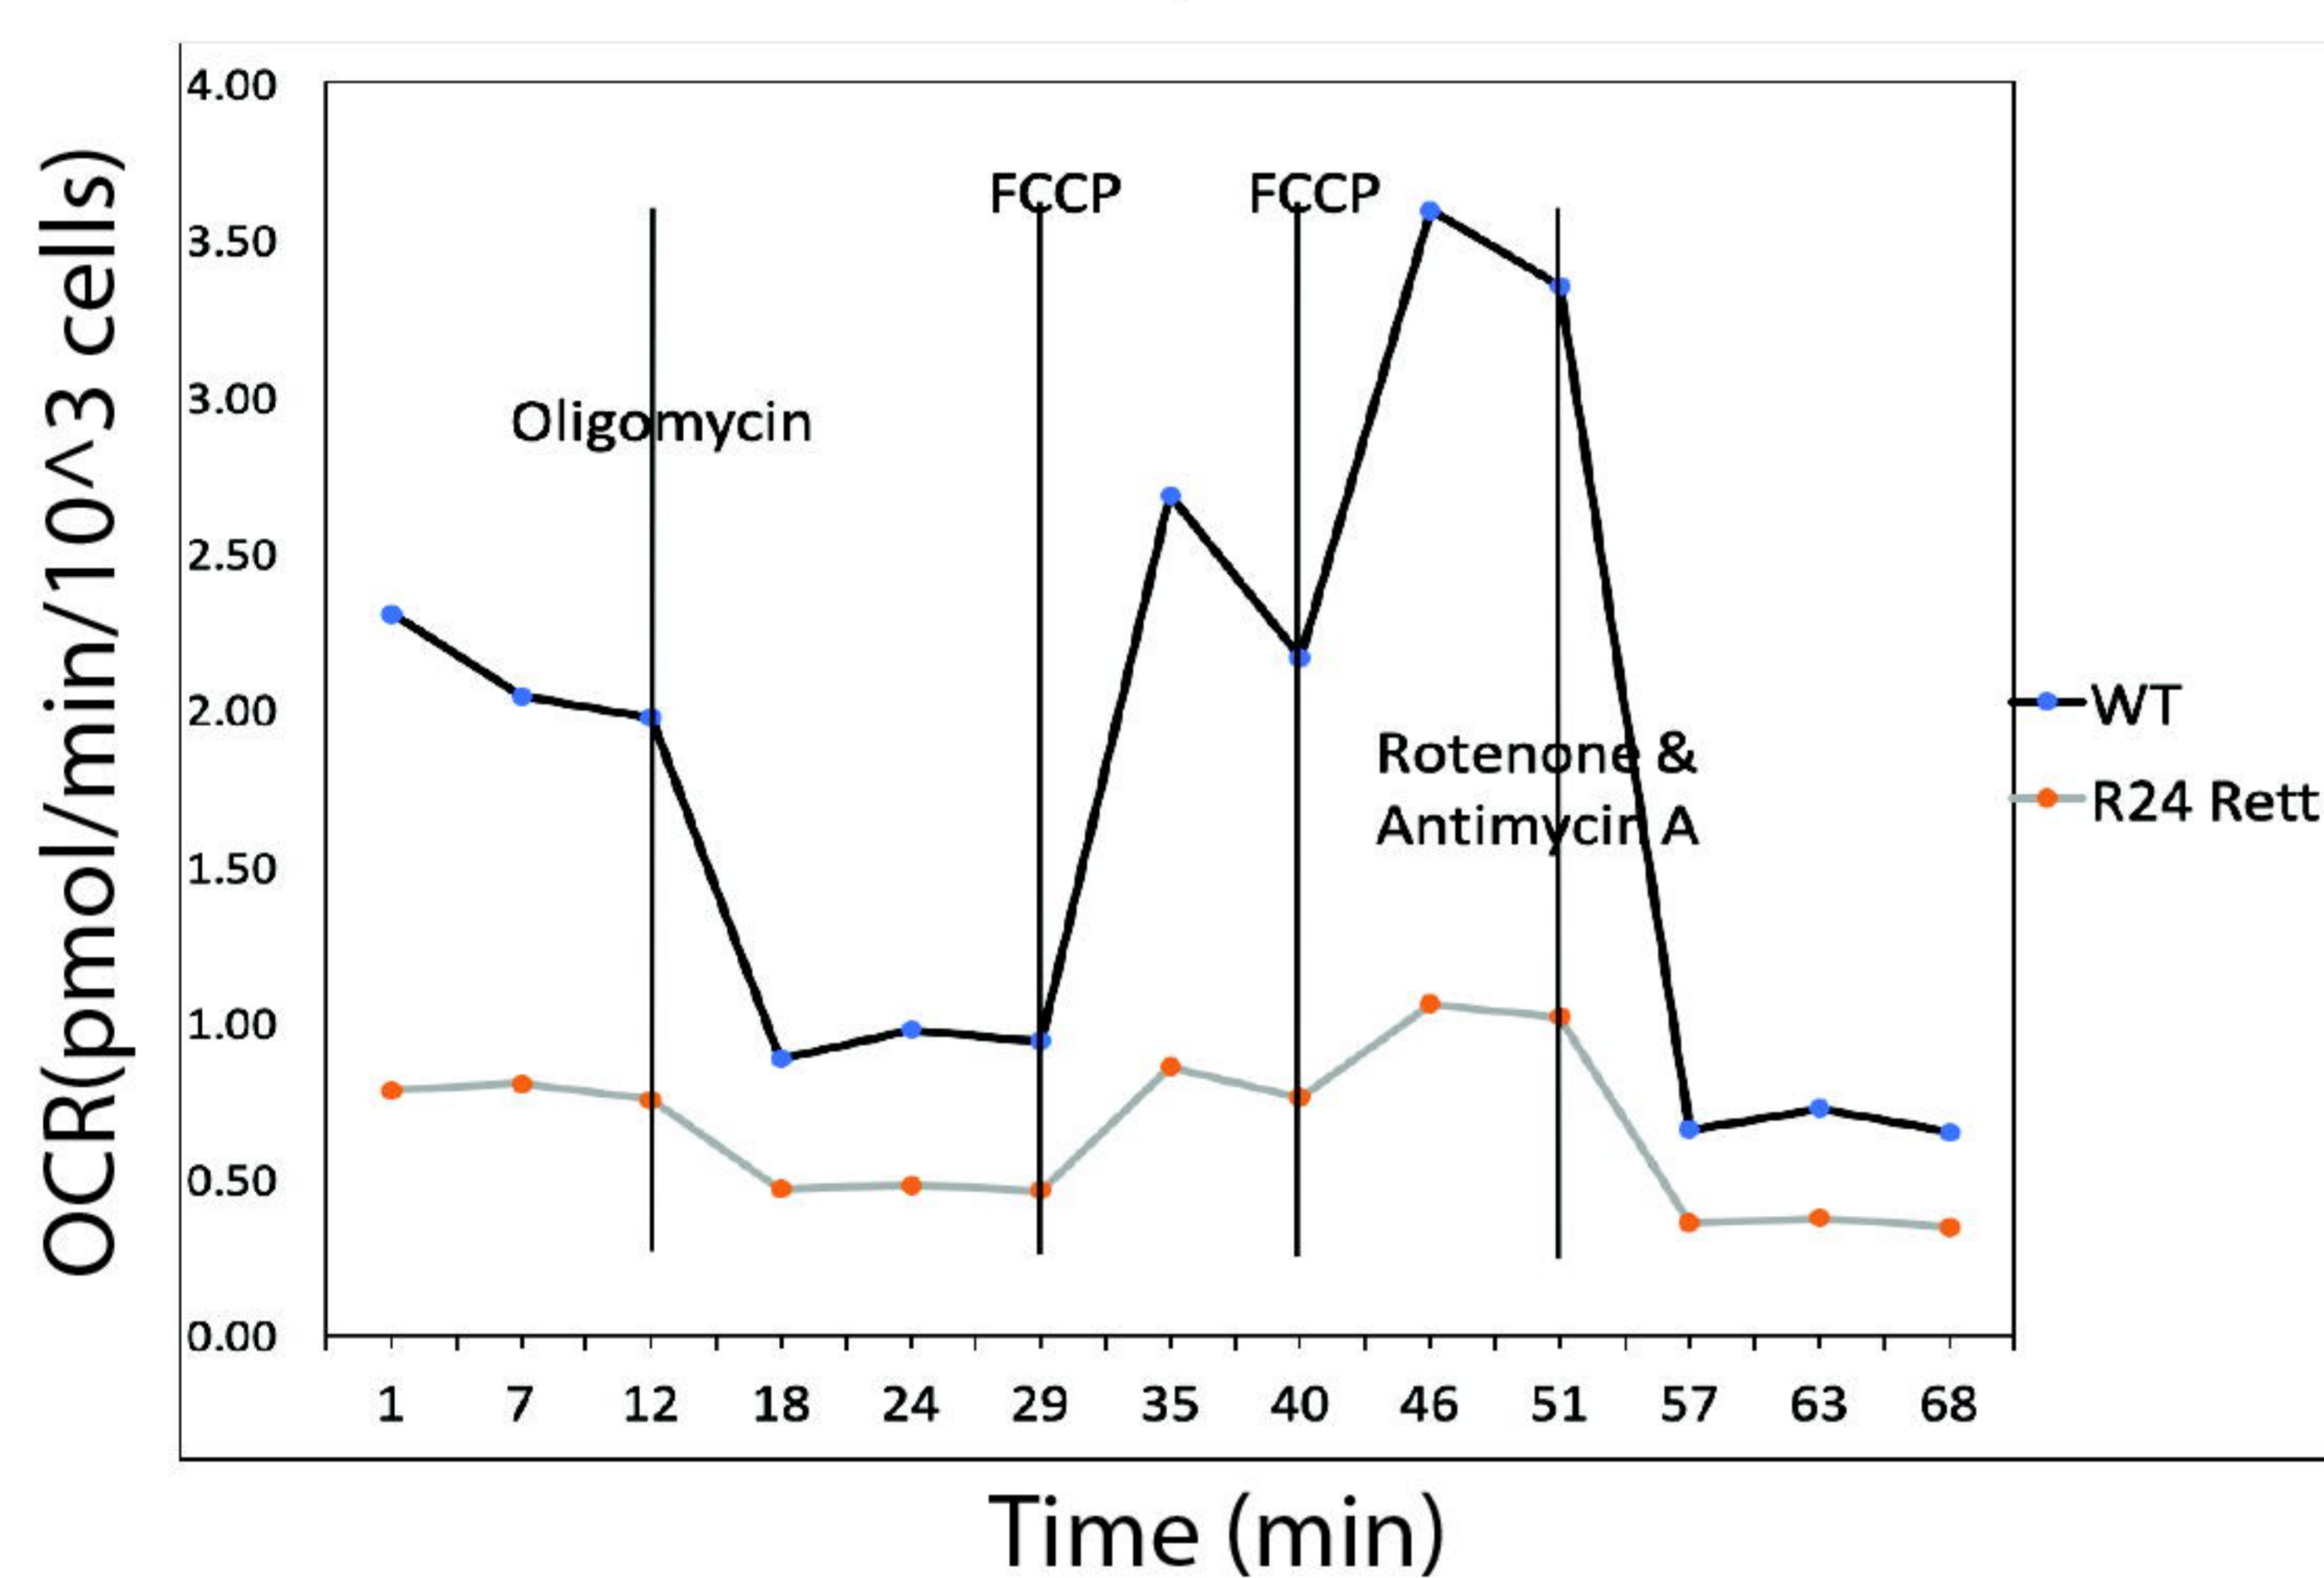

### Mitochondrial Respiration in Rett neurons

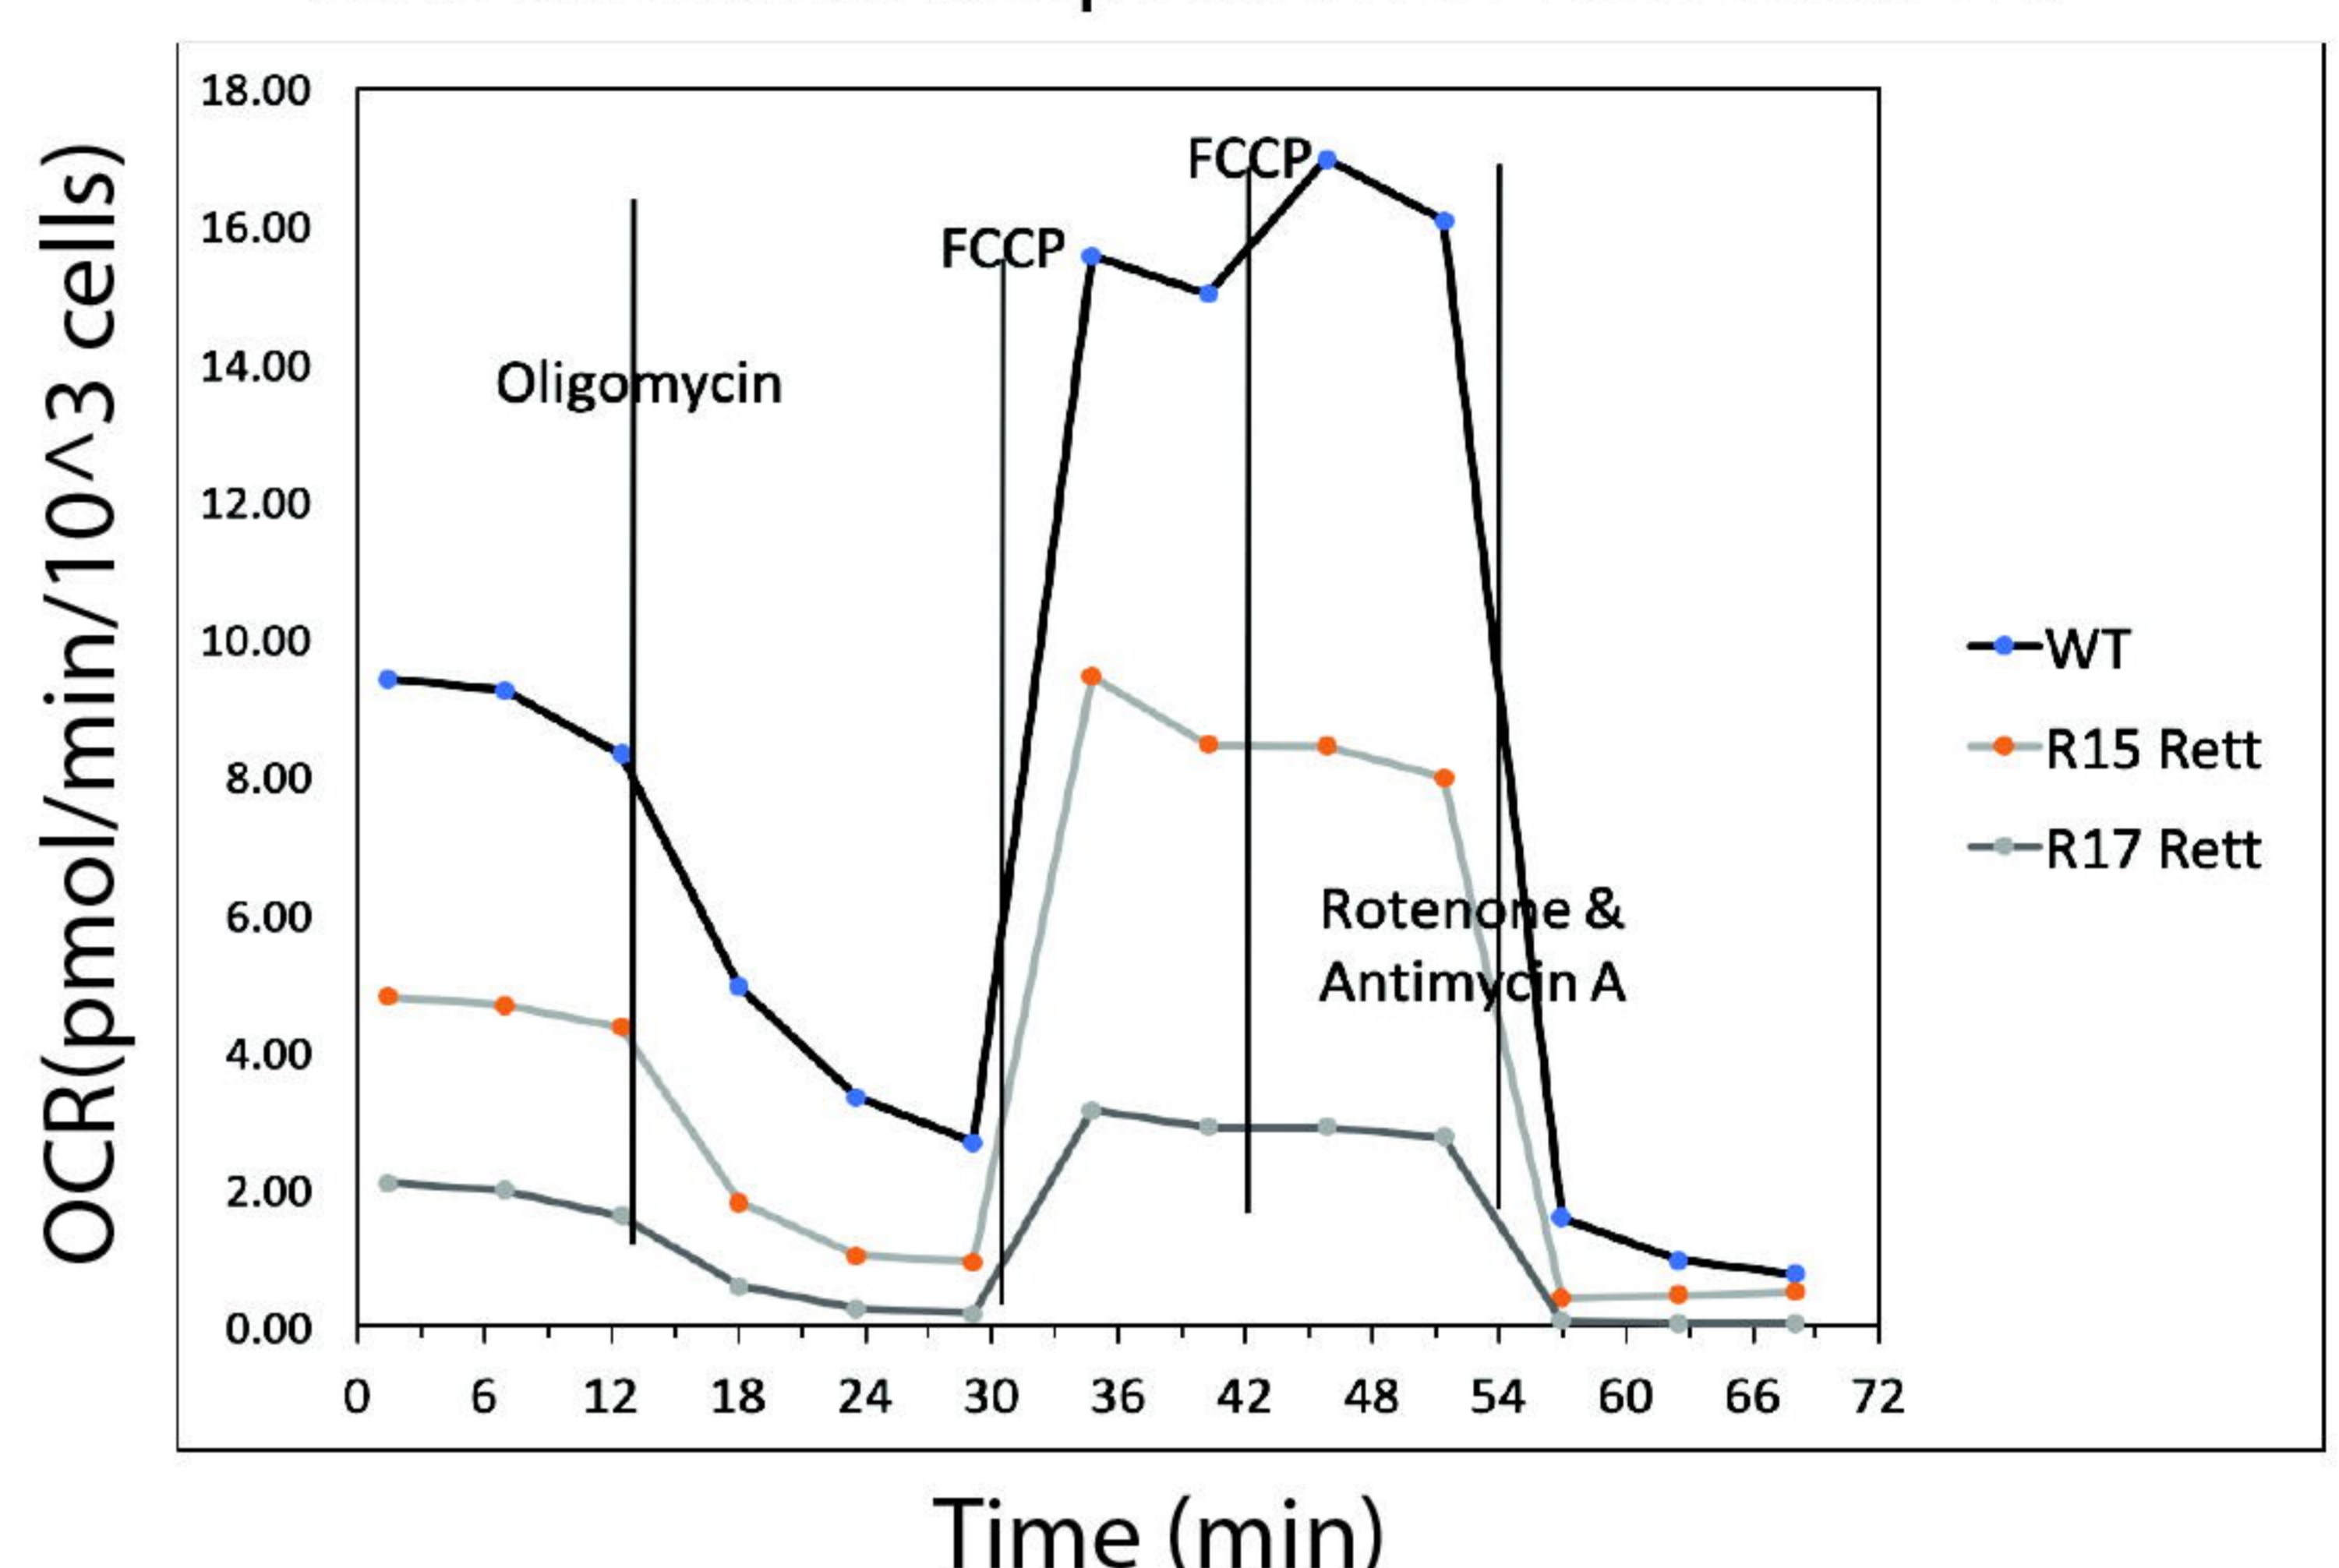

### D ATP consumption rate in Rett neurons

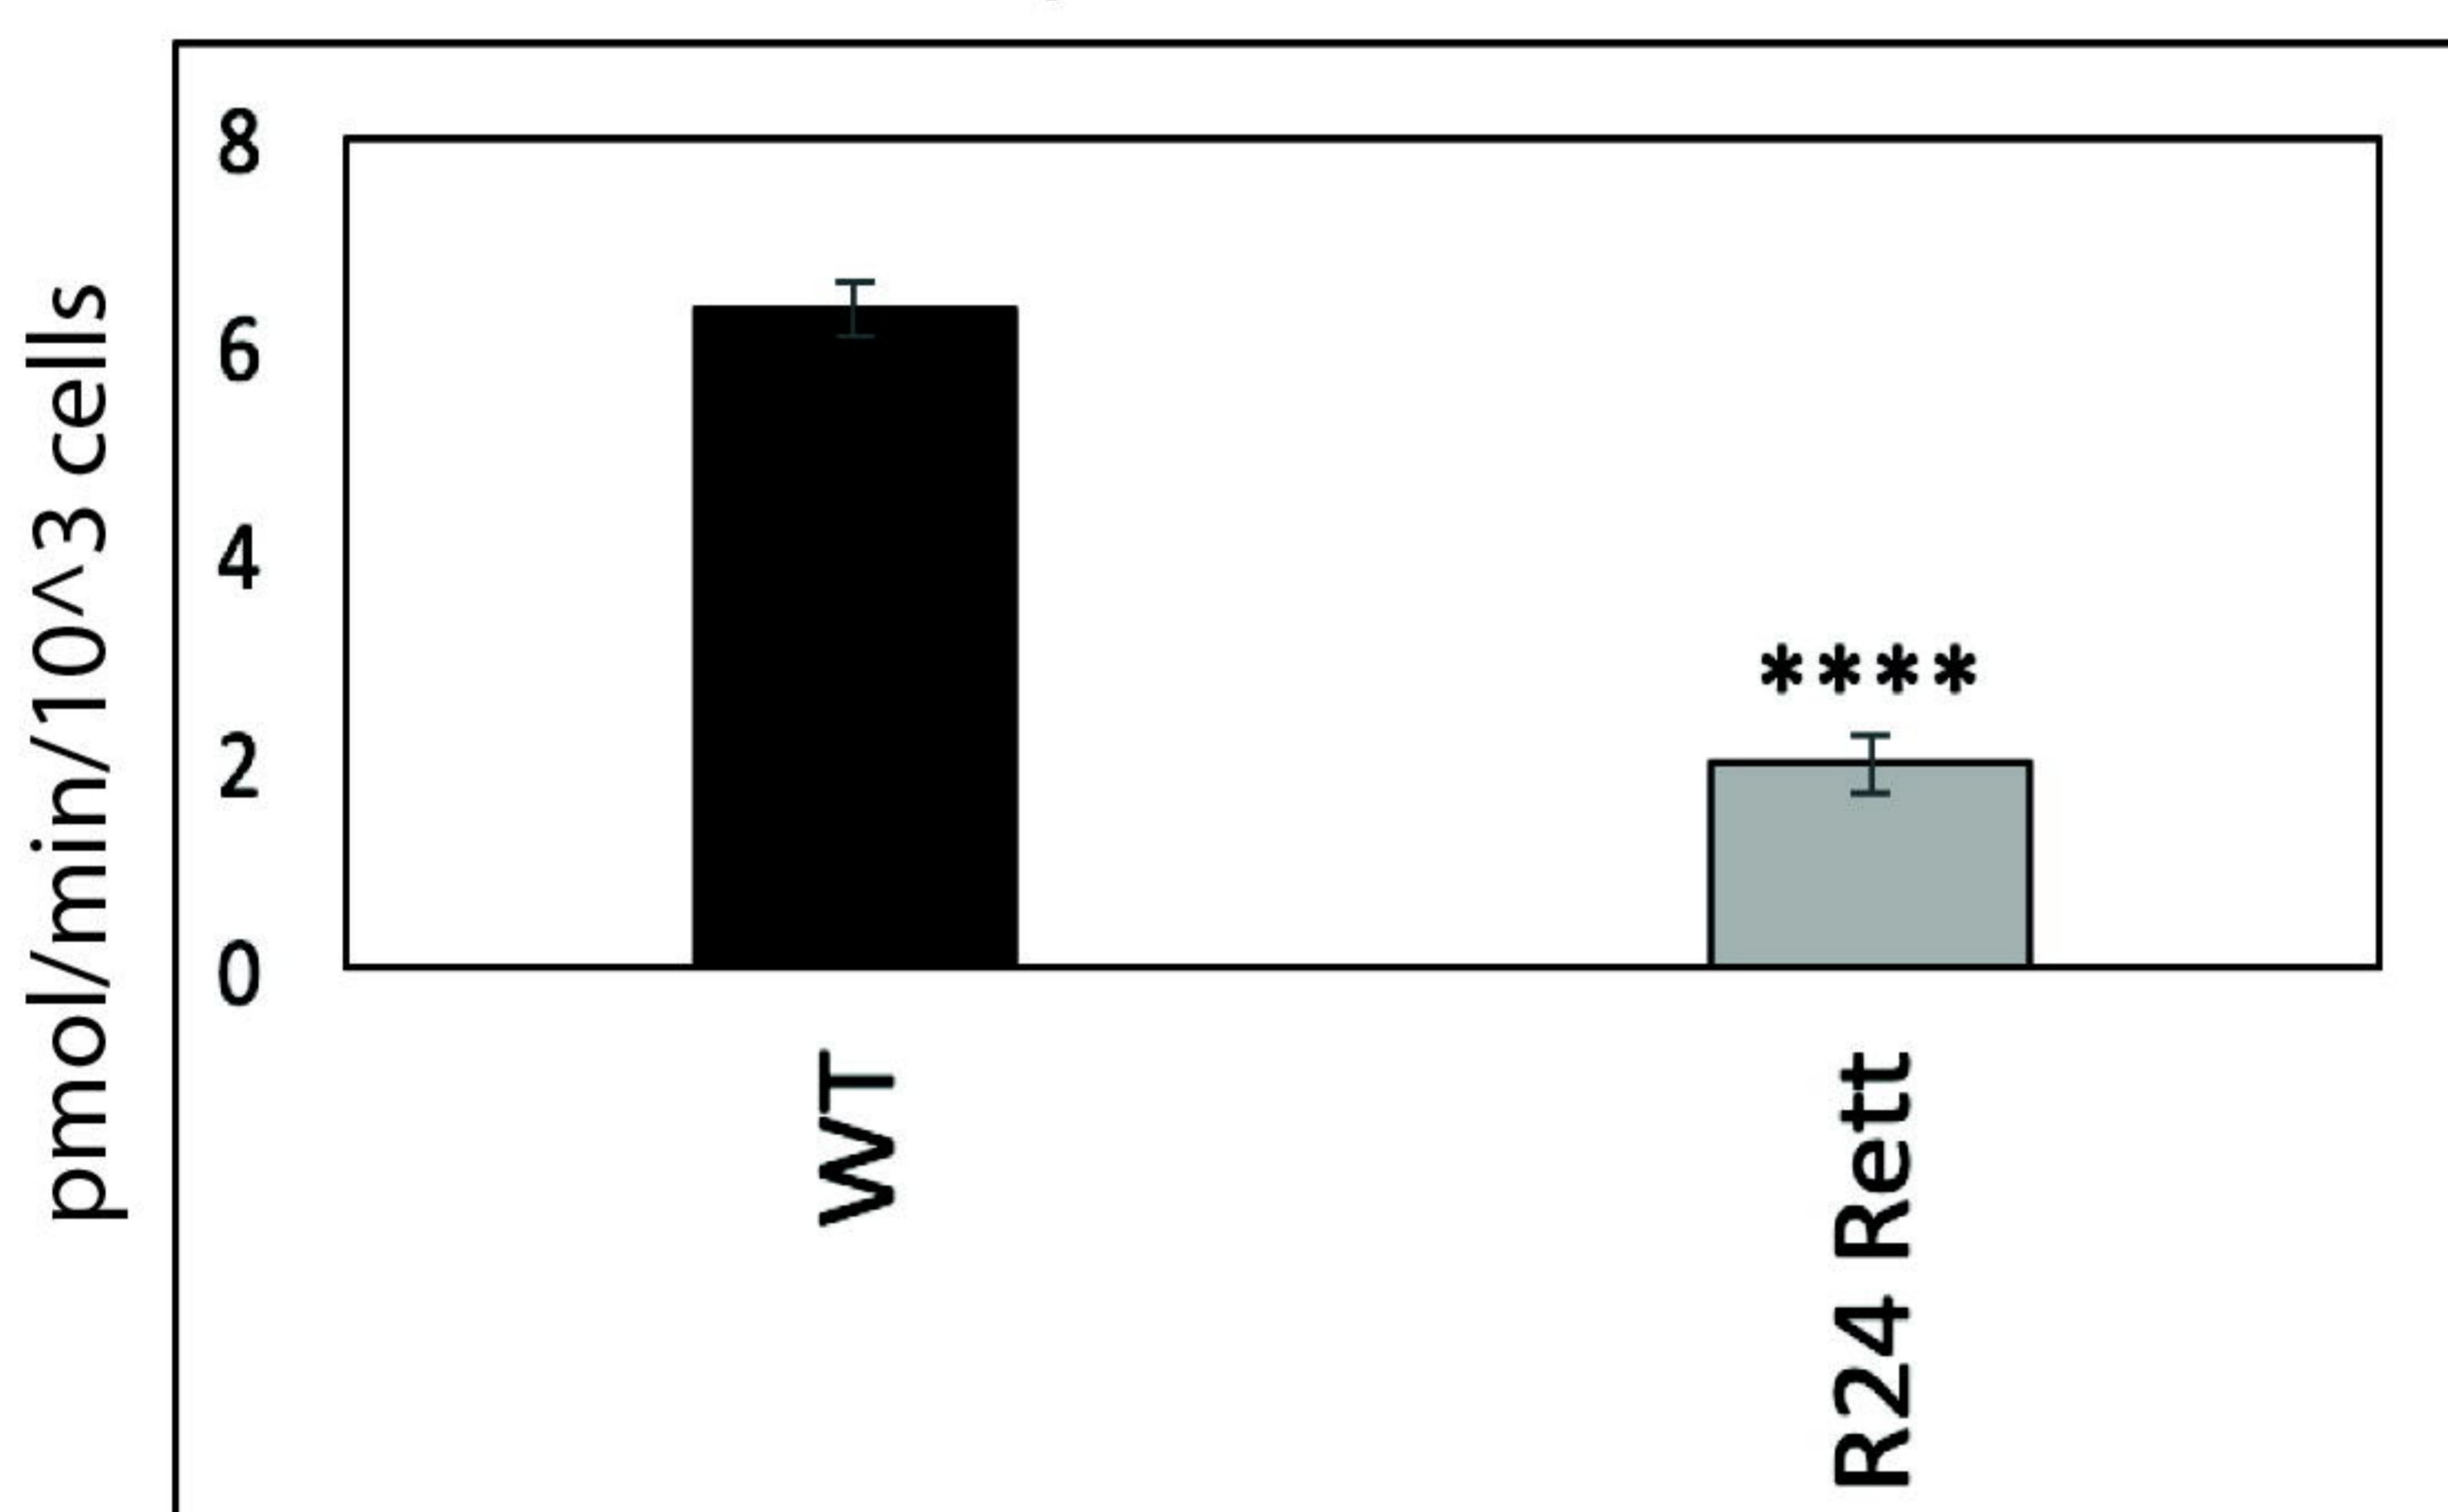

### ATP consumption rate in Rett neurons

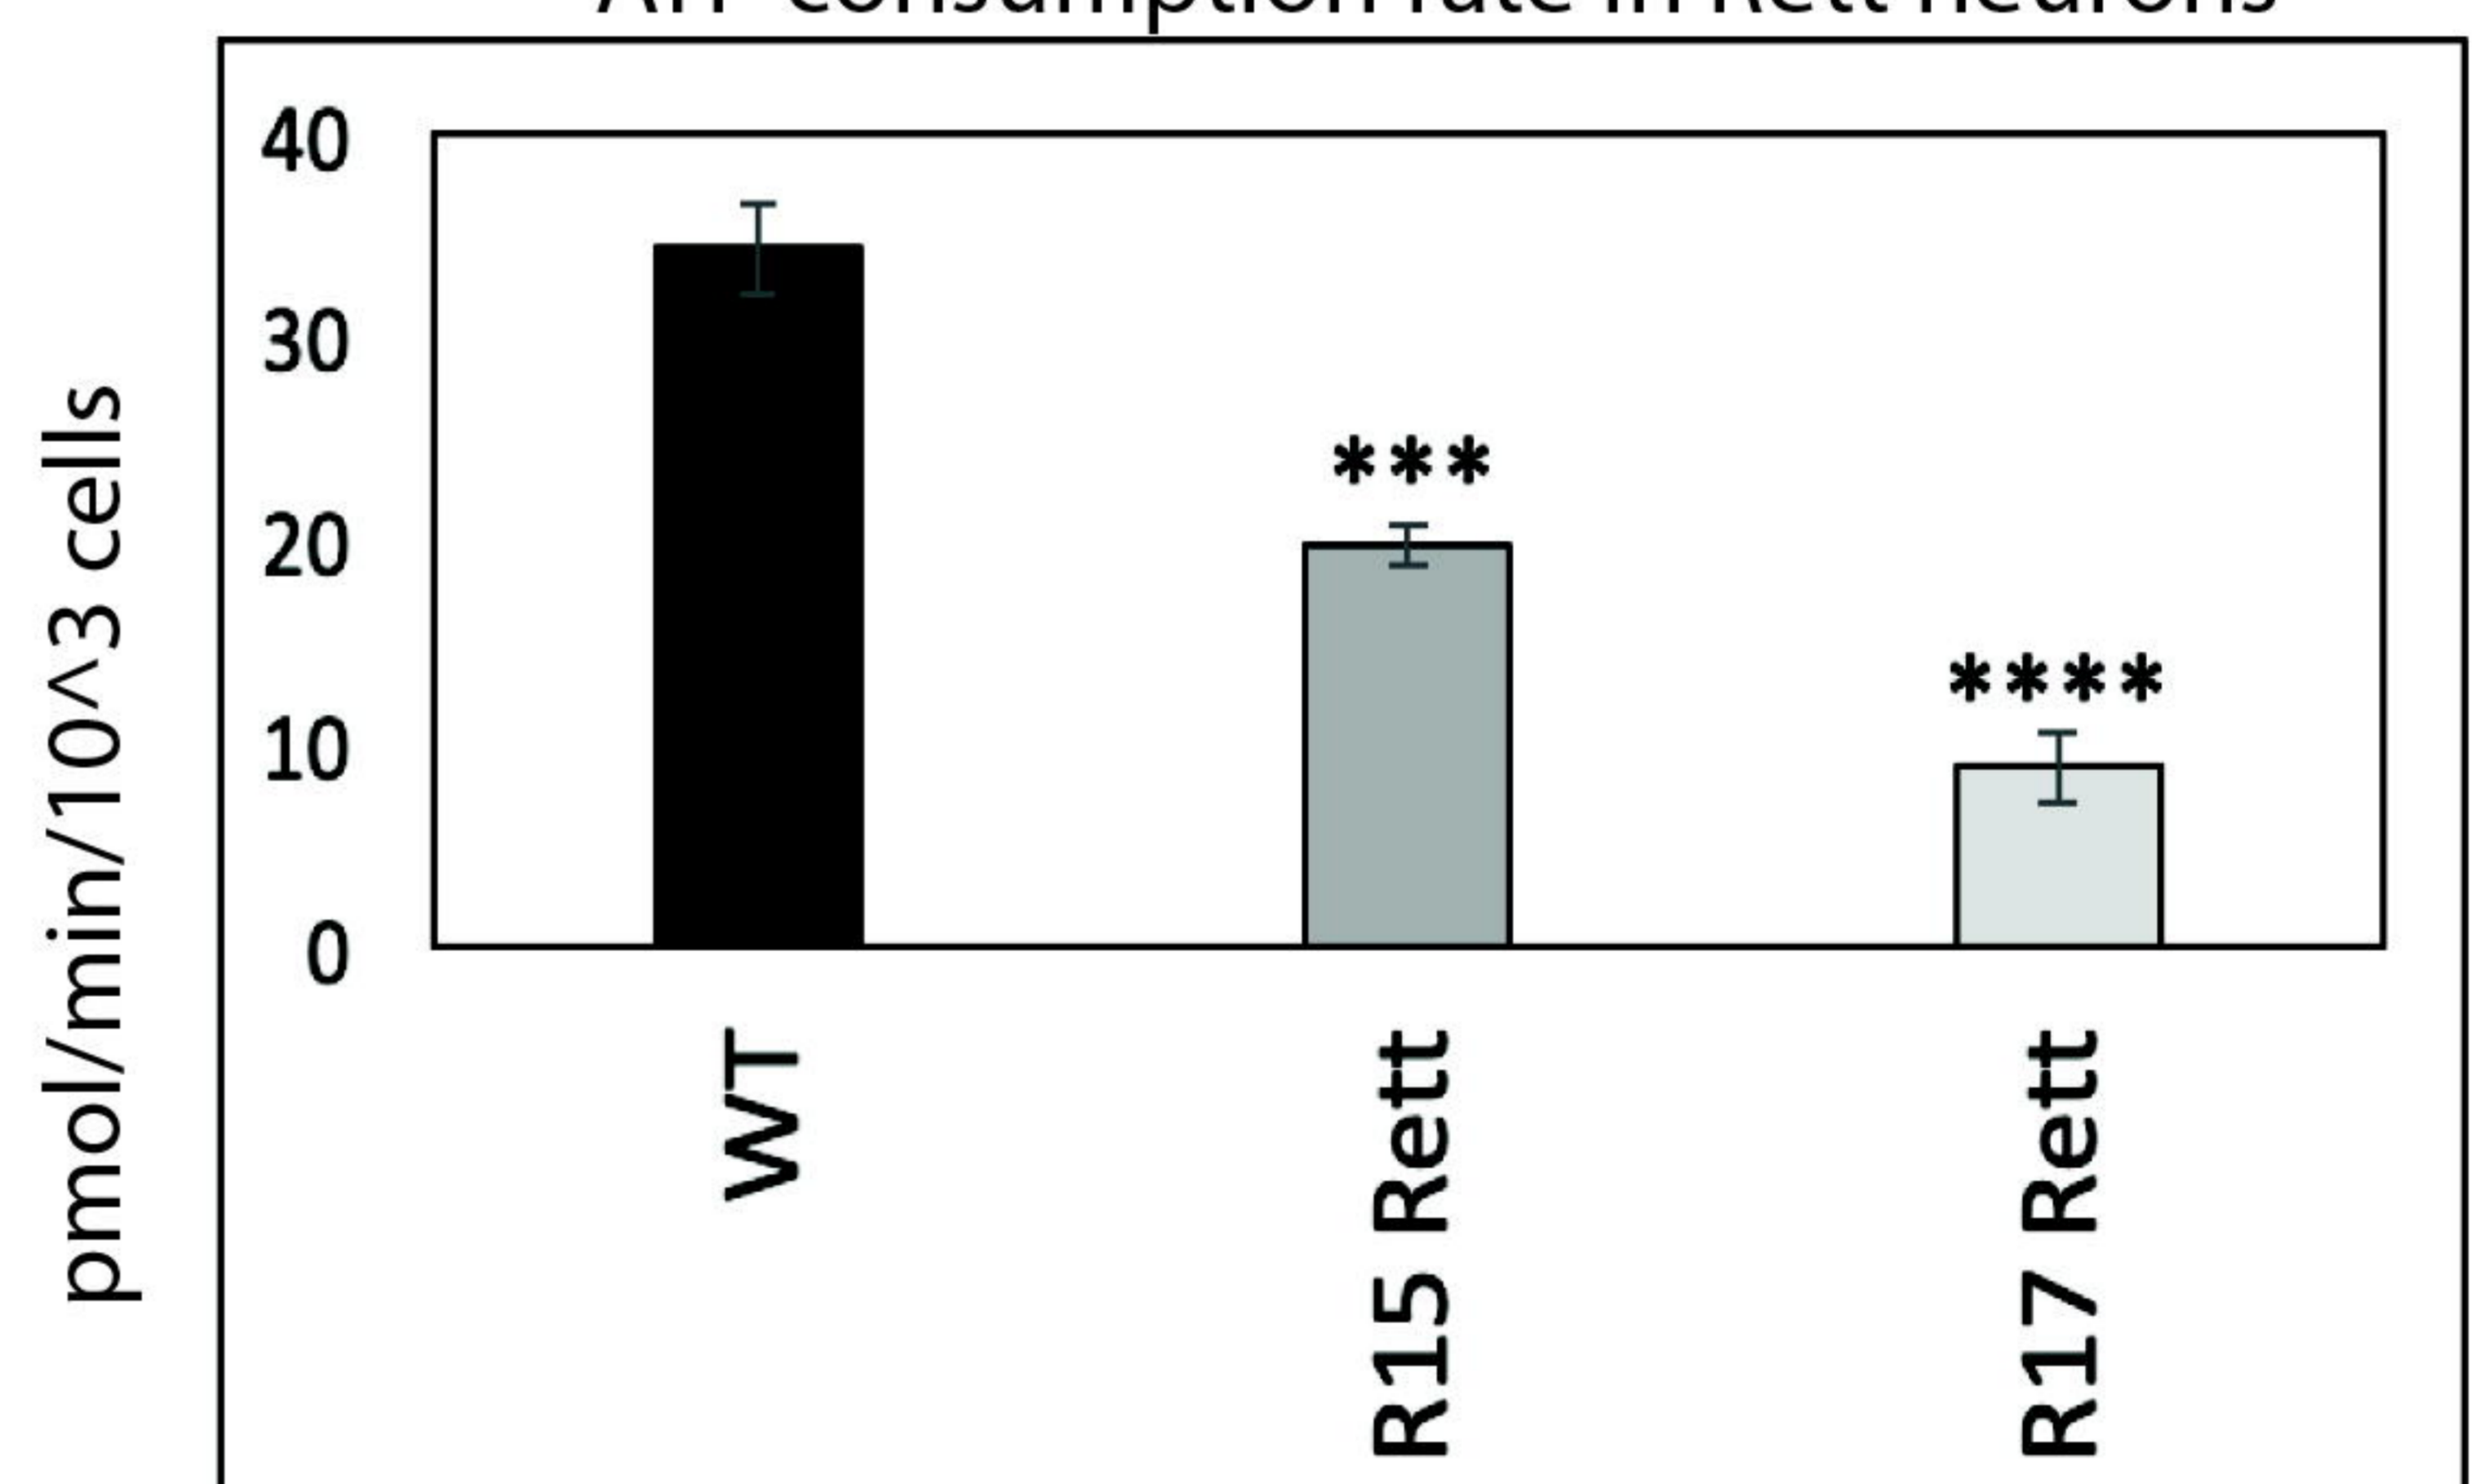

### F TF regulating top upregulated metabolic genes

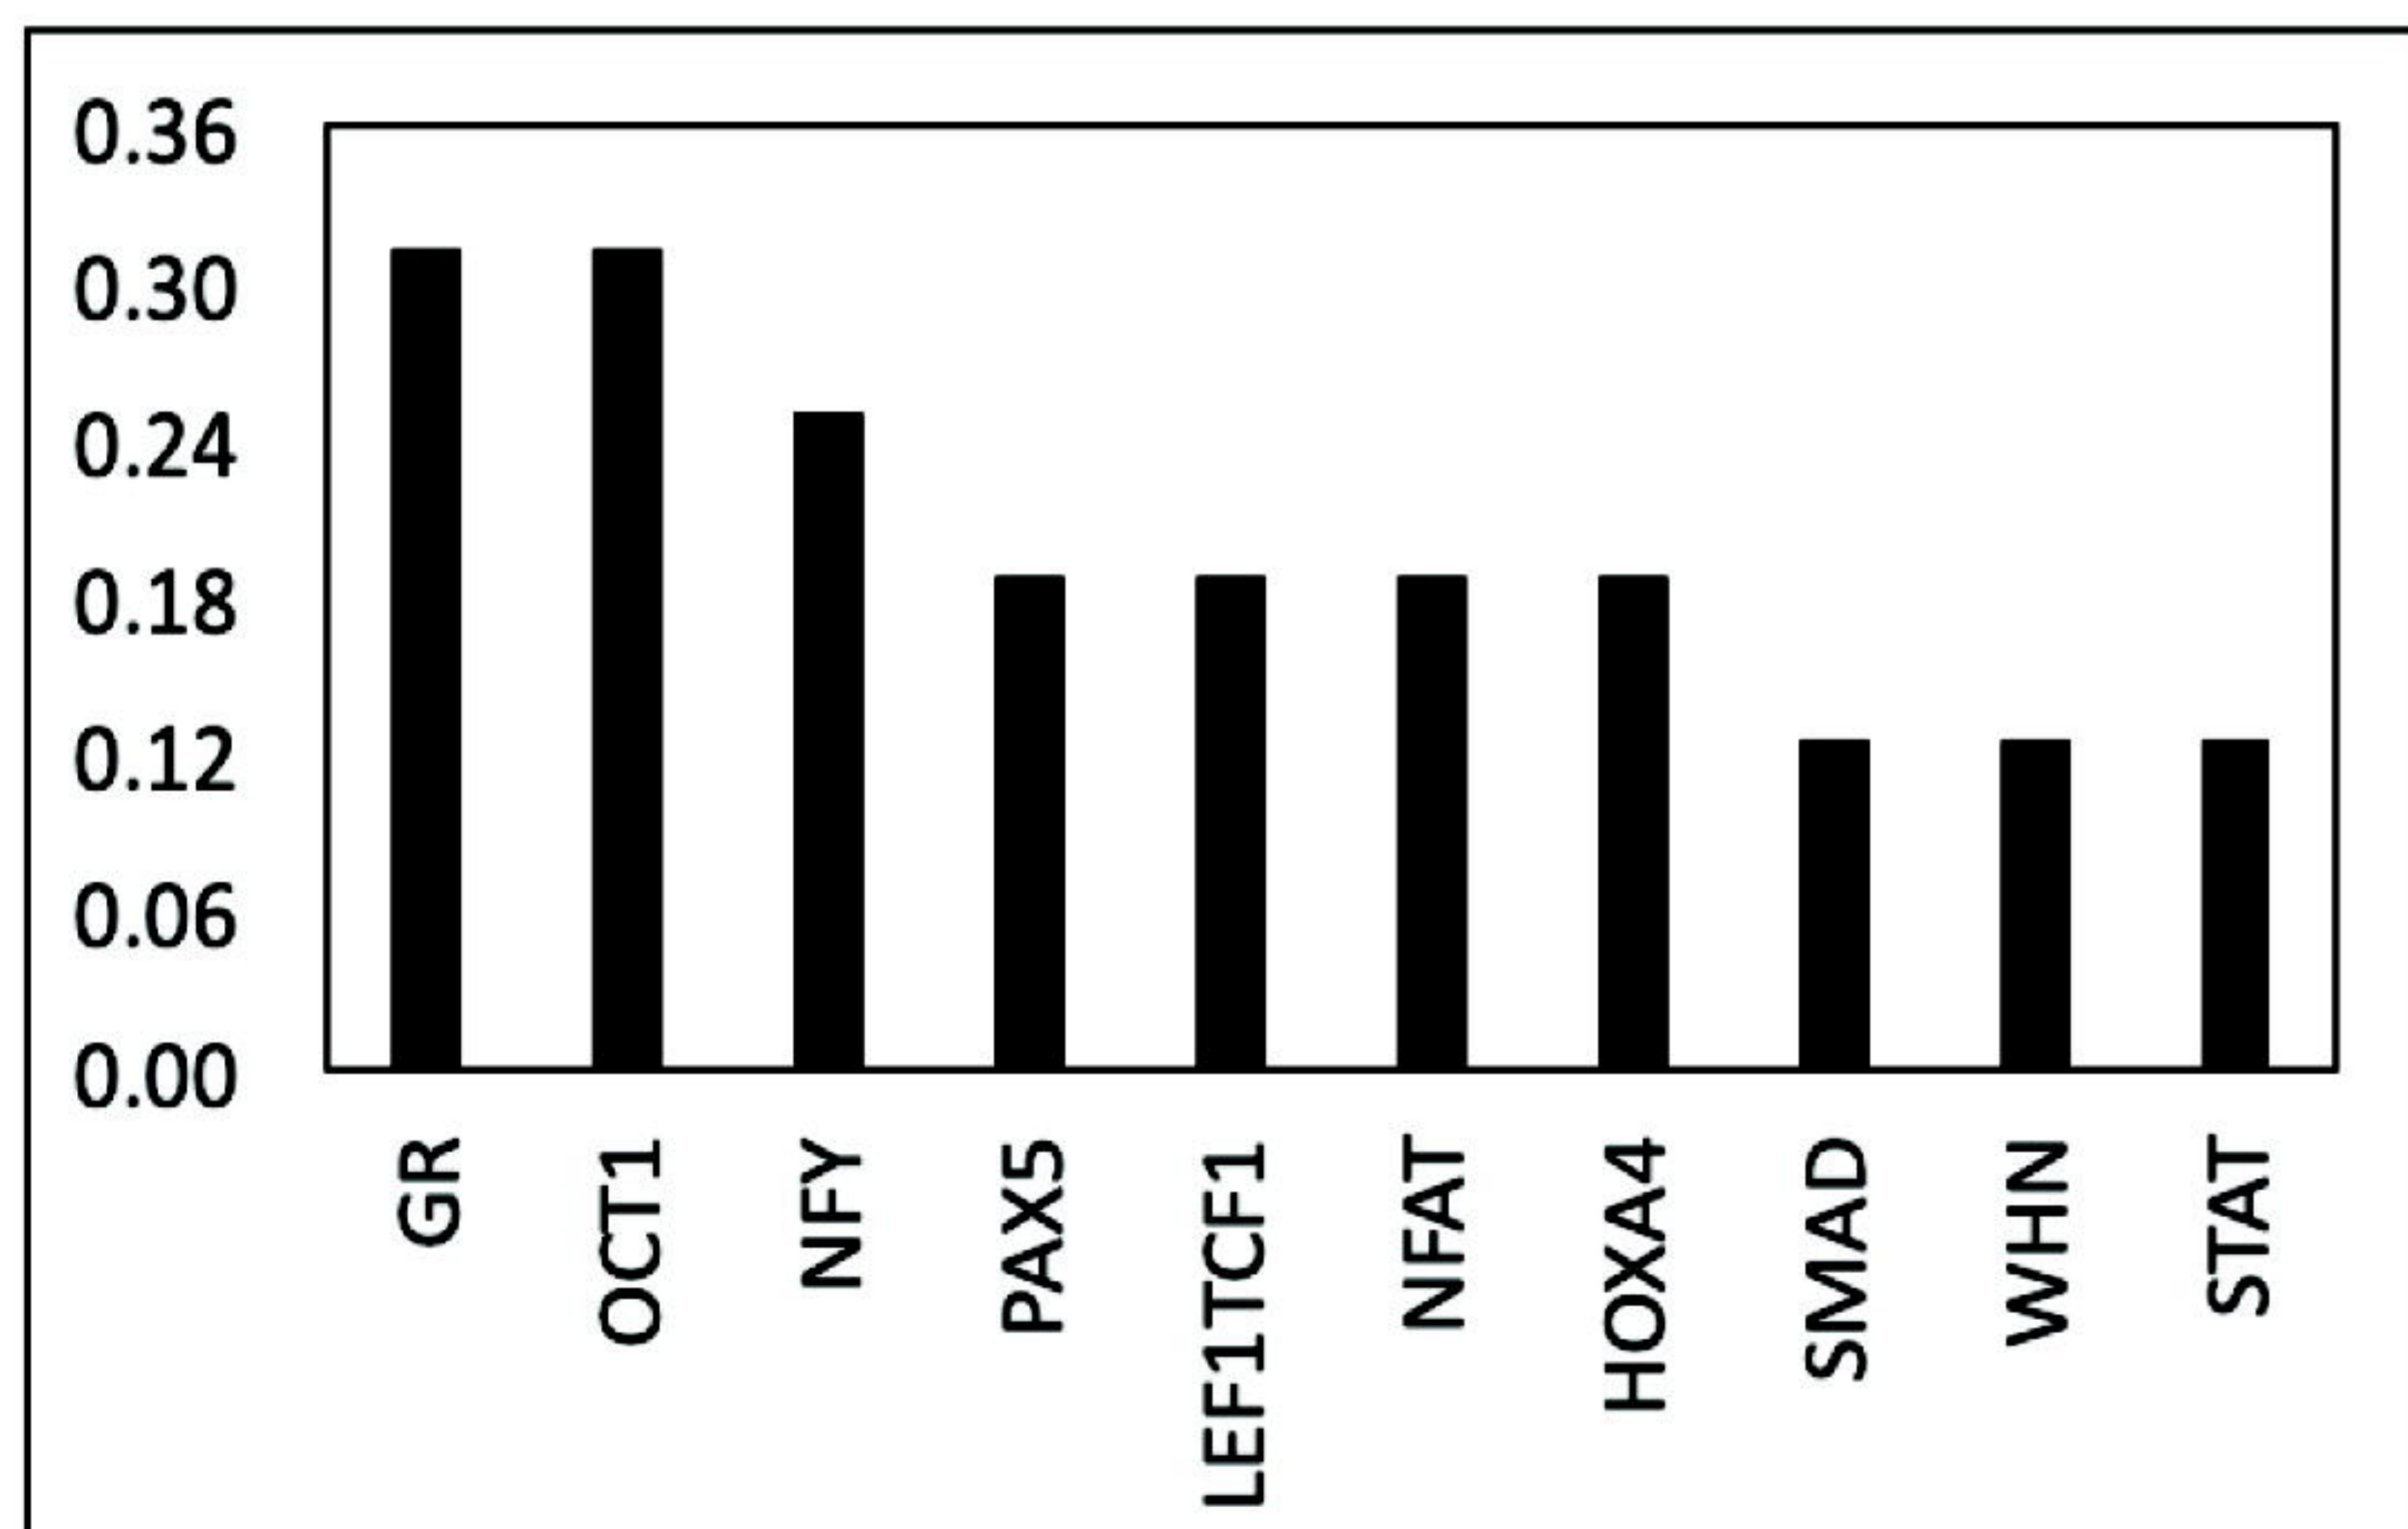

### TF regulating top downregulated metabolic genes

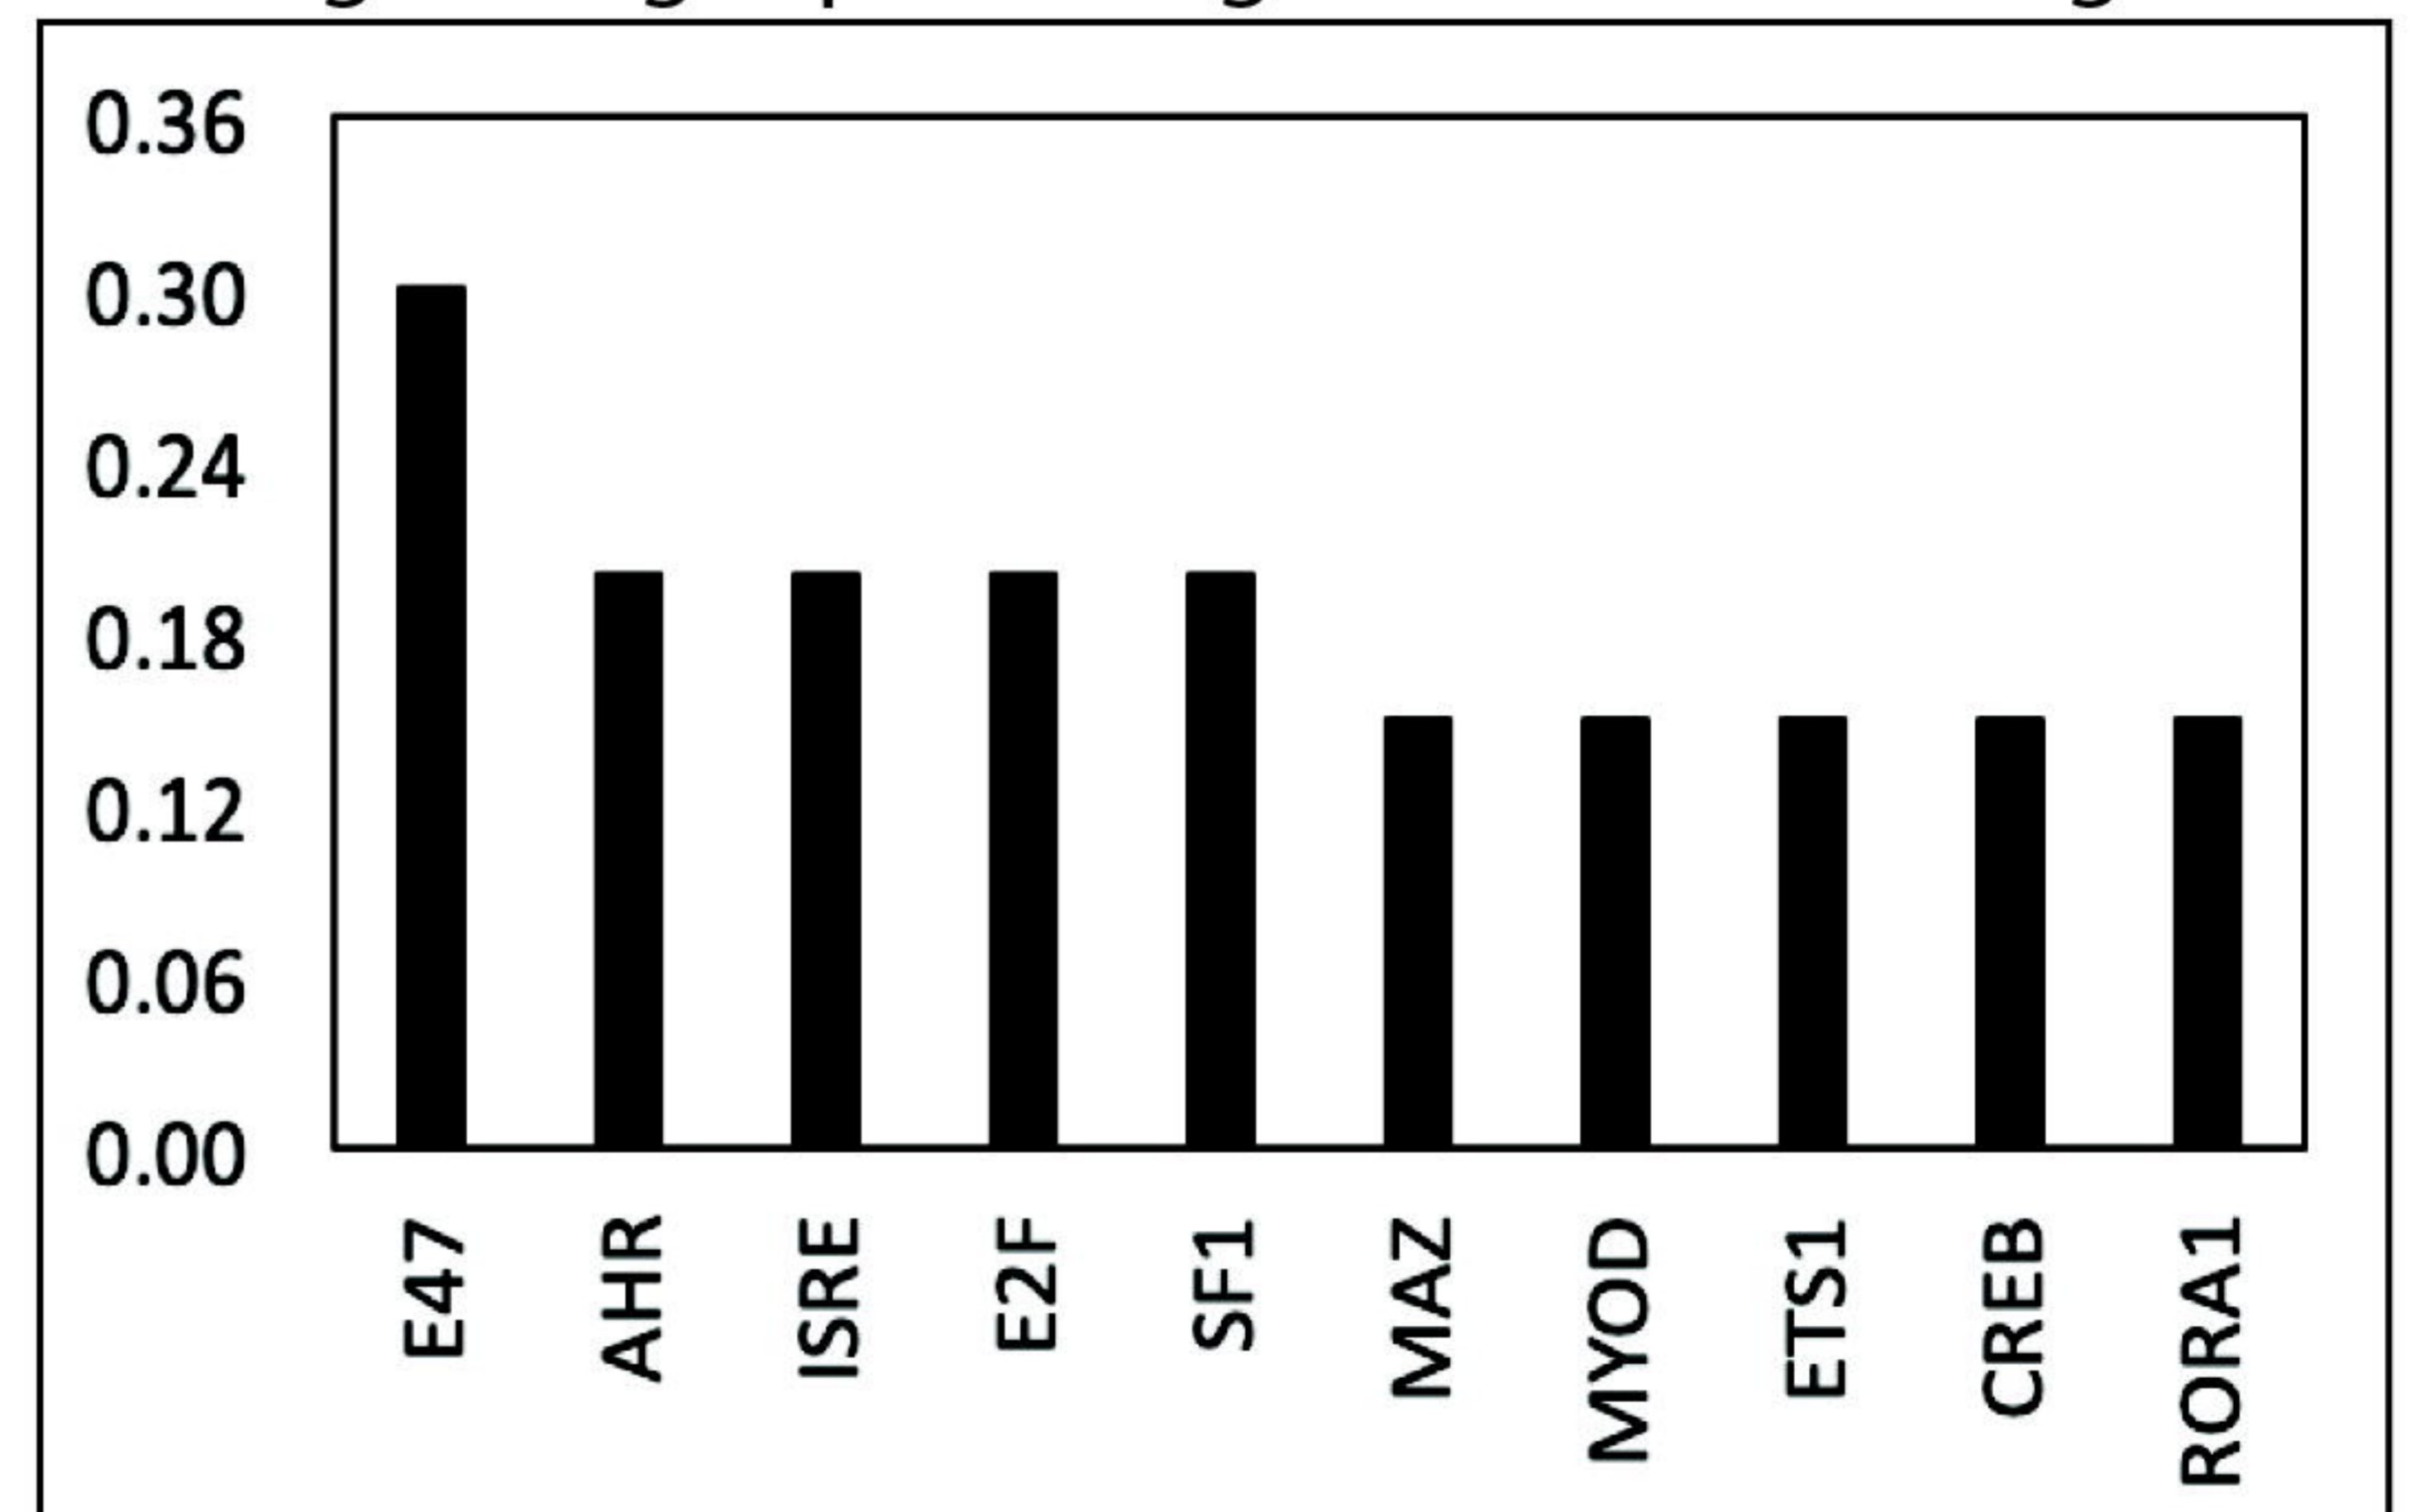

bioRxiv preprint doi: <https://doi.org/10.1101/002108>; this version posted August 24, 2021. The copyright holder for this preprint (which was not certified by peer review) is the author/funder, who has granted bioRxiv a license to display the preprint in perpetuity. It is made available under aCC-BY-NC-ND 4.0 International license.

### Oxidative Phosphorylation (hsa00190)

#### MECP2 mutant / MECP2 WT

| Cluster | NES   | Nom. p-value | FDR q-value |
|---------|-------|--------------|-------------|
| VIP     | -1.96 | 0.011        | 0.028       |
| SLC17A6 | -1.92 | < 0.001      | 0.029       |
| SST     | -1.87 | 0.015        | 0.017       |
| RELN    | -1.62 | 0.029        | 0.059       |
| PVALB   | -1.42 | 0.077        | 0.119       |
| SLC17A7 | 2.06  | < 0.001      | 0.008       |
